# Supplementary material
Source: publisher figshare collection journal article supplement (https://acs.figshare.com/ndownloader/files/23295332)
Supplement: Supplementary file 1 [file 23295332]

## Sheet: Table of Contents
Supporting Information: Assessing the mixture effects in in-vitro bioassays of chemicals occurring in small agricultural streams during rain events
Table S1: Sample ID, sampling date of water and suspended particulate matter (SPM) samples as well as wastewater impact on sites.
Table S2: DSSTox substance identifier (DTXSID), CAS number and molecular weight of chemicals analysed in the current study, along with their concentration in each water extract in ng/L.
Table S4: Bioassay applied in the current study.
Table S5: Available IC10 and EC values (M) for chemicals analyzed in the water extracts.
Table S6: IC10 and EC values for all water extracts in units of relative enrichment factor (REF).
Table S7: Benzo[a]pyrene equivalent concentrations (B[a]P-EQ) for, both, bioanalysis (BaP-BEQbio,iceberg) and chemical analysis (BaP-BEQchem) and toxic units for cytotoxicity (TUcytotoxicity) for both bioanalysis (TUcytotoxicity(bio, iceberg)) and chemical analysis (TUcytotoxicity(chem)) in the AhR CALUX assay.
Table S8: Rosiglitazone equivalent concentrations (Rosiglitazone-EQ) for, both, bioanalysis (Rosiglitazone-BEQbio,iceberg) and chemical analysis (Rosiglitazone-BEQchem) and toxic units for cytotoxicity (TUcytotoxicity) for both bioanalysis (TUcytotoxicity(bio, iceberg)) and chemical analysis (TUcytotoxicity(chem)) in the PPARγ GeneBLAzer assay.
Table S9: Dichlorvos equivalent concentrations (Dichlorvos-EQ) for, both, bioanalysis (Dichlorvos-BEQbio,iceberg) and chemical analysis (Dichlorvos-BEQchem) and toxic units for cytotoxicity (TUcytotoxicity) for both bioanalysis (TUcytotoxicity (bio, iceberg)) and chemical analysis (TUcytotoxicity(chem)) in the AREc32 assay.

## Sheet: Table S1
Table S1: Sample ID, sampling date of water and suspended particulate matter (SPM) samples as well as wastewater impact on sites.
										Marker for treated + untreated wastewater			Marker for untreated wastewater
State	Site ID	Sample ID	Sample Date (dd/mm/yyyy)	Urban area in catchement [%]	WWTP upstream	WWTP Type	resident equivalent	distance WWTP	Number of detected sewage indicators (n=14)	Concentration Acesulfame [ng/L] (Table S2)	Concentration Sucralose [ng/L] (Table S2)	Concentration Carbamazepine [ng/L] (Table S2)	Concentration Cyclamate [ng/L] (Table S2)	Concentration Saccharin [ng/L] (Table S2)	Concentration Caffeine [ng/L] (Table S2)	Comment
BB	1	a	2018-04-15	3.70997	No				3							Not impacted by wastewater
BW	2	a	2018-06-01	17.9457	No				13	176		5	354	680	591	Likely impacted by wastewater
		b	2018-06-10	17.9457	No				13	269			654	218	246	Likely impacted by wastewater
		c	2018-07-07	17.9457	No				13	116		7	533	179	410	Likely impacted by wastewater
BY	3	a	2018-05-24	18.1952	No				12	546	264	21	2058	771	1089	Likely impacted by wastewater
		b	2018-05-31	18.1952	No				12	673	313	21	2477	1763	1149	Likely impacted by wastewater
		c	2018-06-11	18.1952	No				12	787	299	23	2482	504	2067	Likely impacted by wastewater
		d	2018-07-03	18.1952	No				12	372		9	2697	426	582	Likely impacted by wastewater
	4	a	2018-05-15	4.113	No				8				43	439	228	Not impacted by wastewater
		b	2018-05-28	4.113	No				8				25	149	42	Not impacted by wastewater
	5	a	2018-05-15	8.56191	Yes	municipal	671	2.3	14	766	131		72	411	189	Impacted by WWTP effluent
		b	2018-05-28	8.56191	Yes	municipal	671	2.3	14	589	126	2	115	123	178	Impacted by WWTP effluent
		c	2018-06-06	8.56191	Yes	municipal	671	2.3	14	1081	245		211	103	329	Impacted by WWTP effluent
		d	2018-07-02	8.56191	Yes	municipal	671	2.3	14	981			47	63	193	Impacted by WWTP effluent
	6	a	2018-05-27	6.239	No				13			1	47	316	51	Likely impacted by wastewater
		b	2018-06-11	6.239	No				13				48	67	90	Likely impacted by wastewater
		c	2018-07-02	6.239	No				13				70	59	369	Likely impacted by wastewater
HE	7	a	2018-05-23	15.462	No				13	567	120	2	1479	187	786	Likely impacted by wastewater
	8	a	2018-05-13	0	No				10					789		Likely impacted by wastewater
		b	2018-05-22	0	No				10	68		7	126	112	353	Likely impacted by wastewater
		c	2018-05-29	0	No				10					133		Likely impacted by wastewater
NI	9	a	2018-04-15	4.75196	No				8						270	Not impacted by wastewater
		b	2018-05-31	4.75196	No				8	240			484	1444	1116	Not impacted by wastewater
	10	a	2018-05-15	0	No				10	242		2	25	13364	154	Likely impacted by wastewater
		b	2018-05-31	0	No				10	167		2	35	5521	197	Likely impacted by wastewater
		c	2018-06-10	0	No				10	61		2		240		Likely impacted by wastewater
	11	a	2018-04-15	7.1632	No				9				64			Not impacted by wastewater
		b	2018-05-10	7.1632	No				9				138	2135	204	Not impacted by wastewater
		c	2018-05-15	7.1632	No				9			1	80	419	176	Not impacted by wastewater
		d	2018-05-31	7.1632	No				9				162	730	307	Not impacted by wastewater
	12	a	2018-04-15	9.5295	No				9						586	Not impacted by wastewater
		b	2018-05-10	9.5295	No				9				118	2922	350	Not impacted by wastewater
		c	2018-05-15	9.5295	No				9					79	403	Not impacted by wastewater
		d	2018-05-31	9.5295	No				9	54			87	232	244	Not impacted by wastewater
	13	a	2018-05-29	2.07984	No				10	334	399		98	11984	634	Likely impacted by wastewater
	14	a	2018-05-10	2.0879	No				12	60		3	140	398	287	Likely impacted by wastewater
		b	2018-05-31	2.0879	No				12	90		9	64	326	231	Likely impacted by wastewater
	15	a	2018-04-15	8.34332	No				11						230	Likely impacted by wastewater
		b	2018-05-10	8.34332	No				11	87			200	3307	239	Likely impacted by wastewater
		c	2018-05-15	8.34332	No				11	104			161	69	111	Likely impacted by wastewater
		d	2018-05-31	8.34332	No				11	46			151	99	300	Likely impacted by wastewater
	16	a	2018-04-15	8.7527	No				5			4				Not impacted by wastewater
NW	17	a	2018-05-13	15.7505	No				13	189	278		254	884	857	Likely impacted by wastewater
		b	2018-05-27	15.7505	No				13	43			46	347	97	Likely impacted by wastewater
		c	2018-06-01	15.7505	No				13	995	615	108	222	1721	229	Likely impacted by wastewater
	18	a	2018-05-16	8.92581	No				10	28			188	510	781	Likely impacted by wastewater
		b	2018-05-22	8.92581	No				10	129			36	173	263	Likely impacted by wastewater
		c	2018-06-04	8.92581	No				10			1		66	197	Likely impacted by wastewater
RP	19	a	2018-06-11	1	No				4							Not impacted by wastewater
	20	a	2018-04-14	4	No				14	64		10	411	44	601	Likely impacted by wastewater
		b	2018-07-23	4	No				14	345		24	2057	443	341	Likely impacted by wastewater
		c	2018-09-07	4	No				14			14				Likely impacted by wastewater
	21	a	2018-04-14	6.1	Yes	industrial/paper	n.a.	10	14			4	319	38	418	Impacted by WWTP effluent
		b	2018-05-13	6.1	Yes	industrial/paper	n.a.	10	14	303	101	31	614	150	446	Impacted by WWTP effluent
		c	2018-06-01	6.1	Yes	industrial/paper	n.a.	10	14	677	87	55	1567	1804	1582	Impacted by WWTP effluent
		d	2018-06-08	6.1	Yes	industrial/paper	n.a.	10	14	320		51	1279	1183	602	Impacted by WWTP effluent
		e	2018-06-13	6.1	Yes	industrial/paper	n.a.	10	14	446		71	1468	463	941	Impacted by WWTP effluent
		f	2018-07-05	6.1	Yes	industrial/paper	n.a.	10	14	881	462	119	2944	753	3426	Impacted by WWTP effluent
	22	a	2018-04-14	6.9	Yes	industrial/quarry	n.a.	5.7	13			1	43		86	Impacted by WWTP effluent
		b	2018-05-13	6.9	Yes	industrial/quarry	n.a.	5.7	13	200		7	516	72	122	Impacted by WWTP effluent
		c	2018-05-14	6.9	Yes	industrial/quarry	n.a.	5.7	13	144		15	850		407	Impacted by WWTP effluent
		d	2018-07-17	6.9	Yes	industrial/quarry	n.a.	5.7	13			2	245	153	71	Impacted by WWTP effluent
		e	2018-08-20	6.9	Yes	industrial/quarry	n.a.	5.7	13	311	124	35			315	Impacted by WWTP effluent
	23	a	2018-04-14	7.4	Yes	industrial/old landfill	n.a.	1.5	14			5	221	36	242	Impacted by WWTP effluent
		b	2018-05-13	7.4	Yes	industrial/old landfill	n.a.	1.5	14	3319	1082	661	9322	1735	2596	Impacted by WWTP effluent
		c	2018-05-14	7.4	Yes	industrial/old landfill	n.a.	1.5	14	503		30	2035	518	783	Impacted by WWTP effluent
		d	2018-06-11	7.4	Yes	industrial/old landfill	n.a.	1.5	14	776	416	27	2316	1550	7702	Impacted by WWTP effluent
		e	2018-07-06	7.4	Yes	industrial/old landfill	n.a.	1.5	14	433	270	1	2618	585	580	Impacted by WWTP effluent
		f	2018-07-17	7.4	Yes	industrial/old landfill	n.a.	1.5	14			5	187	52	129	Impacted by WWTP effluent
	24	a	2018-04-14	11.7	No				14	1443	782	50	8704	1147	9788	Likely impacted by wastewater
		b	2018-05-13	11.7	No				14	1787	654	104	4419	983	1209	Likely impacted by wastewater
		c	2018-06-13	11.7	No				14	2083	1154	93	7078	1451	2969	Likely impacted by wastewater
		d	2018-07-23	11.7	No				14	954	1067	82	5814	789	4223	Likely impacted by wastewater
	25	a	2018-04-14	4.8	No				10			2	138	22	96	Likely impacted by wastewater
		b	2018-06-08	4.8	No				10			1	71	52	107	Likely impacted by wastewater
		c	2018-06-13	4.8	No				10			5	127		134	Likely impacted by wastewater
	26	a	2018-04-14	6.7	Yes	municipal	2974	1.8	14	3348	1654	16	2071	2262	1280	Impacted by WWTP effluent
		b	2018-05-14	6.7	Yes	municipal	2974	1.8	14	942	5797	181	157	342	119	Impacted by WWTP effluent
		c	2018-07-17	6.7	Yes	municipal	2974	1.8	14	287	751	15	525	138		Impacted by WWTP effluent
		d	2018-08-20	6.7	Yes	municipal	2974	1.8	14	434	455	7			640	Impacted by WWTP effluent
	27	a	2018-04-14	6.2	No				14	1357		1	8391	739	6146	Likely impacted by wastewater
		b	2018-05-14	6.2	No				14	1644	1118	2	8768	1043	2666	Likely impacted by wastewater
		c	2018-06-10	6.2	No				14							Likely impacted by wastewater
		d	2018-07-17	6.2	No				14							Likely impacted by wastewater
		e	2018-08-20	6.2	No				14	513	442	1			63	Likely impacted by wastewater
		f	2018-09-07	6.2	No				14	708	227	1	1887	436	1194	Likely impacted by wastewater
	28	a	2018-04-14	1.3	No				5				41			Not impacted by wastewater
SH	29	a	2018-05-10	3.62898	Yes	municipal	198	2.4	11	1181	206		380	3303	307	Impacted by WWTP effluent
SN	30	a	2018-06-10	0.312447	No				14	301		2	45	706	49657	Likely impacted by wastewater
	31	a	2018-04-15	6.7896	No				12	121		4	605	99	409	Likely impacted by wastewater
		b	2018-06-03	6.7896	No				12	2386	228	9	1916	1283	1278	Likely impacted by wastewater
		c	2018-06-10	6.7896	No				12	867.5	327.5	14	1058	725.5	946.5	Likely impacted by wastewater
		d	2018-06-26	6.7896	No				12	1043		23	1329.5	724.5	1486	Likely impacted by wastewater
	32	a	2018-05-16	6.84067	No				12				27	177	256	Likely impacted by wastewater
		b	2018-05-25	6.84067	No				12				43	59	162	Likely impacted by wastewater
		c	2018-05-31	6.84067	No				12		86		32	10		Likely impacted by wastewater
	33	a	2018-04-15	17.1208	No				14	505		3	473	100	272	Likely impacted by wastewater
		b	2018-05-20	17.1208	No				14	550		5	438	269	789	Likely impacted by wastewater
		c	2018-05-25	17.1208	No				14	614	267	4	734	547	264.5	Likely impacted by wastewater
	34	a	2018-06-08	0	No				2	702	379	4	126	111	54	Not impacted by wastewater
	35	a	2018-05-17	2.53202	Yes	municipal	473	1.4	12	255	290		528	336	191	Impacted by WWTP effluent
ST	36	a	2018-05-16	5.99666	No				13	544	322	59	126	59	80	Likely impacted by wastewater
		b	2018-05-17	5.99666	No				13	661.5	440	55.5	131.5	448	132	Likely impacted by wastewater
		c	2018-06-07	5.99666	No				13	54	196		223	86	277	Likely impacted by wastewater
		d	2018-06-12	5.99666	No				13	520	569	83	74	24	55	Likely impacted by wastewater
	37	a	2018-04-15	16.142	Yes	municipal	27526	5.2	14	191	295	41		155	2395	Impacted by WWTP effluent
		b	2018-05-16	16.142	Yes	municipal	27526	5.2	14	252	3146	368	125	1290	268	Impacted by WWTP effluent
		c	2018-06-07	16.142	Yes	municipal	27526	5.2	14	224	2831	435	35	78	190	Impacted by WWTP effluent
		d	2018-06-12	16.142	Yes	municipal	27526	5.2	14	142	2725	397	27		85	Impacted by WWTP effluent
	38	a	2018-05-11	10.4652	No				11	63		7		39		Likely impacted by wastewater
		b	2018-05-18	10.4652	No				11			6		1199	97	Likely impacted by wastewater
		c	2018-05-25	10.4652	No				11			5		18	101	Likely impacted by wastewater
		d	2018-06-03	10.4652	No				11	47		5	25	86	114	Likely impacted by wastewater
		e	2018-06-14	10.4652	No				11			10	22	54	45	Likely impacted by wastewater
	39	a	2018-05-24	0	No				1							Not impacted by wastewater
	40	a	2018-04-15	9.65632	No				11	49		3	53		25	Likely impacted by wastewater
		b	2018-05-11	9.65632	No				11	517		6	246	85	1327	Likely impacted by wastewater
	41	a	2018-04-15	14.2982	No				8				33		179	Not impacted by wastewater
		b	2018-05-16	14.2982	No				8			1	25	27	145	Not impacted by wastewater
TH	42	a	2018-05-24	2.41764	No				13	60	99	45	294	389	308	Likely impacted by wastewater
		b	2018-05-16	2.41764	No				13	238	101	73	558	350	476	Likely impacted by wastewater
	43	a	2018-05-11	10.1285	No				9			3	1484	588	636	Not impacted by wastewater
		b	2018-05-24	10.1285	No				9	68		3	306	112	59	Not impacted by wastewater
	44	a	2018-05-11	11.6001	No				11	168		7	418	1095	494	Likely impacted by wastewater
		b	2018-05-15	11.6001	No				11	42		7	201	256	506	Likely impacted by wastewater
		c	2018-05-24	11.6001	No				11					154		Likely impacted by wastewater
		d	2018-05-27	11.6001	No				11	127		6	195	223	2742	Likely impacted by wastewater
		e	2018-06-07	11.6001	No				11	113		6	326	239	608	Likely impacted by wastewater

## Sheet: Table S2
Table S2: DSSTox substance identifier (DTXSID), CAS number and molecular weight of chemicals analysed in the current study, along with their concentration in each water extract in ng/L.
Chemicals detected in at least one water extract							Site ID	1	2			3				4		5				6			7	8			9		10			11				12				13	14		15				16
Chemical Name	DTXSID	MW (g/mol)	CASRN	Method	ESI mode	Detection Frequency	Sample ID	a	a	b	c	a	b	c	d	a	b	a	b	c	d	a	b	c	a	a	b	c	a	b	a	b	c	a	b	c	d	a	b	c	d	a	a	b	a	b	c	d	a
(4-sulfophenyl)acetic acid	DTXSID30892516	216.21	153661-28-0	MZQ	neg	0.515625						1078.8				2938.8	1034.6	549.9	464.8	874.6					625.1	734.7	2052.1				578.4		315.9	914.7	4119.3	4937		1058.5	4641.7	1996					309.9	5492.1	3765.8
1 2 Benzisothiazolinone	DTXSID5032523	151.18	2634-33-5	TF	pos	0.078125																				764	56								45				22							17
1-(3-carboxypropyl)-3,7-dimethylxanthine	DTXSID40215232	266.257	6493-07-8	MZQ	pos	0.1875										4.1																										8.5					2.4
10,11-Dihydro-10,11-dihydroxycarbamazepine	DTXSID30891504	270.288	35079-97-1	MZQ	pos	0.632812		0.1	3				4.5	15.1	259.4	19.5	0.8	39.6	3.8	298.7	21.3	2.3	39	4	2.6				27.7	3.5	5		63.5				2.9	20.6				3.8	45.5		10.7
10,11-Dihydro-10-hydroxycarbamazepine	DTXSID50865484	254.289	29331-92-8	MZQ	pos	0.453125						0.3	1.2	0.1		5.2		158.2	33.8	1002.4	87.2		7.6		7.9	14.8						1.3				1.1	0.7				1.9
1H Benzotriazole	DTXSID6020147	119.127	95-14-7	TF	pos	0.914062			876	264	214	217	277	561	589	205	111	309	269	395	375	137	55	95	169		190	63	30	99	148	112	41	26	297	102	179	35	320	136	156	129	246	127	33	72	83	110
2 Benzothiazolesulfonic acid	DTXSID80240528	215.24	941-57-1	TF	neg	0.96875			3248	2086	1357	1063	1274	1754	2668	675	471	319	291	349	360	281	955	846	489	422	1309	349	148	1602	506	104	314	820	1979	1455	2779	571	1378	592	873	370		152	719	2153	1151	1847	122
2 Isopropyl 6 methyl pyrimidin 4 ol	DTXSID1027502	152.197	2814-20-2	TF	pos	0.265625														67						65					18		118		42								45			81
2(4-morpholinyl)benzothiazole	DTXSID90891505	220.29	4225-26-7	MZQ	pos	0.226562							7.6		5.1									0.4	5.1		7.9								4						8.3					4.8
2-(Methylthio)benzothiazole	DTXSID70274236	181.27	615-22-5	MZQ	pos	0.242188									48																9.4															49.4
2,3-Epoxypropyltrimethylammonium	DTXSID1044643	151.63	3033-77-0	MZQ	pos	0.0078125
2,4-Dichlorophenol	DTXSID1020439	163	120-83-2	MZQ	neg	0.140625										293.5		200.7		12.8					9.9		38.6								28.8	31.5			108.8	29.8						52.9	20
2,4-Dichlorophenoxyacetic acid	DTXSID0020442	221.03	94-75-7	MZQ	neg	0.046875																													32.5				93.5							63.6
2,4-Dinitrophenol	DTXSID0020523	184.107	51-28-5	MZQ	neg	0.609375			529.5			677.2	516.6			1340.1	602.3	622.9				357.2			578.4	559.9	2597.6	1530.1	1028.8	1351.3	639.2			1577.6	2784.1	1231.4	1530.6	1319.3	1370.8	855.8	857.6	723.5	693.5		659.3	2787.7	1074.1	1024.6	887.9
2,6-Dichlorobenzamide	DTXSID7022170	190.02	2008-58-4	MZQ	pos	0.210938			27.7			178.6	110.1	100.8	173.5		18.1		12.4												202.1	189.8	156.6											244.2
2-Acetonaphthone	DTXSID2041389	170.211	93-08-3	MZQ	pos	0.296875			395.9			161.3	205.3		344.3		188.5		132.2		194.7				146.6		340.8	119.4		421.2		253.6					397.5				332.7	206.4		190.9				264.9
2-Aminobenzimidazole	DTXSID1024465	133.154	934-32-7	MZQ	pos	0.09375								5									7.2	10
2-Hydroxyatrazine	DTXSID6037807	197.242	2163-68-0	MZQ	pos	0.539062						15.8	11.3	7	10.3	13.9	12.6	14.8	14.1	14	10.9	17.1	13.7	11.5	7.9	3.2	5.9	12.1			35.2	30	39.5			1		1.1					15.3	31.6	1.1
2-Hydroxybenzothiazole	DTXSID6061315	151.18	934-34-9	MZQ	neg	0.125														132.7													144.8												20.9	465.2
2-Hydroxycarbamazepine	DTXSID20218201	252.273	68011-66-5	MZQ	pos	0.53125						0.7	0.7	0.7	16.3	1.4	1.2		0.5	8.2					0.8		1	2.3		0.5	1.3	0.8	1.2		2.3		0.6						2.8	1.3
2-Methylbenzothiazole	DTXSID8049208	149.21	120-75-2	MZQ	pos	0.03125
2-Naphthalene sulfonic acid	DTXSID5044788	208.23	120-18-3	MZQ	neg	0.304688			0.5				0.4												10.1		63.3			0.4					0.9							0.6
2-Octyl-4-isothiazolin-3-one	DTXSID1025805	213.34	26530-20-1	MZQ	pos	0.148438						1.2	0.7														0.5													0.7							1.4
3,5,6-Trichloro-2-pyridinol	DTXSID7038317	198.43	6515-38-4	MZQ	neg	0.0859375																							22.2					60.3				125.2							60				90.9
4 Aminoantipyrine	DTXSID8048860	203.245	83-07-8	TF	pos	0.0390625
4 Methylbenzylidene camphor	DTXSID8047896	240.346	36861-47-9	TF	pos	0.0625			58																										18
4-(Dimethylamino)pyridine	DTXSID0044369	122.171	1122-58-3	MZQ	pos	0.140625																														11.8				10.8							13.9
4'-Aminoacetanilide	DTXSID7024455	150.181	122-80-5	MZQ	pos	0.695312			58.1			40.6	21.5		88.9	54.5	39.4	57	37.4		54.3	43.4		37.1	23.1	15.8	80.7	18.5		85.1	29.1	31.1			67.1	31.1	72.3		57.4	25	38.3	61.3	40.9	44.1		103	40.1	76.8
4-Aminobenzamide	DTXSID7038814	136.154	2835-68-9	MZQ	pos	0.5625			70.1				28.3		65.4	61.4	33	44.3	27.7						28.2	19.1	55.8			127.2	36.2	29.6			92.9	55.4	113.3		70.5	37.6	48.7	101				79.8	51.4	131.9
4-Amino-N,N-dimethylbenzenesulfonamide	DTXSID5061902	200.26	1709-59-7	MZQ	pos	0.015625
4-Formyl-antipyrine	DTXSID10241720	216.24	950-81-2	MZQ	pos	0.148438			3.2				3.3										6.5							6.5											4.3		6.4
4-Hydroxybenzotriazole	DTXSID90374722	135.126	26725-51-9	MZQ	pos	0.15625							11	36.6																				0.8				36.7											111.8
5-Methyl-1H-benzotriazole	DTXSID1038743	133.154	136-85-6	MZQ	pos	0.898438			567.3			51.6	66.5	140.8	279.2	184.3	105.9	117.4	71.9	87.5	73.6	74.4	27	60.8	117.3	97.8	330.6	41	6.3	35.5	88.5	45.5	21.3	16.2	170.5	78.7	89.3	27.1	162.5	69.4	82.6	73.6	116.6	29	12.6	111.2	58	71.2
6:2 Fluorotelomer sulfonic acid	DTXSID6067331	428.16	27619-97-2	MZQ	neg	0.382812			28.2			18.9	18.9	1.5	11		9.4		6.2	5.6	3.5	9.1	3.2	0.4				1.1	1	78.4					12.7		2.3	6.8	13.4		13.7	14.1	6.2	11.8	3.9	54.7		1.8
7-Amino-4-methylcoumarin	DTXSID40885333	175.187	26093-31-2	MZQ	pos	0.210938									4.9	5.2					2			1.4			37.7			4					3.4	4.3										8.2
7-Diethylamino-4-methylcoumarin	DTXSID9025035	231.295	91-44-1	MZQ	pos	0.21875			1.9						0.5	1.2											1.2																	0.7
7-Hydroxymethotrexate	DTXSID70891503	470.446	5939-37-7	MZQ	pos	0.0390625											5.4																				8.2					7.2
Acesulfame	DTXSID0048006	163.15	33665-90-6	TF	neg	0.664062			176	269	116	546	673	787	372			766	589	1081	981				567		68			240	242	167	61								54	334	60	90		87	104	46
Acetaminophen	DTXSID2020006	151.165	103-90-2	MZQ	pos	0.507812			62.8			104.5	303			69.2		39.9							672.5		53.5		51.2	67.8	19.3			68		50.8	163.5	71.2		35.4	64.4	82.8					39	86.6
Acetamiprid	DTXSID0034300	222.68	135410-20-7	MZQ	pos	0.28125			5.7																								3.3		2.4	1.9	13.2		4.6	2.1	5.7					2.6
Acetochlor	DTXSID8023848	269.77	34256-82-1	MZQ	pos	0.0078125
Acetyl-sulfamethoxazole	DTXSID8049044	295.31	21312-10-7	MZQ	pos	0.210938			8.7					4.4						47.6																								5.6		103.5	0.7
Acyclovir	DTXSID1022556	225.208	59277-89-3	MZQ	neg	0.015625
Albendazole	DTXSID0022563	265.33	54965-21-8	MZQ	pos	0.03125										9.8		6.6																								10.1
Allethrin	DTXSID8035180	302.414	584-79-2	MZQ	pos	0.546875			99.7			28.4	31.4		62.2	46.1	35.7	15.1	10.7		5.1	6.5		15.8	19.5	12.6	84.9	11.7		50.1	9.3	9.9				36.8	66.3			29.2	43.2	15.2		4.1			44	42.4
Amantadine	DTXSID8022117	151.253	768-94-5	MZQ	pos	0.210938																																							2.8
Ametryn	DTXSID1023869	227.33	834-12-8	MZQ	pos	0.03125
Amidosulfobetaine-14	DTXSID50398742	434.68	216667-08-2	MZQ	pos	0.554688			11.3			3.2	0.7	6.3	10.5	33.9	24.4	9.6	2.9				9.6	5.4	45.3	34.8	32.9			15.5	28.3	82.3			25.3	14.2	10.8		9.5	16.1	15.9	3.5	9.6			17.6	14.5	3.6
Amitriptyline	DTXSID7022594	277.411	50-48-6	MZQ	pos	0.09375						3.1	2.4
Anastrozole	DTXSID9022607	293.374	120511-73-1	MZQ	pos	0.898438		0.3	12.6			0.5	2.1	2.7	60.9	9.5	5.2	4.2	0.8	15.3		0.4	8.4		1.8	18.5	8.1	28.7	4.2	9.1	3.6	6.2	2.7	2.6	5.2	2.8	10.8	6.6	1.5	2.6	8.8	3	0.5	4.6	3.1	16.6	2.7	6.5	1.7
Atenolol	DTXSID2022628	266.341	29122-68-7	MZQ	pos	0.765625			16.6			2.8	5.5	7.9	3.1	4	2.3	4.6	2.6		2.3	2.3	4.4		1.7		280.4	6.9	2.6	10.8	4.8	5	2.9	2.5		5.4	7.8	3.8		4.8	5.5	7.3		5.3			6.2	21.1	2
Atorvastatin	DTXSID8029868	558.65	134523-00-5	MZQ	pos	0.078125																									6.1
Atrazine	DTXSID9020112	215.69	1912-24-9	MZQ	pos	0.320312						37.2	23.1	32.1	31.3	33	27.9	58.1	56.5	84.4	48.2	90.4	83.5	59.3	7.4		5.2	6.5																	2.1
Azelastine	DTXSID6022638	381.9	58581-89-8	MZQ	pos	0.1875			16.3				6.2																			4.5					7.2			2.5	12.5	6.6		3.9				5.1
Azoxystrobin	DTXSID0032520	403.394	131860-33-8	MZQ	pos	0.609375			6.5			15.6	7.9	61.1	9.4	7.2	13.4			1.5	1.3		1.3	4.3	42.6	7.7	2246.7	32.3		19.5			1.9		111.6	8.2	10.3		12.8	6.8	14.1	51.8				14.6	150.4	17.3
Benalaxyl	DTXSID3041619	325.408	71626-11-4	MZQ	pos	0.453125			0.1					1	0.5									0.3		1.6	0.1									1.5	0.1			1.4	0.1					2.1	1.4	0.1
Bendiocarb	DTXSID9032327	223.228	22781-23-3	MZQ	pos	0.375			18.6					6.3	73.8	10.7													9.3	5.3			2.9				9.1	11.7			10.9				2.9			5.1
Bentazone	DTXSID0023901	240.28	25057-89-0	TF	neg	0.742188		8				12	10	6	10	9	7	6	6	3		9	7	5	8		21339	2	2	6	186	167	103	5	13	30	20	1	3	3	1	4	7	9	8	10	7	5
Benzenesulfonic acid	DTXSID9024568	158.17	98-11-3	TF	neg	0.335938			413	103			51											90						113						53	281		90							135		435
Benzocain	DTXSID8021804	165.192	94-09-7	MZQ	pos	0.0078125																					66.9
Benzophenone-3	DTXSID3022405	228.247	131-57-7	MZQ	pos	0.25		2.7					0.6		6.6						5			5.7								0.5								2.1									1.1
Benzophenone-4	DTXSID2042436	308.3	4065-45-6	MZQ	neg	0.757812			38.5			66.2	117.3	112.2	69.2	24.9	16.2	220.4	85.9	154.5	143.5	12.5		12.7	35.1		13.2	2		8.3	10.9	10.3	9.7		13.1	3.4	20.5		28.1	6.4	8.3	3.2	17.9	12		23.5	3.1	27.4
Benzothiazole	DTXSID7024586	135.18	95-16-9	MZQ	pos	0.0078125
Benzyldimethylhexadecylammonium	DTXSID3047007	360.649	10328-34-4	MZQ	pos	0.0234375
Bezafibrate	DTXSID3029869	361.82	41859-67-0	MZQ	pos	0.171875												10.8	1.4		14.7				5.9
Bicalutamide	DTXSID2022678	430.37	90357-06-5	MZQ	neg	0.195312						17	14.9																				1.7
Bisoprolol	DTXSID6022682	325.449	66722-44-9	MZQ	pos	0.6875			1.9			10.2	15.7	17.8	7.7	14	6.8	4	3	5.1	4.8		0.7		4.2	1.2	5.2			0.2						0.8	0.6	0.1		0.7	0.6	0.6			0.5		0.9	0.3
Bisphenol S	DTXSID3022409	250.27	80-09-1	MZQ	neg	0.476562			29.4				7.1			12.3		12.9	2.3	40.9		4.2									17.5	3.2	4		13.4	3.7	1.1		13.3	5.9		8.6	11.8			7	7	4
Boscalid	DTXSID6034392	343.21	188425-85-6	MZQ	pos	0.664062			273.3			4.2	3.3		0.7		4.9								11.7	19.1	138.2	123.1		35.9	0.7	4.9			99.6	19.3	32.9		8.1	5.2	7.3	35.2		16.5		25.2	5.7
Bosentan	DTXSID7046627	551.62	147536-97-8	MZQ	pos	0.0078125
Bromoxynil	DTXSID3022162	276.915	1689-84-5	MZQ	neg	0.0859375							13.5														811.3			23.3							13.3				12.4	765.7		42.9
Bupirimate	DTXSID6041688	316.42	41483-43-6	MZQ	pos	0.0078125																				1.6
Bupropion	DTXSID7022706	239.74	34911-55-2	MZQ	pos	0.0078125
Caffeine	DTXSID0020232	194.194	58-08-2	TF	pos	0.875			591	246	410	1089	1149	2067	582	228	42	189	178	329	193	51	90	369	786		353		270	1116	154	197			204	176	307	586	350	403	244	634	287	231	230	239	111	300
Carbamazepine	DTXSID4022731	236.274	298-46-4	TF	pos	0.671875			5		7	21	21	23	9				2			1			2		7				2	2	2			1							3	9					4
Carbendazim	DTXSID4024729	191.19	10605-21-7	MZQ	pos	0.867188			31.7			7.2	17.9	21	29.9	17.2	5.7	7.3	7.1	6.8	7.1	1.7	25.4	92	11.4	1.6	17.9	2.6	3.9	264.7	1.7	0.8		6.3	39.3	30.5	41	9	30.1	20.7	37.1	24.7	7.7	2.8	5.3	21	14	15	3.1
Celecoxib	DTXSID0022777	381.37	169590-42-5	MZQ	pos	0.015625
Cetirizine	DTXSID4022787	388.89	83881-51-0	MZQ	pos	0.226562						6.1	7			3.9		3.1	4.6						4.1																							4.8
Chloridazon	DTXSID3034872	221.64	1698-60-8	MZQ	pos	0.421875						7.5	1.7	2.3	2.6	7.1	1.5	5	1.7	2.2	1.3	9.3	7.4	8.1	75.4	3.2	1.8	6.2	15.4	27.6				10	25.4	10.4	190.3		5.4	5.7	3.2				9.5	7.5	4.7	2.3
Chlormequat	DTXSID4048064	122.62	7003-89-6	MZQ	pos	0.226562							53.5			122.5	41.6	63.7							123		319.1			200.4					1041.9	253.2	171.5		253.4	120.1	80.2	569.1	87.5			1534
Chlorothalonil-4-hydroxy	DTXSID90182586	247.46	28343-61-5	MZQ	neg	0.78125			13.1			19.7	29.1	25.7	26.1	20.8	25.2	7.5	7.1	2.7	4.7		7.4	3.5	26.9	12.6	3766.7	35.2	36.1	446.2	6.1	4.8	5.9	4.1	27.8	19.8	41.4	3.3	7.9	10.4	26.4	75.6	4.3	3.7	7.6	31.3	50.1	33.8	2.3
Chlorotoluron	DTXSID8052853	212.68	15545-48-9	MZQ	pos	0.421875						4.8	7	8.1	2.2										4.5		319.6		3.2		3.6	3.7	2.2		1.7			6.6	1	1.2		6			3.2	0.9	1.2		3
Chloroxuron	DTXSID7040287	290.75	1982-47-4	MZQ	pos	0.0234375
Citalopram	DTXSID8022826	324.399	59729-33-8	MZQ	pos	0.234375						1.8	1.8																										6.7	2.2		2	1.2	1.9		9.6
Clarithromycin	DTXSID3022829	747.964	81103-11-9	MZQ	pos	0.03125
Clofibrate	DTXSID3020336	242.7	637-07-0	MZQ	pos	0.0546875																			23.2		245.2
Clofibric acid	DTXSID1040661	214.65	882-09-7	MZQ	neg	0.0078125
Clomazone	DTXSID1032355	239.7	81777-89-1	MZQ	pos	0.117188								4.7	2.2	8.3	6.5										162.1
Clonidine	DTXSID6022846	230.09	4205-90-7	MZQ	pos	0.132812																																1.8							1.8				1.3
Clopidogrel	DTXSID6022848	321.82	113665-84-2	MZQ	pos	0.164062							2.3
Clothianidin	DTXSID2034465	249.67	210880-92-5	TF	pos	0.335938			4			4	4				4		4	4		3			4	4	35	9	28	24				17	9	4	5	10	12	4				5	13	19	5
Clotrimazole	DTXSID7029871	344.84	23593-75-1	MZQ	pos	0.0234375
Cotinine	DTXSID1047576	176.219	486-56-6	MZQ	pos	0.929688			69.3			67.4	67.9	87.4	99.3	22.1	11.5	20.4	26.1	41	90.9	5.5	12.9	13.9	47.7	4.9	152.8	5	10.4	183.7	9.1	6.9	4.6	14.7	48.2	17.9	76.8	25	45.8	20.7	39.1	21.6	16.2	7.6	23.3	66.9	34.5	55	9.5
Crotamiton	DTXSID6040664	203.285	483-63-6	MZQ	pos	0.0078125
Cyclamate	DTXSID5041809	179.23	100-88-9	TF	neg	0.820312			354	654	533	2058	2477	2482	2697	43	25	72	115	211	47	47	48	70	1479		126			484	25	35		64	138	80	162		118		87	98	140	64		200	161	151
Cyclophosphamide	DTXSID5020364	261.08	50-18-0	MZQ	pos	0.0078125
Cyproconazole	DTXSID0032601	291.78	94361-06-5	MZQ	pos	0.28125																					105.4			54.7						1.2	5.3										1.1	3.8
Cyromazine	DTXSID6023999	166.188	66215-27-8	MZQ	pos	0.109375										8.9	2.8											3.7									4.9							2.7
Daidzein	DTXSID9022310	254.241	486-66-8	MZQ	neg	0.539062			23.8			24	42.6			79.8	53.7	34.6	41.3	4.7					25.1		43.2			19.1	6.2			3.2	17.6	6.1	10.4		4		4	34.2	6.8	4.6		21.6	10.4	14.6
Decylsulfate	DTXSID8042428	238.34	142-98-3	MZQ	neg	0.0703125
DEET	DTXSID2021995	191.274	134-62-3	MZQ	pos	0.578125			31.8				10.5		159.7	6.5		5.8	156		263				53.3			7.7		10.3			231.8		28.9	10.8	14.6	18		11.5	11.1	9.4		6.4		50.8	15.9	22.1
Denatonium	DTXSID9043770	325.475	47324-98-1	MZQ	pos	0.71875		1.8	0.6			2.8	6.4	17	207.5			12.1	2.1	199.6	13.9		21.5	5.7	3.1		10.9								1.4		0.1	7.8	2.3		0.7		0.5		11.2	42.9			3.8
Desethylatrazine	DTXSID5037494	187.63	6190-65-4	MZQ	pos	0.773438			3.7			69.3	41	57.1	74.1	69.1	63.5	119.9	135.1	260.9	216.8	169.6	86.6	129.2	6	2.2	6.3	3.1		4.3	2.7	3.5	0.8		7.9	2.5	3.9	1.6	6.3	2	3.1	4		6.9		9.3	2.2	3.9
Desethylterbutylazine	DTXSID80184211	201.66	30125-63-4	MZQ	pos	0.820312			100.9			242.9	290.2	199.2	1280.3	898.5	351.2	332	149.7	441.4	67.1	105.6	626.5	137.8	108.1	24.3	218.9	4548	30.7	269.5	18.1	62.9	209.8		65.7	30.4	200.5	4.6	28.8	27.7	302	516.8	2.8	408.5	2.1	72.5	29.4	121.3
Desisopropylatrazine	DTXSID0037495	173.6	1007-28-9	MZQ	pos	0.5			7.1			13	15	12	14.6		9.1		10.4	18.3	14	18.2	29.2	20.6			9.7	27.8	6	47.9				4.9	11		13.7		4.3		9.1	14.2		9.8		5.8		9.4
Desloratadine	DTXSID1044196	310.83	100643-71-8	MZQ	pos	0.0078125
Desphenyl chloridazon	DTXSID50212792	145.55	6339-19-1	MZQ	pos	0.703125			22.7			2667.6	1976.2	2429.9	2817.2	468.5	470.5	659.6	532.8	851.7	565.9	2929.7	1962.6	2156.5	1113.5	750.4	26.8	624.5	3329.3	3102.1	27.3	26.7	20.8	1416.4	1715.4	2301.6	1013.6	1119.6	2778.8	2687.3	1196	258.7		20.5	1755.2	1345.2	2284.9	2464.6	387.5
Diazepam	DTXSID4020406	284.74	439-14-5	MZQ	pos	0.078125
Diazinon	DTXSID9020407	304.34	333-41-5	TF	pos	0.0234375																																	5
Dichlorophen	DTXSID6021824	269.12	97-23-4	MZQ	neg	0.0546875			4.2																																							4.3
Dichlorprop	DTXSID0020440	235.06	120-36-5	MZQ	neg	0.09375						3.4				6.1									6.3		11840.8								11.1											15.5
Diclofenac	DTXSID6022923	296.15	15307-86-5	MZQ	pos	0.59375			147.2			54.5	88	103.4	41										32		29.4				15.9	5.3								29.5	81.3	22.2	12.1	18.5
Difenoconazole	DTXSID4032372	406.26	119446-68-3	MZQ	pos	0.273438			0.6			1		3																20.7					19.4											3
Diflufenican	DTXSID4041494	394.301	83164-33-4	MZQ	pos	0.382812						19.6			13.4	23.4	10	23.5				23.2			31.7	48.8	497.4				25.5				169.3	52.8			29.8	41.1			28.6			44.3	37.5
Dimethachlor	DTXSID3058111	255.74	50563-36-5	MZQ	pos	0.09375												2.8							7.4																	51.2
Dimethachlor ESA	DTXSID20891457	301.36	NOCAS_891457	MZQ	neg	0.3125						31.9	12.8	14.1	26.4			12.5	19.6	53.9	32.9				14	60.5		27.5														62.2
Dimethachlor OA		251.28	1086384-49-7	TF	pos	0.203125											14		12				23				13						13
Dimethenamid	DTXSID4032376	275.79	87674-68-8	MZQ	pos	0.570312			7.9			40.1	8.1	10.8	13.6	591.5	34.3	180.3	10.8	1.3	11.2	13.3	9.5	8.1	39.1	1.9	170.5	2637.1		78.1	18	23.1	17.1	10.4	12.6	3.8	3.5			3.4		45.1	5.5	282.1	5.9	22.7	9.4	37.9
Dimethoate	DTXSID7020479	229.25	60-51-5	MZQ	pos	0.3125							2.2		1.9			2							1.8		1.1			6.6							1.2				1.2
Dimethylaminophenazone	DTXSID7020504	231.299	58-15-1	MZQ	pos	0.0703125							7.7								5																8.6
Diphenylphosphate	DTXSID1048207	250.19	838-85-7	MZQ	pos	0.585938			552.5			0.2		22.9	75	1037	15.9	379.7		20.4	34.1	38.9	37.7	14.9	10.4		45.9	6.7		4.7	109.9		4.1		645.8	274.7	71		228.3	47.2		301	280.6			168.8	135.8	87.8
Diuron	DTXSID0020446	233.09	330-54-1	MZQ	pos	0.648438			53.6			6.1	7.8	7.5	10.8	6.6						4.9	36.7	127.8	3.7		2.8	2.4	1.1	2	3.8	7.4	2.2		36.2		3	3.3	6.6	3.2	16.1	2.2	8.6	14.2	1.2	50.4	14.5	5.7
Duloxetine	DTXSID6048385	297.42	116539-59-4	MZQ	pos	0.6875			51.7				3.2	6.5	151.5	65	18.8	33.4		34.9			22.4	2.6			12.1	141.7	13.2	37.9		8.9	5.9	1.8	31.8		57	18.3	22.6		49	9.5	16	5.5	7.4	131.7		40.7	3.2
Enalapril	DTXSID5022982	376.453	75847-73-3	MZQ	pos	0.0703125													1.2							28
Epoxiconazole	DTXSID1040372	329.76	133855-98-8	MZQ	pos	0.765625			4.4			16.9	15.2	46.9	16	19.8	32.5	9.7	11.2	3.2	17.2	20.2	15.6	12.2	17	10.9	1171.1	69.4		219.4	14	15.8	11.8		133.7	24.4	239		33.7	14.5	23.3	583.7	5.4	6.9		113.6	100.1	51
Ethofumesate	DTXSID8034580	286.34	26225-79-6	MZQ	pos	0.429688									11.7		371.8					5.9	47.3		110.2	333.8	2067.3	373.1		1118.3					19253.3	133.1	147.4		101.6	30	53.4	92.9				718.3	97.3	112.5
Fenofibrate	DTXSID2029874	360.83	49562-28-9	MZQ	pos	0.0234375							2.8
Fenoxycarb	DTXSID7032393	301.342	72490-01-8	MZQ	pos	0.046875			8.6					4.1													12.5
Fenpropidin	DTXSID9058157	273.464	67306-00-7	MZQ	pos	0.09375						5.8					6										12.6															14.4
Fenpropimorph	DTXSID4034601	303.49	67564-91-4	MZQ	pos	0.242188																			1.4		20.3	1.1		3.5	2.1				4.4				3.4			3.2				5	2.4
Fenthion	DTXSID8020620	278.32	55-38-9	MZQ	pos	0.0078125
Fenuron	DTXSID7037551	164.208	101-42-8	MZQ	pos	0.046875
Fipronil	DTXSID4034609	437.14	120068-37-3	MZQ	neg	0.109375							2.3
Fipronil desulfinyl	DTXSID0043719	389.08	205650-65-3	MZQ	neg	0.015625
Fipronil sulfide	DTXSID50869644	421.14	120067-83-6	MZQ	neg	0.0234375																			1.8
Fipronil Sulfone	DTXSID6074750	453.14	120068-36-2	MZQ	neg	0.09375						2.3								0.6																			1.8
Fluconazole	DTXSID3020627	306.277	86386-73-4	MZQ	pos	0.046875
Flufenacet	DTXSID2032552	363.33	142459-58-3	MZQ	pos	0.828125			3.7			67.7	20	23.8	142.7	45.1	34.4	19.1	8.8	0.2	0.2	3.9	16.9	7	23.6	3.2	587.4	4855	8.2	82.8	7.6	29.5	29.2	201.9	183	109.7	259.1	34.3	18.6	11	47	104.2	13.8	187.7	26.5	154.5	24.9	56.9	12.3
Fluoxastrobin	DTXSID2034625	458.83	361377-29-9	MZQ	pos	0.210938						4.8	1.7	3		24.3	11.1	7.1	1.9		1.2	2.4			10		58.7			25.1		2.1														85.8	5.4	70.8
Flurtamone	DTXSID5058228	333.31	96525-23-4	MZQ	pos	0.289062						5.9	2.6	3.4	3.9							8.3	4	3.4	2.5		18.3		0.9	7.2	2.2	2.6	1.4	0.8				1.7				7	6.4	2.7	9.8	10.4	4.2	4.5
Flusilazole	DTXSID3024235	315.399	85509-19-9	MZQ	pos	0.132812																							14.3	8.2					4.9	0.8				0.8		1.3				7.8	1.5
Fluvoxamine	DTXSID2044002	318.34	54739-18-3	MZQ	pos	0.695312			4			23.4	25.8	18.5	36.4	6.2		4.8	1.6	14	0.3		4.3		19.2		15.5			3.9		1.8	1.4		6.3		4.4					3.6		2.8
Furosemide	DTXSID6020648	330.74	54-31-9	MZQ	neg	0.34375						7	7												5.9				17.5					15.9				5.9							23.2				10.9
Gabapentin	DTXSID0020074	171.24	60142-96-3	MZQ	pos	0.0625
Gemfibrozil	DTXSID0020652	250.338	25812-30-0	MZQ	pos	0.0234375																														147.7											83.9
Genistein	DTXSID5022308	270.24	446-72-0	MZQ	neg	0.5			30.9			12.2	23.1	11.7		31.6	29.7	9.4	24.6		2.1		7.9	15.7	20	19.1	32.9			8.7	1.8	3.3	9.9		25	11.7	31.4		17.6	25.1	35.8	8.4		1.3		31.4	40.9	41.5
Glimepiride	DTXSID5040675	490.62	93479-97-1	MZQ	neg	0.0859375																												20.2
Guanylurea	DTXSID3043811	102.097	141-83-3	MZQ	pos	0.125													362.1																							126.6
Hexazinone	DTXSID4024145	252.318	51235-04-2	MZQ	pos	0.03125
Hydrochlorothiazide	DTXSID2020713	297.73	58-93-5	MZQ	neg	0.226562						116.7	129.4												61.7																	134.7
Icaridin	DTXSID0034227	229.32	119515-38-7	MZQ	pos	0.554688			39.2			30.8	16.6		311.3	10		9.3	8.4		46.6	17.7			36.5	8.4	33.4	6		44.2		9.6				18.2	22.6			9.6	19.3	11.9		19.7			14.8	47.7
Ifosfamide	DTXSID7020760	261.08	3778-73-2	MZQ	pos	0.0078125
Imazalil	DTXSID8024151	297.18	35554-44-0	MZQ	pos	0.0078125
Imidacloprid	DTXSID5032442	255.66	138261-41-3	TF	pos	0.234375						9					6												226	8					14		11
Imidacloprid-guanidine	DTXSID90436011	210.67	115970-17-7	MZQ	pos	0.0078125
Iminostilbene	DTXSID90871625	193.249	256-96-2	MZQ	pos	0.265625						56.7			114.9	41.4	18.7	19.9									450.6	4868.7		70.8		24.9			181		195				44.5	112.5		149.7		121.8		77.4
Indometacin	DTXSID9020740	357.79	53-86-1	MZQ	pos	0.0078125
Irgarol	DTXSID3032416	253.37	28159-98-0	MZQ	pos	0.21875			2.5											2.3			2.5			1.5	2.5						1.9
Isophorone diamine	DTXSID6027503	170.3	2855-13-2	MZQ	pos	0.0078125
Isoproturon	DTXSID1042077	206.289	34123-59-6	MZQ	pos	0.804688			21.9			9.2	20.6	32.5	17.2	1.8	2	1.4	3.5	3.3	1.2		5.3	6.7	4.3	1.4	6.2	1.9	1.8	13.5	7.5	6.1	2.8	2.8	13.5	1.5	3.6	2.2	30.3	1.6	20.5	5.5	11.5	5.2	3.6	4.6	1.3	1.9
Ketamine	DTXSID8023187	237.73	6740-88-1	MZQ	pos	0.0078125																																				13.2
Ketoprofen	DTXSID6020771	254.285	22071-15-4	TF	pos	0.304688			11				10			21	20	10					15								22				26		38		30	27	29							44
Lauramidopropylbetaine	DTXSID4041282	342.524	4292-10-8	MZQ	pos	0.0625																									4184					710.9
Lauric isopropanolamide	DTXSID00861815	257.418	142-54-1	MZQ	pos	0.0546875
Lauryl diethanolamide	DTXSID5025491	287.444	120-40-1	MZQ	pos	0.171875						31.5	27.3		60.8	134.7									26.4		136.2				199.2																5.5
Lenacil	DTXSID9042093	234.299	2164-08-1	MZQ	pos	0.414062			5								262.8								59.1	438.4	1306	215.3		179.4					13003.5	154.6	175.8		21.4	2.8	13.7	9.5				1002.5	49.3	34.3
Lidocaine	DTXSID1045166	234.343	137-58-6	MZQ	pos	0.125								5.9						90.6
Lincomycin	DTXSID3023215	406.54	154-21-2	MZQ	pos	0.0234375												10.9																									3.6	3.6
Loperamide	DTXSID6045165	477.05	53179-11-6	MZQ	pos	0.40625			12.9						5.1											3.8					4.4	5.9				2.5		2.9			6.9	20.5				1.7		15.1
Losartan	DTXSID7023227	422.92	114798-26-4	MZQ	pos	0.429688			4.7				4.8	4.6	4.7	3		2.7	6.5	5	7.5				7.1										1.1		5.4											4.1
MCPA	DTXSID4024195	200.62	94-74-6	MZQ	neg	0.804688			19.6			139.3		8.8	8.2	27.4				12.3	5.9			23.7	144.1	1556.4	7667.8	22.6	8.9	8769.8	888.7	23.1	31.1		769.4	513.5	4418.3		230	328.8	180.5	19.8		30.4	19.9	426.7	89.5	410.5
Mebendazole	DTXSID4040682	295.298	31431-39-7	MZQ	pos	0.125										10.8	3.4	5.6				2.5	2.2								2.5									2.8		4.7
Mebeverine	DTXSID6023238	429.557	3625-06-7	MZQ	pos	0.0390625							0.5				1.3														3.1
Mecoprop	DTXSID9024194	214.65	93-65-2	MZQ	neg	0.585938			1947.2			8.5	36.9	153.7	140.5	414	8.5	103.6			320.4			8	94.4		31.9	3.2	4.6	54.4					34.6	28.9	5.7	30.3	275.7	242.1	202.8	11.1		8.4		27.1	18.4	14	6.3
Mefenamic acid	DTXSID5023243	241.29	61-68-7	MZQ	pos	0.0234375
Melamine	DTXSID6020802	126.123	108-78-1	MZQ	pos	0.554688			1446.5				1476.9	1896.3	2932.5		1959		997.9	684	1443.3		786.3	1234.5	1033.8		2418.9	685.9		1240.4			369.2		1012.1		1372.7		740.2		913.1	772
Melperon	DTXSID0023298	263.356	3575-80-2	MZQ	pos	0.03125
Memantine	DTXSID5045174	179.307	19982-08-2	MZQ	pos	0.09375
Mepiquat	DTXSID9042122	114.211	15302-91-7	MZQ	pos	0.59375			50.1			8.4	30.6			18.8	6.7	17.3	2.1						8.7		257.8	6.9		32.5		5.9			69.3	14.1	38.7	4	38	15.2	16.2	76.4			3.6	118	18.9	27.8
Metalaxyl	DTXSID6024175	279.336	57837-19-1	MZQ	pos	0.953125			21.1			5.5	9.7	15.9	20.5	6.4	4.9	3.5	2.6	1.6	4.7	2.3	11.3	6.3	3.9	3.4	7.7	2.6	1.3	6.9	4.8	4.8	10.7	2	3	3.6	6.3	2.2	3.4	3.5	4.6	4.3	1.8	7.4	1.7	5	4.2	5.5	1
Metamitron	DTXSID7047568	202.217	41394-05-2	MZQ	pos	0.726562			1.2			8.6	2.5	6.3		12.7	66.4	7.2	0.8			2.8	64.4	14.9	872	3698.4	5091.5	555.4	5.5	2390.7	4.8	1.2			64269.4	781.3	2238.6		96.3	31.1	48.1	41.4			2.7	14037.3	214.3	1036.1
Metazachlor	DTXSID4058156	277.75	67129-08-2	MZQ	pos	0.492188						7.6				3.3	2.2	5.7	4.8	9.3	6.3		0.8		10.6		95.5		23.1	26				12.2	4.7	4.8	6.3	5		2.2		46.7			5.3	7.5	3.8	4.6	19
Metazachlor ESA	DTXSID40891454	323.37	NOCAS_891454	TF	neg	0.71875		16				78	51	47	68	242	260	273	300	475	327	116	47	48	129	82	134	101	174	50	189	164	151	296	195	339	143	267	229	214	62	950	14	15	196	92	80	37	63
Metconazole	DTXSID4034497	319.83	125116-23-6	MZQ	pos	0.140625																			0.1		1.5	0.4		0.6					8.8		0.1					0.5
Metformin	DTXSID2023270	129.167	657-24-9	TF	pos	0.773438			299	510	479	2165	3036	3454	2834	57	29	219	413	434	196		5	8	1107		434				58	14			34							315	386	113				239	32
Methiocarb	DTXSID3032626	225.31	2032-65-7	MZQ	pos	0.125								4.8		20.8		5.2		1.8			17.1					10.6					8.5		10.6				8.1			48.4	9.9			9.6
Methylparaben	DTXSID4022529	152.149	99-76-3	MZQ	neg	0.015625										460.8		0.9
Metolachlor	DTXSID4022448	283.8	51218-45-2	MZQ	pos	0.804688			71.2			498.1	91.3	50.1	97.3	1320.4	232.2	525.6	130.2	37.8	132.6	105.3	603.5	124.7	48.4	14.5	41.8	2	7.4	379.4	93	36.3	29.4	1.6	4.5	28.6	18.6	2		14.4	11.1	10040.6	38.6	372.6	1.7		27.8	22.9	1
Metolachlor ESA	DTXSID1037567	329.41	171118-09-5	TF	neg	0.648438			21	6	9	592	379	351	596	1782	1810	2242	2151	3039	2189	1566	1367	1058	60			6	117	131	3811	3331	2664			12	13	9	11	12		378	925	1138	8		4
Metolachlor OA	DTXSID6037568	279.336	152019-73-3	MZQ	neg	0.398438		6.7	9			75.5	33.5	43.3	86.7	201.3	172.8	227.3	183.5	179.1	166.2	73.1	160.7	85.1	10.2				11.5	18.5	2744.4	2448.4	2205.7									129.9	676.9	767.9
Metoprolol	DTXSID2023309	267.369	51384-51-1	TF	pos	0.554688						25	31	47	38			19	13	31	15				9		40					19	8									10	16	15				8
Metoprolol acid	DTXSID70881080	267.325	56392-14-4	MZQ	pos	0.796875			20.4			105.2	102.2	108.5	117.9	5.9	2.6	92.9	112.8	153.1	127.4				70.1	16.2	101.7	12.5		11.1	27.4	80.4	35.1	7		6.6		11.1		2.5	9.1	12	94.5	45.1		8.8	4.7	21.3
Metribuzin	DTXSID6024204	214.29	21087-64-9	MZQ	pos	0.203125						19.6	2.5	7.3	798.7												1	12.8		6.4	77.6	10.2	7									2.2	6.3	13.9
Monensin	DTXSID4048561	670.881	17090-79-8	MZQ	pos	0.0078125
m-Xylene-4-sulfonic acid	DTXSID1047023	186.23	88-61-9	MZQ	neg	0.789062			44			41	71.2	177	100.3	18.7	11.6	24.9	23.4	60.5	103.2	1.2			24.4		20.9			36.1			9.6	2.3	41.1	27.2	38.1	5.8	35	24.8			16.2	13.9		32.3	22.5	23.5	2.4
Myclobutanil	DTXSID8024315	288.78	88671-89-0	MZQ	pos	0.390625			22						2.9	2.3					3.2			2			3.7								5.6	10.4	5.4									8.8
Mycophenolic acid	DTXSID4041070	320.341	24280-93-1	MZQ	pos	0.265625								18.4		14.4		3.6					11.4			15.3							16						12.3							24
N Acetyl mesalazine	DTXSID80199002	195.174	51-59-2	TF	neg	0.046875									754						757
N Butylbenzenesulfonamide	DTXSID7027540	213.3	3622-84-2	TF	pos	0.585938			154	76	137			130	194	153	48	52	23	66	24		45	41		45	72	18		40	100	72			183	54	165		96	31	79	125	101	50		54	84	152
N Ethyl o toluenesulfonamide	DTXSID5052416	199.27	1077-56-1	TF	pos	0.398438					48			85	328								32			57			963					761				1592							1278				893
N,N-Dimethyldodecylamine N-oxide	DTXSID1020514	229.408	1643-20-5	MZQ	pos	0.0390625																												75.7
N-Acetyl-4-aminoantipyrine	DTXSID40232106	245.282	83-15-8	MZQ	pos	0.789062			36.7			97.2	89.9	135	131.6	2.2		109.2	106.5	188.9	135.7	13.9	0.4		237.2		39.4			14.8	14.9	10.2	6.4		4.2				2.7	2.3	6.9	42.8	12.2	14.8
Naproxen	DTXSID4040686	230.263	22204-53-1	TF	pos	0.101562									65													34
N-Cyclohexyl-2-benzothiazole-amine	DTXSID50891506	232.35	28291-75-0	MZQ	pos	0.398438			4.5			3.8	6.3	3.3	1.6								2.3	2	1.7		7.8								3		5.9				3.2					4.2	2.3
N-Formyl-4-aminoantipyrine	DTXSID10168241	231.255	1672-58-8	MZQ	pos	0.601562			11.7			25.3	25.2		43.5			37.6	26.8		51.3	5.5			65.7		25.5			7.3	10.9	10.3										35.4	10.5	13.2
Nitrendipin	DTXSID0023373	360.366	39562-70-4	MZQ	pos	0.367188			5.6			6.9	4.9	2.4		2.3		1.2							3.8		7.1									2	9.4					5.1				4		7
Nitrofurantoin	DTXSID7020972	238.159	67-20-9	TF	neg	0.0078125
N-Methyl-2-pyrrolidone	DTXSID6020856	99.133	872-50-4	MZQ	pos	0.382812			402.9							852.9	405.6	787.4	477.2			289.4			249.7		6624.5	321.6		831.8	842.9	723.6			658.8	809.4	831.5			757.5	539.2	1615.4					917.6	1215.4
Norfloxacin	DTXSID7037680	319.336	70458-96-7	MZQ	pos	0.0859375			899.5				559.9															618.7		523.2		522.5					543.6					742.3
Oryzalin	DTXSID8024238	346.36	19044-88-3	MZQ	neg	0.03125											3.8
Oxadiazone	DTXSID3024239	345.22	19666-30-9	MZQ	pos	0.015625			6.9
Oxazepam	DTXSID1021087	286.72	604-75-1	MZQ	pos	0.03125
Oxybutynin	DTXSID0023406	357.494	5633-20-5	MZQ	pos	0.195312			3.2			2.6	4.3	2.4				4.6																					3.6			1.7
Oxypurinol	DTXSID4035209	152.113	2465-59-0	TF	pos	0.15625										9557		1503																	5793											14851
Pendimethalin	DTXSID7024245	281.312	40487-42-1	MZQ	pos	0.0234375																					76.5
Pentoxifylline	DTXSID7023437	278.312	6493-05-6	MZQ	pos	0.1875			2.8																																							1.4
Perfluorodecanoic acid	DTXSID3031860	514.086	335-76-2	MZQ	neg	0.0234375																																								3.9
Perfluoroheptanoic acid	DTXSID1037303	364.062	375-85-9	MZQ	neg	0.15625										6203.9
Perfluorohexanoic acid	DTXSID3031862	314.054	307-24-4	MZQ	neg	0.265625			9.7				2	3.6	10.6								2.7			4.8		7.1		3.7		2.9					5.6				6.2	3.1						2
Perfluorooctanesulfonic acid	DTXSID3031864	500.13	1763-23-1	TF	neg	0.320312			12	12	7															3				8					5	4	8	6	2	3	2					2
Perfluorooctanoic acid	DTXSID8031865	414.07	335-67-1	TF	neg	0.046875
Pethoxamid	DTXSID4057928	295.81	106700-29-2	MZQ	pos	0.382812						372.2	21	208.5	28	8.8	7	2.4	2.8						4.5		13132.9		8.2	394.1	2.5		5.6		6.4	6.5	3.3			3		4.8	5.4	24.6			3.2
Phenazone	DTXSID6021117	188.23	60-80-0	MZQ	pos	0.398438								1.3	0.3				1	1.1	0.3				2																	2.1
Phenylbenzimidazole sulfonic acid	DTXSID3038852	274.29	27503-81-7	TF	neg	0.59375			44	187		32	144	130			29	78	42	92	106	69			28	24	20			111	30					53	44			24	37	49		50				1568
Phthalamic acid	DTXSID0058980	165.148	88-97-1	MZQ	neg	0.0703125								237.6									1251.9
Picolinafen	DTXSID8044339	376.311	137641-05-5	MZQ	pos	0.0625			71																						3.8									2.9							8.6	16.8
Picoxystrobin	DTXSID9047542	367.324	117428-22-5	MZQ	pos	0.273438						3.3				3.3		1.1									8.3			30					2.5	1.7	4.2					3.2				7.4	4.2
Pindolol	DTXSID8023476	248.326	13523-86-9	MZQ	pos	0.09375										38.1				161.6													358.4
Piperonyl butoxide	DTXSID1021166	338.444	51-03-6	MZQ	pos	0.492188			5.2			1.6	5	4		3.7	1.9		1.5						2.5	1.7	4.8			3.6		19.3	1056.1		1.6		2.2		3.1	2.1	2.3	1	2.6	1		2.6		5.4
Pirimicarb	DTXSID1032569	238.291	23103-98-2	TF	pos	0.257812			17				14						7				10					13		16					19	10	15				14	28		13				16
Pirimiphos-methyl	DTXSID0024266	305.33	29232-93-7	MZQ	pos	0.0078125
Primidone	DTXSID7023510	218.256	125-33-7	MZQ	pos	0.0234375
Prochloraz	DTXSID4024270	376.66	67747-09-5	MZQ	pos	0.1875						3.2				9.3		2.3									1593.9			28.3												41.2				27.8	7.8
Propamocarb	DTXSID1040295	188.271	24579-73-5	MZQ	pos	0.21875			2.8			10	56.6	401.6	54.4								41.5	3.5	6.7		4.4						638.8				3.4
Propanil	DTXSID8022111	218.08	709-98-8	MZQ	neg	0.0546875			2.1				2																									1.1							4.9				0.9
Propiconazole	DTXSID8024280	342.22	60207-90-1	MZQ	pos	0.820312			18			7	6.3	18.4	8.6	3.2	3.3	3.3	1.4		4.9	2.5	3.1	2	10.4	1.5	440.1	4.4	6.9	158.9	1.5			13.9	41.5	7.7	18.9	9.3	14.6	9.2	9.1	32.3		1.4	8.6	116.5	10.6	4.4	4.4
Propranolol	DTXSID6023525	259.349	525-66-6	MZQ	pos	0.273438																			3.5														2.2							2.6
Propylparaben	DTXSID4022527	180.203	94-13-3	MZQ	neg	0.132812								1397.9	852.1	242.2							16498.8	6851.7
Propyphenazone	DTXSID6023529	230.311	479-92-5	MZQ	pos	0.0546875																					2.2										1.2
Propyzamide	DTXSID2020420	256.13	23950-58-5	MZQ	pos	0.0859375																													3				5.7	7			3.3			34.8	7.9
Prosulfocarb	DTXSID3058119	251.39	52888-80-9	MZQ	pos	0.515625						30.6	10.6	4.8	1.1	2.3							2.9	0.2	4.7		51.2		2.3	53.6	150.6	31.6	12	1.4	3.1	6.9	7.2	3.2		4.3	7.5	14	159.9	22.3	16.3	7.6	8.3	7.1	1.5
Prothioconazole-desthio	DTXSID3044338	312.19	120983-64-4	MZQ	pos	0.78125			11.5			70.1	35.3	23.6	10.1	37.8	114.5	13.1	22.4	7.8	5.2	27.4	22.3	10.9	82	29.8	673.4	52.3		136.8	9.1	20.8	17		343.3	77.2	123.7		70.6	42.7	46.3	91.9	4.9	14.8		479.6	59.7	121.3
p-Toluenesulfonamide	DTXSID8029105	171.21	70-55-3	TF	pos	0.5			166			31	59			28	38			3080	160				20		25	49		64	149	62	127	162			150	117	16		67	76		119	136	19		103	69
Pyraclostrobin	DTXSID7032638	387.82	175013-18-0	MZQ	pos	0.140625															0.5																									2.6
Quinmerac	DTXSID1042364	221.64	90717-03-6	MZQ	pos	0.484375						1.7				2.5	1.7	2.1				7	27.7	5.7	38	3.1	1105.8	4.4		164.4	2.9	1.4	1.1		16	7.2	26.3		9.4	4.6	1.5	14.6				80.4	7.4	19.5
Quinoxyfen	DTXSID2034881	308.13	124495-18-7	MZQ	pos	0.0859375																													8.5
Ranitidine	DTXSID8045191	314.4	66357-35-5	MZQ	pos	0.0234375							27.9
Roxithromycin	DTXSID8041117	837.058	80214-83-1	MZQ	pos	0.03125
Saccharin	DTXSID5021251	183.18	81-07-2	TF	neg	0.835938			680	218	179	771	1763	504	426	439	149	411	123	103	63	316	67	59	187	789	112	133		1444	13364	5521	240		2135	419	730		2922	79	232	11984	398	326		3307	69	99
Scopolamine-N-butyl	DTXSID1022718	440.378	149-64-4	MZQ	pos	0.046875																																					0.3
Sertraline	DTXSID6023577	306.23	79617-96-2	MZQ	pos	0.304688			16.5			12.8		2.4	5.8									4.6	11					16.1						7.9	6.9				8.6						7.9	3.1
Simazine	DTXSID4021268	201.66	122-34-9	MZQ	pos	0.367188						0.1		4.1		10.9		6.5					18.6		1		25.8	126		59.2												16.8		2.4
Simetryn	DTXSID8037596	213.3	1014-70-6	MZQ	pos	0.03125									28.8
Sotalol	DTXSID0023589	272.36	3930-20-9	MZQ	pos	0.234375			4.3
Spiroxamine	DTXSID1034212	297.483	118134-30-8	MZQ	pos	0.28125						4.1				4.2							6.1		7.5		775.9								156.2	10.2	21.1									107.5	6.5
Sucralose	DTXSID1040245	397.63	56038-13-2	TF	neg	0.351562						264	313	299				131	126	245					120																	399
Sulcotrione	DTXSID9058230	328.76	99105-77-8	MZQ	neg	0.015625
Sulfadimethoxine	DTXSID1023607	310.33	122-11-2	MZQ	pos	0.109375																								5.8							3.4											3
Sulfamethazine	DTXSID6021290	278.33	57-68-1	MZQ	pos	0.0234375																						32.2		44.4												699.6
Sulfamethoxazole	DTXSID8026064	253.28	723-46-6	MZQ	pos	0.265625			12.1									1.7	2.9																								19	2.7		21.9	8.3
Sulfapyridine	DTXSID3026067	249.29	144-83-2	MZQ	pos	0.09375																			4.7
Tebuconazole	DTXSID9032113	307.82	107534-96-3	MZQ	pos	0.953125			11.6			23.4	6.2	26.8	8.1	28.4	116.9	8.3	3.8	1.9	22.3	2	4.3	2.6	29.5	17.9	816.4	50.3	675.1	494.3	2.8	3.1	4	3157	136.1	24.7	48.3	113.6	20.2	15.3	9.4	399.7		2.6	38.4	83.8	15.8	11.7	27.5
Temazepam	DTXSID8021309	300.74	846-50-4	MZQ	pos	0.09375			3.3							2.2														3.1
Terbuthylazine	DTXSID4027608	229.71	5915-41-3	MZQ	pos	0.875			23.8			692.8	306.3	200.8	176.2	946.6	237.7	513.5	154.9	54.7	44.4	158.2	562.6	412.1	71.1	6.5	6236.1	8761.7	38.8	226	23.9	97.1	133.2	1.5	23.7	18.5	37.7	4.2	13.2	30.5	71.8	12702.1	7.5	1312.8	1.5	32.2	37.5	39.9	1.5
Terbuthylazine-2-hydroxy	DTXSID20216888	211.269	66753-07-9	MZQ	pos	0.609375			75.2					57.6	81.1	75.3	17.4	29.4		30.7	27.4	17.7	86.9	74.7			68.9	204.6	28.3	30.1			45.3	28.8	271.1		99.9	11.3	62.7		50	128	13.2	91.3	7	56.1		17	3.9
Terbutryn	DTXSID3024318	241.36	886-50-0	MZQ	pos	0.789062		0.2	49			6.3	10.4	12.7	5.4	3.5	6.2	2.3	3.6	2.1	2.3	2.6	2.8	3	9.1		12.2			10.7	1.7				30.1	3.9	4.9	3.1	16.9	14.7	27.1				2.6	12.5	5.2	8.1	2.5
Tetracain	DTXSID1043883	264.369	94-24-6	MZQ	pos	0.0234375
Tetraglyme	DTXSID7044396	222.281	143-24-8	TF	pos	0.398438				3	9	2		6	6					4	4	9			3		16			3				7		3
Theophyllin	DTXSID5021336	180.167	58-55-9	TF	pos	0.828125			5238	906	555		907	1445	1176	195	115	110	242	254	327	155	1025	4250		30		32	34	317	172	89		37	214	82	230	96	199	99	111	362	141	50	33		95	72
Thiacloprid	DTXSID7034961	252.72	111988-49-9	TF	pos	0.640625			6	6	17	4	3	9	9	3	3		4	3					27	7	513	5		19	3		11		13	5	8		5	3		21				20	5	3
Thiacloprid amide	DTXSID60583566	270.74	676228-91-4	MZQ	pos	0.351562			6.2						9.1				0.4	3.2	3.6		3.9		2.9	6.7	445.7	28.3		5.5			2.2				4.6					15.9
Thiamethoxam	DTXSID2034962	291.71	153719-23-4	MZQ	pos	0.140625											5.7								1.2	57.9		18.2		20.1					346.9	6.1			4.8					4.8		9.5	9.1	6.5
TMDD	DTXSID7027041	226.36	126-86-3	TF	pos	0.664062				568	398	369		432	1408	712		240	333		1471	196	783	1371	702	821	258		1905		723		127	1776	3232	1178		2729	352	674	146		208		2539	261	974		2080
Tramadol	DTXSID90858931	263.381	27203-92-5	MZQ	pos	0.765625			7.2			2	5.1	17.1	1.8	2.1		3.9	1.7	1.8	6.7	0.9			8.6		13			1.9	6.6	3.2	44.9		6	4.4	64.1		13.4	6.3	16.9	61.5	7	2.6		17.1	2.7	2.5
Tri(butoxyethyl)phosphate	DTXSID5021758	398.477	78-51-3	MZQ	pos	0.570312			135.8			49.7	72.9	85	7.4	79.8	6420.8	97.9	48.8	76.6		436.7	49.3		311.8	1575.6	6523	1673.5		1406.5		20.5			25128.3	694.2	292.3				57.6	151.9				2766	269.9	128.6
Triadimenol	DTXSID0032493	295.77	55219-65-3	MZQ	pos	0.265625										5.7									7.7	4.4	94.2	28.5		43.3					9.5	4.9	6		5.3	6.1
Triclosan	DTXSID5032498	289.54	3380-34-5	MZQ	neg	0.046875
Tricresylphosphate	DTXSID4021391	368.363	1330-78-5	MZQ	pos	0.210938			522.1							40.4	23.6	20	12.3			68.8										20.8					11.2					9.9		44.7			20.8	73.1
Triethylcitrate	DTXSID0040701	276.285	77-93-0	MZQ	pos	0.289062								646		109.1		68		1481	198.3		1157.3							311.3						208.3	69.9					72.3					155.7
Triethylphosphate	DTXSID8026228	182.156	78-40-0	MZQ	pos	0.476562			8.3						1845.7	121.2	151.6	47.3	1						10.2		5.9				55.8				35.4	40.3		15.5	54.8	27.9	9.7	7.5	28.2			66.3	43
Trifloxystrobin	DTXSID4032580	408.377	141517-21-7	MZQ	pos	0.117188															0.2						1.8								7.3											2
Triglyme	DTXSID8026224	178.228	112-49-2	TF	pos	0.0703125							34									41					51										36
Tri-isobutylphosphate	DTXSID8040698	266.318	126-71-6	MZQ	pos	0.0546875		0.6																					2823.5									0.9
Trimethoprim	DTXSID3023712	290.323	738-70-5	MZQ	pos	0.195312								1.1																4.1												48.9				7	3.9
Triphenylphosphate	DTXSID1021952	326.288	115-86-6	MZQ	pos	0.0703125			0.8						11	4
Triphenylphosphine oxide	DTXSID2022121	278.291	791-28-6	MZQ	pos	0.484375			7580.5			266.1	391.1	2027.5	7813.7	4411.8	2210.7	8319.6	6782.1	7922.8	6436.4	955.1	1559	3354.3		289.7		1055.2		481.6	5499.8	4409.4	1179.3		1262.7	785.1	1558.7		773.8	1022.7	3267	8918.5	4622	910.8		420.9	1304.6	3611
Tris(2-chloroethyl)phosphate	DTXSID5021411	285.48	115-96-8	MZQ	pos	0.21875			98.3						303.8																						9.4									6.2		11.3
Valsartan	DTXSID6023735	435.528	137862-53-4	MZQ	pos	0.898438			63.9			269.2	383.4	353.4	79.2	8.2	7.7	223.2	147	204.5	228.1		7.7	1.4	254.5	58	154.4	48.5	8.3	21.8	13.2	95.1	19.2	7.7	17	10.4	16.8		10.2	9.7	10.1	63.9		8.5	7.4	21.2	9.5	22.3	7.1
Verapamil	DTXSID9041152	454.611	52-53-9	MZQ	pos	0.0546875
Ziprasidone	DTXSID4023753	412.94	146939-27-7	MZQ	pos	0.546875		77.9	206.2							839.8		360.2			62.8			107.1		2542.5		891.9		198.7	265.3	294.7		84	211.3		210.1	148.9	83.6		340.1	242	31.3	188.9		348		184.9	85.1
Chemicals not detected in any sample							Site ID	1	2			3				4		5				6			7	8			9		10			11				12				13	14		15				16
Chemical Name	DTXSID	MW (g/mol)	CASRN	Method	ESI mode	Detection Frequency	Sample ID	a	a	b	c	a	b	c	d	a	b	a	b	c	d	a	b	c	a	a	b	c	a	b	a	b	c	a	b	c	d	a	b	c	d	a	a	b	a	b	c	d	a
(3-Chloro-2-hydroxypropyl)trimethylammonium	DTXSID3027534	188.09	3327-22-8	MZQ	pos	0
2 Thiouracil	DTXSID4021347	128.15	141-90-2	TF	pos	0
2-(2-(Chlorophenyl)amino)benzaldehyde	DTXSID20698322	231.68	71758-44-6	MZQ	pos	0
2,6-Di-tert-butyl-1,4-benzoquinone	DTXSID7021493	220.312	719-22-2	MZQ	pos	0
2,6-Xylidine	DTXSID8026307	121.183	87-62-7	MZQ	pos	0
2,7-Naphthalenedisulfonic acid	DTXSID3059054	288.29	92-41-1	MZQ	neg	0
2-Isopropylthioxanthone	DTXSID1044691	254.35	5495-84-1	MZQ	pos	0
2-Morpholinothiobenzothiazole	DTXSID0021096	252.35	102-77-2	MZQ	pos	0
3,4,5-Trichlorophenol	DTXSID4026212	197.44	609-19-8	MZQ	neg	0
3,4-Dichlorophenylurea	DTXSID2041468	205.04	2327-02-8	MZQ	pos	0
3-Iodopropynyl butylcarbamate	DTXSID0028038	281.093	55406-53-6	MZQ	pos	0
4-Chlorophenol	DTXSID1021871	128.56	106-48-9	MZQ	neg	0
4-Fluorobenzoylpropionic acid	DTXSID30190084	196.177	366-77-8	MZQ	neg	0
4-Hydroxytamoxifen	DTXSID3037094	387.523	68392-35-8	MZQ	pos	0
4-Isopropylaniline	DTXSID20243932	135.21	99-88-7	MZQ	pos	0
5-Fluorouracil	DTXSID2020634	130.078	51-21-8	MZQ	neg	0
6 Mercaptopurine	DTXSID0020810	152.18	50-44-2	TF	pos	0
6-Propyl-2-thiouracil	DTXSID5021209	170.23	51-52-5	MZQ	neg	0
Abamectin	DTXSID8023892	873.077	71751-41-2	MZQ	pos	0
Ambroxol	DTXSID8022583	378.108	18683-91-5	MZQ	pos	0
Amiodarone	DTXSID7022592	645.32	1951-25-3	MZQ	pos	0
Azinphos methyl	DTXSID3020122	317.32	86-50-0	MZQ	pos	0
Azithromycin	DTXSID8030760	748.996	83905-01-5	MZQ	pos	0
Benzethonium	DTXSID5046984	412.637	10172-60-8	MZQ	pos	0
Benzyldimethyldodecylammonium	DTXSID60872947	304.541	10328-35-5	MZQ	pos	0
Bifenox free acid	DTXSID9073547	328.1	53774-07-5	MZQ	neg	0
Bifonazol	DTXSID9045631	310.4	60628-96-8	MZQ	pos	0
Bis(4-chlorophenyl)sulfone	DTXSID9024986	287.15	80-07-9	MZQ	pos	0
Bromochlorophen	DTXSID90165596	426.91	15435-29-7	MZQ	neg	0
Carbaryl	DTXSID9020247	201.225	63-25-2	MZQ	pos	0
Chlorfenvinphos	DTXSID7034250	359.56	470-90-6	MZQ	pos	0
Chlorophene	DTXSID5020154	218.68	120-32-1	MZQ	neg	0
Chlorpropham	DTXSID7020764	213.66	101-21-3	MZQ	pos	0
Ciprofloxacin	DTXSID8022824	331.347	85721-33-1	MZQ	pos	0
Clozapine	DTXSID5022855	326.83	5786-21-0	MZQ	pos	0
DCOIT	DTXSID5032315	282.22	64359-81-5	MZQ	pos	0
Dichlorvos	DTXSID5020449	220.97	62-73-7	MZQ	pos	0
Didecyldimethylammonium	DTXSID0048004	326.632	20256-56-8	MZQ	pos	0
Diflubenzuron	DTXSID1024049	310.68	35367-38-5	MZQ	pos	0
Diphenhydramine	DTXSID4022949	255.361	58-73-1	MZQ	pos	0
Dodecyl sulfate	DTXSID1026031	288.38	151-21-3	MZQ	neg	0
Dodecylbenzenesulfonic acid	DTXSID6027923	326.494	27176-87-0	MZQ	neg	0
Dodemorph	DTXSID5041019	281.484	1593-77-7	MZQ	pos	0
Domperidone	DTXSID1045116	425.92	57808-66-9	MZQ	pos	0
Ebastin	DTXSID6046472	469.669	90729-43-4	MZQ	pos	0
Efavirenz	DTXSID9046029	315.68	154598-52-4	MZQ	pos	0
Enrofloxacin	DTXSID1045619	359.401	93106-60-6	MZQ	pos	0
Erythromycin	DTXSID4022991	733.937	114-07-8	MZQ	pos	0
Ethion	DTXSID2024086	384.46	563-12-2	MZQ	pos	0
Ethyl 4-(dimethylamino)benzoate	DTXSID2044763	193.246	10287-53-3	MZQ	pos	0
Ethyl azinphos	DTXSID5037498	345.37	2642-71-9	MZQ	pos	0
Ethylenethiourea	DTXSID5020601	102.16	96-45-7	MZQ	pos	0
Etofenprox	DTXSID9032610	376.496	80844-07-1	MZQ	pos	0
Finasteride	DTXSID3020625	372.553	98319-26-7	MZQ	pos	0
Flufenoxuron	DTXSID1041978	488.77	101463-69-8	MZQ	pos	0
Flumequine	DTXSID5045623	261.252	42835-25-6	MZQ	pos	0
Flutamide	DTXSID7032004	276.215	13311-84-7	MZQ	neg	0
Glibenclamide	DTXSID0037237	494	10238-21-8	MZQ	pos	0
Hexadecylpyridinium	DTXSID8047979	304.541	7773-52-6	MZQ	pos	0
Hexadecyltrimethylammonium	DTXSID3047978	284.551	6899-10-1	MZQ	pos	0
Hydroxychloroquine	DTXSID8023135	335.88	118-42-3	TF	pos	0
Imidacloprid-urea	DTXSID1037563	211.65	120868-66-8	MZQ	pos	0
ISO E Super	DTXSID7031290	234.383	54464-57-2	MZQ	pos	0
Ketoconazole	DTXSID7029879	531.43	65277-42-1	MZQ	pos	0
Linuron	DTXSID2024163	249.09	330-55-2	MZQ	pos	0
Lorazepam	DTXSID7023225	321.16	846-49-1	MZQ	pos	0
L-Thyroxine	DTXSID8023214	776.874	51-48-9	MZQ	pos	0
Methimazol	DTXSID4020820	114.17	60-56-0	TF	pos	0
Methotrexate	DTXSID4020822	454.447	59-05-2	MZQ	pos	0
Methylchloroisothiazolinone	DTXSID9034286	149.59	26172-55-4	MZQ	pos	0
Miconazole	DTXSID6023319	416.12	22916-47-8	MZQ	pos	0
Mirtazapine	DTXSID0023325	265.36	61337-67-5	MZQ	pos	0
Montelukast	DTXSID9023334	586.19	158966-92-8	MZQ	pos	0
N-Cyclohexyl-2-benzothiazole-sulfenamide	DTXSID80167226	296.4	16170-33-5	MZQ	pos	0
Octyl-methoxycinnamate	DTXSID1025302	290.403	5466-77-3	MZQ	pos	0
Ofloxacin	DTXSID3041085	361.373	82419-36-1	MZQ	pos	0
Ondansetron	DTXSID8023393	293.37	99614-02-5	MZQ	pos	0
Orlistat	DTXSID8023395	495.745	96829-58-2	MZQ	pos	0
Paroxetine	DTXSID3023425	329.371	61869-08-7	MZQ	pos	0
Perfluorobutanoic acid	DTXSID4059916	214.039	375-22-4	MZQ	neg	0
Perfluorooctanesulfonamide	DTXSID3038939	499.14	754-91-6	MZQ	neg	0
Perfluorotetradecanoic acid	DTXSID3059921	714.117	376-06-7	MZQ	neg	0
Pioglitazone	DTXSID3037129	356.44	111025-46-8	MZQ	pos	0
Pravastatin	DTXSID6023498	424.534	81093-37-0	TF	neg	0
Promethazin	DTXSID7023518	284.42	60-87-7	MZQ	pos	0
Propachlor	DTXSID4024274	211.69	1918-16-7	MZQ	pos	0
Propoxycarbazone	DTXSID8037704	398.39	145026-81-9	MZQ	pos	0
Pyrazophos	DTXSID7042352	373.36	13457-18-6	MZQ	pos	0
Raloxifene	DTXSID3023550	473.59	84449-90-1	MZQ	neg	0
Risperidone	DTXSID8045193	410.493	106266-06-2	MZQ	pos	0
Ropinirole	DTXSID8045195	260.381	91374-21-9	MZQ	pos	0
Sulfathiazole	DTXSID8026068	255.31	72-14-0	MZQ	pos	0
Tacrolimus	DTXSID5046354	804.031	104987-11-3	MZQ	pos	0
Tamoxifen	DTXSID1034187	371.524	10540-29-1	MZQ	pos	0
TDCPP	DTXSID9026261	430.89	13674-87-8	MZQ	pos	0
Terbinafine	DTXSID2023640	291.438	91161-71-6	MZQ	pos	0
Tetrabromobisphenol A	DTXSID1026081	543.875	79-94-7	MZQ	neg	0
Tetrachlorosalicylanilide	DTXSID4040767	351	1154-59-2	TF	neg	0
Tetradecylsulfate	DTXSID8041292	294.45	4754-44-3	MZQ	neg	0
Thiabendazole	DTXSID0021337	201.25	148-79-8	MZQ	pos	0
Triallate	DTXSID5024344	304.65	2303-17-5	MZQ	pos	0
Triclocarban	DTXSID4026214	315.58	101-20-2	MZQ	pos	0
Trimethyloctylammonium	DTXSID10165674	172.335	15461-38-8	MZQ	pos	0
Tris(1-chloro-2-propyl)phosphate	DTXSID5026259	327.56	13674-84-5	MZQ	pos	0
Vardenafil	DTXSID3048318	488.61	224785-90-4	MZQ	pos	0
[truncated: 86 more columns]

## Sheet: Table S4
Table S4: Bioassay applied in the current study
Endpoint	Assay	Cell line	Abbreviation	Method Reference	Positive reference compound	EC value	Reference compound EC value (M)
Activation of the arylhydrocarbon receptor (AhR)	AhR CALUX (H4L7.5c2)	H4IIe	AhR CALUX	Brennan JC, He GC, Tsutsumi T, Zhao J, Wirth E, Fulton MH, Denison MS. 2015. Development of species-specific Ah receptor-responsive third generation CALUX cell lines with enhanced responsiveness and improved detection limits. Environmental Science & Technology 49:11903-11912. DOI: 10.1021/acs.est.5b02906.	2,3,7,8-Tetrachlorodibenzo-p-dioxin (TCDD)	EC10	(5.17 ± 0.08) × 10-13
Binding to peroxisome proliferator-activated receptor γ (PPARγ)	PPARγ GeneBLAzer	HEK293H	PPAR-BLA	Neale PA, Altenburger R, Ait-Aissa S, Brion F, Busch W, Umbuzeiro GD, Denison MS, Du Pasquier D, Hilscherova K, Hollert H, Morales DA, Novak J, Schlichting R, Seiler TB, Serra H, Shao Y, Tindall AJ, Tollefsen KE, Williams TD, Escher BI. 2017. Development of a bioanalytical test battery for water quality monitoring: Fingerprinting identified micropollutants and their Contribution to effects in sur…	Rosiglitazone	EC10	(4.64 ± 0.21) × 10-10
Activation of the estrogen receptor (ERα)	ERα GeneBLAzer	HEK293T	ER_BLA		17β-Estradiol	EC10	(1.19 ± 0.05) × 10-11
Oxidative stress response	AREc32	MCF7	AREc32	Wang XJ, Hayes JD, Wolf CR. 2006. Generation of a stable antioxidant response element-driven reporter gene cell line and its use to show redox-dependent activation of Nrf2 by cancer chemotherapeutic agents. Cancer Research 66:10983-10994. DOI: 10.1158/0008-5472.Can-06-2298.	tert-Butylhydroquinone (tBHQ)	ECIR1.5	(2.35 ± 0.03) × 10-6

## Sheet: Table S5
Table S5: Available IC10 and EC values (M) for chemicals analyzed in the water extracts.
5		Activation of AhR					Binding to PPARγ					Oxidative Stress Response
Chemical Name	DTXSID	IC10 (M)	SE	EC10 (M)	SE	Source	IC10 (M)	SE	EC10 (M)	SE	Source	IC10 (M)	SE	EC1R1.5 (M)	SE	Source
(3-Chloro-2-hydroxypropyl)trimethylammonium	DTXSID3027534	not active		not active		Tox21	not active		not active		Tox21	not active		not active		Tox21
(4-sulfophenyl)acetic acid	DTXSID30892516
1 2 Benzisothiazolinone	DTXSID5032523	7.51718e-05		not active		Tox21	3.49309e-05		not active		Tox21	2.02443e-05		not active		Tox21
1-(3-carboxypropyl)-3,7-dimethylxanthine	DTXSID40215232
10,11-Dihydro-10,11-dihydroxycarbamazepine	DTXSID30891504
10,11-Dihydro-10-hydroxycarbamazepine	DTXSID50865484
1H Benzotriazole	DTXSID6020147	0.00168407	0.000396485	0.00060746	2.03102e-05	Current study	not active		not active		Tox21	0.00368053	0.000523023	not active		Current study
2 Benzothiazolesulfonic acid	DTXSID80240528	0.000511143	4.93795e-05	0.000147767	4.26441e-06	Current study	0.000949668	7.1924e-05	8.91258e-05	3.35291e-06	Current study	not active		8.62664e-05	4.28951e-06	Current study
2 Isopropyl 6 methyl pyrimidin 4 ol	DTXSID1027502	not active		not active		Tox21	not active		not active		Tox21	not active		not active		Tox21
2 Thiouracil	DTXSID4021347	not active		not active		Tox21	not active		not active		Tox21	not active		not active		Tox21
2-(2-(Chlorophenyl)amino)benzaldehyde	DTXSID20698322
2(4-morpholinyl)benzothiazole	DTXSID90891505
2-(Methylthio)benzothiazole	DTXSID70274236	not active		0.000332116	1.63135e-05	Current study	not active		not active		Current study	0.000365657	5.15301e-05	0.000239808	2.82364e-05	Current study
2,3-Epoxypropyltrimethylammonium	DTXSID1044643	not active		not active		Tox21	not active		not active		Tox21	not active		not active		Tox21
2,4-Dichlorophenol	DTXSID1020439	not active		7.83192e-05		Tox21	not active		not active		Tox21	not active		not active		Tox21
2,4-Dichlorophenoxyacetic acid	DTXSID0020442	not active		not active		Tox21	not active		7.38859e-06	4.43695e-07	Current study	0.000316316	6.94e-05	not active		Current Study
2,4-Dinitrophenol	DTXSID0020523	1.80517e-05		not active		Tox21	not active		not active		Tox21	0.000455622	3.12426e-05	0.000249004	1.32562e-05	Current study
2,6-Dichlorobenzamide	DTXSID7022170	0.000437579	6.64038e-05	not active		Current study	not active		not active		Tox21	not active		not active		Tox21
2,6-Di-tert-butyl-1,4-benzoquinone	DTXSID7021493	not active		not active		Tox21	not active		not active		Tox21	not active		not active		Tox21
2,6-Xylidine	DTXSID8026307	not active		not active		Tox21	not active		not active		Tox21	not active		not active		Tox21
2,7-Naphthalenedisulfonic acid	DTXSID3059054
2-Acetonaphthone	DTXSID2041389	not active		not active		Tox21	not active		not active		Tox21	not active		not active		Tox21
2-Aminobenzimidazole	DTXSID1024465	8.486e-05		4.28608e-05		Tox21	not active		not active		Tox21	not active		not active		Tox21
2-Hydroxyatrazine	DTXSID6037807
2-Hydroxybenzothiazole	DTXSID6061315	0.000191227	9.01391e-06	0.000118294	1.17727e-05	Current study	0.000465679	1.90466e-05	2.58584e-05	1.98216e-06	Current study	0.00222965	0.000988803	0.000245942	7.57061e-06	Current study
2-Hydroxycarbamazepine	DTXSID20218201
2-Isopropylthioxanthone	DTXSID1044691	not active		3.72046e-06		Tox21	not active		not active		Tox21	not active		1.95829e-06		Tox21
2-Methylbenzothiazole	DTXSID8049208	not active		not active		Tox21	not active		not active		Tox21	not active		not active		Tox21
2-Morpholinothiobenzothiazole	DTXSID0021096	not active		1.24021e-05		Tox21	not active		not active		Tox21	not active		not active		Tox21
2-Naphthalene sulfonic acid	DTXSID5044788	not active		not active		Tox21	not active		not active		Tox21	6.73148e-05		not active		Tox21
2-Octyl-4-isothiazolin-3-one	DTXSID1025805	6.26644e-05		not active		Tox21	6.9663e-06		not active		Tox21	8.43359e-06		not active		Tox21
3,4,5-Trichlorophenol	DTXSID4026212	not active		not active		Tox21	5.08089e-06		not active		Tox21	2.3901e-05		not active		Tox21
3,4-Dichlorophenylurea	DTXSID2041468
3,5,6-Trichloro-2-pyridinol	DTXSID7038317	5.71e-05	4.38461e-06	not active		Current study	7.03166e-05	7.75631e-06	6.21714e-06	4.0456e-07	Current study	0.000120179	1.19213e-05	not active		Current study
3-Iodopropynyl butylcarbamate	DTXSID0028038	3.50515e-05		not active		Tox21	1.79163e-05		not active		Tox21	1.69028e-05		not active		Tox21
4 Aminoantipyrine	DTXSID8048860	not active		not active		Tox21	not active		not active		Tox21	not active		not active		Tox21
4 Methylbenzylidene camphor	DTXSID8047896	not active		not active		Tox21	3.78449e-05		not active		Tox21	not active		not active		Tox21
4-(Dimethylamino)pyridine	DTXSID0044369	not active		not active		Tox21	not active		not active		Tox21	not active		not active		Tox21
4'-Aminoacetanilide	DTXSID7024455	not active		not active		Tox21	not active		not active		Tox21	not active		not active		Tox21
4-Aminobenzamide	DTXSID7038814	not active		not active		Tox21	not active		not active		Tox21	not active		not active		Tox21
4-Amino-N,N-dimethylbenzenesulfonamide	DTXSID5061902
4-Chlorophenol	DTXSID1021871	not active		not active		Tox21	not active		not active		Tox21	not active		not active		Tox21
4-Fluorobenzoylpropionic acid	DTXSID30190084
4-Formyl-antipyrine	DTXSID10241720
4-Hydroxybenzotriazole	DTXSID90374722
4-Hydroxytamoxifen	DTXSID3037094	1.54691e-05		not active		Tox21	7.79473e-06		not active		Tox21	1.51296e-05		not active		Tox21
4-Isopropylaniline	DTXSID20243932
5-Fluorouracil	DTXSID2020634	4.78451e-05		not active		Tox21	not active		not active		Tox21	not active		5.18754e-05		Tox21
5-Methyl-1H-benzotriazole	DTXSID1038743	0.000558597	4.46203e-05	0.000256404	6.26135e-06	Current study						0.000459707	4.4168e-05	not active		Current study
6 Mercaptopurine	DTXSID0020810	4.11592e-05		2.54876e-05		Tox21	1.24673e-05		not active		Tox21	6.16468e-06		2.30198e-06		Tox21
6:2 Fluorotelomer sulfonic acid	DTXSID6067331
6-Propyl-2-thiouracil	DTXSID5021209	not active		not active		Tox21	not active		not active		Tox21	not active		not active		Tox21
7-Amino-4-methylcoumarin	DTXSID40885333	not active		0.000186508	4.40381e-06
7-Diethylamino-4-methylcoumarin	DTXSID9025035	0.000138525	5.31446e-05	1.50723e-06	5.82841e-08	Current study	not active		9.45274e-06	4.10167e-06	Current study	not active		9.82125e-05	6.6864e-06	Current study
7-Hydroxymethotrexate	DTXSID70891503
Abamectin	DTXSID8023892	not active		not active		Tox21	5.30394e-06		not active		Tox21	6.91427e-06		not active		Tox21
Acesulfame	DTXSID0048006	0.00233427	0.00026443	not active		Current study	not active		not active		Current study	0.0523834	0.0354802	not active		Current study
Acetaminophen	DTXSID2020006	not active		not active		Tox21	not active		not active		Tox21	0.0116		0.003628	0.000196	Escher et al. 2013
Acetamiprid	DTXSID0034300	0.000403763	7.08668e-05	not active		Current study	not active		not active		Tox21	0.000763184	0.000116082	not active		Current study
Acetochlor	DTXSID8023848	not active		not active		Tox21	not active		not active		Tox21	2.8995e-05		not active		Tox21
Acetyl-sulfamethoxazole	DTXSID8049044	not active		not active		Tox21	not active		not active		Tox21	not active		not active		Tox21
Acyclovir	DTXSID1022556	not active		not active		Tox21	not active		not active		Tox21	not active		not active		Tox21
Albendazole	DTXSID0022563	not active		6.45359e-06		Tox21	4.40369e-05		not active		Tox21	not active		not active		Tox21
Allethrin	DTXSID8035180	not active		not active		Tox21	6.02504e-05		not active		Tox21	4.73423e-05		not active		Tox21
Amantadine	DTXSID8022117	not active		not active		Tox21	not active		not active		Tox21	not active		not active		Tox21
Ambroxol	DTXSID8022583
Ametryn	DTXSID1023869	not active		not active		Tox21	not active		not active		Tox21	not active		not active		Tox21
Amidosulfobetaine-14	DTXSID50398742
Amiodarone	DTXSID7022592	2.01183e-05		not active		Tox21	5.16452e-06		not active		Tox21	5.08894e-06		not active		Tox21
Amitriptyline	DTXSID7022594
Anastrozole	DTXSID9022607	not active		not active		Tox21	not active		not active		Tox21	not active		not active		Tox21
Atenolol	DTXSID2022628	not active		not active		Tox21	not active		not active		Tox21	0.00406		0.000724	3.9e-05	Escher et al. 2013
Atorvastatin	DTXSID8029868	8.19315e-05		not active		Tox21	not active		not active		Tox21	0.000411		3.11e-05		Tox21
Atrazine	DTXSID9020112	not active		not active		Tox21	not active		not active		Tox21	7.6e-05		not active		Escher et al. 2013
Azelastine	DTXSID6022638
Azinphos methyl	DTXSID3020122	not active		not active		Tox21	6.08712e-05		not active		Tox21	4.7e-05		not active		Escher et al. 2013
Azithromycin	DTXSID8030760	2.54176e-05	3.87413e-06	not active		Current study	4.3635e-05		not active		Tox21	5.83867e-05	5.62519e-06	2.23544e-05	1.63907e-06	Current study
Azoxystrobin	DTXSID0032520	2.76645e-07	2.25246e-08	not active		Current study	3.14723e-05		not active		Tox21	0.000196816	2.97844e-05	not active		Current study
Benalaxyl	DTXSID3041619	not active		not active		Tox21	not active		not active		Tox21	0.000179656	3.84216e-05	not active		Current study
Bendiocarb	DTXSID9032327	not active		not active		Tox21	not active		not active		Tox21	not active		3.38962e-05		Tox21
Bentazone	DTXSID0023901	0.00118106	0.000151206	not active		Current study	not active		not active		Tox21	0.000757346	4.92413e-05	not active		Current study
Benzenesulfonic acid	DTXSID9024568	not active		not active		Tox21	not active		not active		Tox21	not active		not active		Tox21
Benzethonium	DTXSID5046984
Benzocain	DTXSID8021804	not active		6.7592e-05		Tox21	4.31648e-05		not active		Tox21	not active		5.37439e-05		Tox21
Benzophenone-3	DTXSID3022405	not active		4.21243e-05		Tox21	not active		not active		Tox21	not active		not active		Tox21
Benzophenone-4	DTXSID2042436	not active		not active		Tox21	not active		not active		Tox21	not active		not active		Tox21
Benzothiazole	DTXSID7024586	not active		9.13733e-05		Tox21	not active		not active		Tox21	not active		not active		Tox21
Benzyldimethyldodecylammonium	DTXSID60872947
Benzyldimethylhexadecylammonium	DTXSID3047007
Bezafibrate	DTXSID3029869	6.34398e-05		not active		Tox21	0.000302425	7.4303e-05	9.67254e-07	4.92691e-08	Current study	not active		not active		Tox21
Bicalutamide	DTXSID2022678	3.8258e-05		not active		Tox21	not active		not active		Tox21	4.83658e-05		2.4991e-05		Tox21
Bifenox free acid	DTXSID9073547
Bifonazol	DTXSID9045631	20.6524		not active		Tox21	not active		not active		Tox21	1.64247e-05		not active		Tox21
Bis(4-chlorophenyl)sulfone	DTXSID9024986	not active		not active		Tox21	not active		not active		Tox21	not active		7.50357e-05		Tox21
Bisoprolol	DTXSID6022682
Bisphenol S	DTXSID3022409	not active		not active		Tox21	not active		not active		Tox21	not active		not active		Tox21
Boscalid	DTXSID6034392	4.83954e-06	3.08363e-07	not active		Current study	not active		not active		Tox21	2.7235e-05	1.78745e-06	not active		Current study
Bosentan	DTXSID7046627	3.86518e-05		not active		Tox21	not active		not active		Tox21	4.45695e-05		not active		Tox21
Bromochlorophen	DTXSID90165596
Bromoxynil	DTXSID3022162	not active		5.20129e-05		Tox21	2.85553e-05		not active		Tox21	3.91602e-05		not active		Tox21
Bupirimate	DTXSID6041688	5.47686e-05		4.94392e-05		Tox21	not active		not active		Tox21	not active		not active		Tox21
Bupropion	DTXSID7022706
Caffeine	DTXSID0020232	not active		not active		Tox21	0.000375545	3.01812e-05	not active		Current study	0.00368324	0.000283	not active		Current Study
Carbamazepine	DTXSID4022731	0.0001775	1.27285e-05	not active		Current study	not active		not active		Tox21	0.000151504	1.01798e-05	not active		Current study
Carbaryl	DTXSID9020247	not active		6.26166e-06		Tox21	not active		not active		Tox21	not active		4.93639e-05		Tox21
Carbendazim	DTXSID4024729	5.10021e-06	3.40377e-07	not active		Current study	not active		not active		Tox21	2.55194e-06	2.564e-07	not active		Current study
Celecoxib	DTXSID0022777	2.9003e-05		not active		Tox21	6.89015e-05		not active		Tox21	not active		not active		Tox21
Cetirizine	DTXSID4022787
Chlorfenvinphos	DTXSID7034250	7.27884e-05		not active		Tox21	4.31186e-05		not active		Tox21	6.21654e-05		4.98839e-05		Tox21
Chloridazon	DTXSID3034872	0.000681	7.01493e-05	0.000335	1.35438e-05	Current study	0.00077997	4.39901e-05	3.05423e-05	4.11742e-06	Current study	not active		not active		Current study
Chlormequat	DTXSID4048064
Chlorophene	DTXSID5020154	7.19449e-05		not active		Neale et al. 2017	2.30288e-05		not active		Tox21			7.48615e-05	7.09497e-06	Neale et al. 2017
Chlorothalonil-4-hydroxy	DTXSID90182586	8.16e-05	8.15408e-06	not active		Current study	0.000190161	2.51067e-05	not active		Current study	0.000264802	4.66441e-05	not active		Current study
Chlorotoluron	DTXSID8052853	0.000118447	8.26562e-06	6.11233e-06	2.1817e-07	Current study						0.000173509	2.01705e-05	not active		Current study
Chloroxuron	DTXSID7040287	4.07374e-05		not active		Tox21	not active		not active		Tox21	not active		7.24037e-06		Tox21
Chlorpropham	DTXSID7020764	not active		5.70366e-05		Tox21	not active		not active		Tox21	not active		not active		Tox21
Ciprofloxacin	DTXSID8022824
Citalopram	DTXSID8022826											0.000123		3.58e-05	2e-06	Escher et al. 2013
Clarithromycin	DTXSID3022829	3.40624e-05	4.4246e-06	not active		Current study	not active		not active		Tox21	4.02865e-05	3.22556e-06	not active		Current study
Clofibrate	DTXSID3020336	not active		not active		Tox21	not active		not active		Tox21	not active		not active		Tox21
Clofibric acid	DTXSID1040661	not active		not active		Tox21	0.00124486	0.000310093	1.65583e-05	1.11086e-06	Current study	not active		not active		Tox21
Clomazone	DTXSID1032355	not active		not active		Tox21	not active		not active		Tox21	not active		not active		Tox21
Clonidine	DTXSID6022846	not active		not active		Tox21	not active		not active		Tox21	not active		not active		Tox21
Clopidogrel	DTXSID6022848
Clothianidin	DTXSID2034465	not active		not active		Current study	not active		not active		Tox21	not active		not active		Current study
Clotrimazole	DTXSID7029871	2.74963e-05		not active		Tox21	not active		not active		Tox21	not active		not active		Tox21
Clozapine	DTXSID5022855	1.32333e-05		not active		Tox21	not active		not active		Tox21	3.09772e-05		not active		Tox21
Cotinine	DTXSID1047576	not active		not active		Tox21	not active		not active		Tox21	not active		not active		Tox21
Crotamiton	DTXSID6040664	not active		not active		Tox21	not active		not active		Tox21	not active		not active		Tox21
Cyclamate	DTXSID5041809	not active		not active		Tox21	not active		not active		Tox21	not active		not active		Tox21
Cyclophosphamide	DTXSID5020364
Cyproconazole	DTXSID0032601	not active		not active		Tox21	not active		not active		Tox21	not active		5.46198e-05		Tox21
Cyromazine	DTXSID6023999	not active		not active		Tox21	not active		not active		Tox21	not active		not active		Tox21
Daidzein	DTXSID9022310	not active		4.17608e-05		Tox21	not active		not active		Tox21	not active		4.29466e-05		Tox21
DCOIT	DTXSID5032315	7.38303e-05		not active		Tox21	2.98689e-06		not active		Tox21	2.0547e-06		not active		Tox21
Decylsulfate	DTXSID8042428
DEET	DTXSID2021995	0.000524439	3.09416e-05	not active		Current study	not active		not active		Tox21	0.000558441	2.82698e-05	not active		Current study
Denatonium benzoate	DTXSID9043770	not active		not active		Current study	not active		not active		Current study	7.53256e-05	1.20015e-05	not active		Current study
Desethylatrazine	DTXSID5037494	not active		not active		Tox21	not active		not active		Tox21	not active		not active		Tox21
Desethylterbutylazine	DTXSID80184211	9.4e-05	4.90907e-06	not active		Current study	not active		6.87819e-05	1.1158e-05	Current study	not active		0.000766636	3.69448e-05	Current study
Desisopropylatrazine	DTXSID0037495	not active		not active		Tox21	not active		not active		Tox21	not active		not active		Tox21
Desloratadine	DTXSID1044196	1.12485e-05		not active		Tox21	1.70688e-05		not active		Tox21	not active		not active		Tox21
Desphenyl chloridazon	DTXSID50212792	0.00162	0.000126541	not active		Current study	0.00112867	0.000189046	not active		Current study	not active		0.00106564	5.16469e-05	Current study
Diazepam	DTXSID4020406	not active		not active		Tox21	not active		not active		Tox21	not active		not active		Tox21
Diazinon	DTXSID9020407	0.000289068		1.35415e-05	5.83708e-07	Neale et al. 2017	0.000187786	9.08464e-05	2.99008e-05	4.04124e-06	Current study	not active		not active		Neale et al. 2017
Dichlorophen	DTXSID6021824	3.5928e-05		not active		Tox21	3.56811e-06		not active		Tox21	1.31171e-05		not active		Tox21
Dichlorprop	DTXSID0020440	0.000463521	9.87028e-05	not active		Current study	not active		not active		Tox21	0.000300788	2.89515e-05	not active		Current study
Dichlorvos	DTXSID5020449	not active		not active		Tox21	not active		not active		Tox21	8.4e-05		7.7e-06	3e-07	Escher et al. 2013
Diclofenac	DTXSID6022923	6.61791e-05	7.31363e-06	not active		Current study	4.0986e-05	2.86364e-06	8.55705e-07	4.47832e-08	Current study	4.77582e-05	2.27537e-06	not active		Current study
Didecyldimethylammonium	DTXSID0048004	2.86418e-06		not active		Current study						4.70977e-06		4.27844e-06	4.94127e-07	Current study
Difenoconazole	DTXSID4032372	2.66707e-05		not active		Tox21	1.60225e-05		not active		Tox21	1.51188e-05		not active		Tox21
Diflubenzuron	DTXSID1024049	not active		2.95098e-05		Tox21	not active		not active		Tox21	not active		not active		Tox21
Diflufenican	DTXSID4041494	7.75657e-05	8.61674e-06	3.66394e-05	2.82102e-06	Current study	not active		not active		Tox21	1.74896e-05	4.24609e-06	not active		Current study
Dimethachlor	DTXSID3058111
Dimethachlor ESA	DTXSID20891457
Dimethachlor OA
Dimethenamid	DTXSID4032376	0.000127152	8.99568e-06	not active		Current study	not active		not active		Tox21	0.000252487	2.22486e-05	8.21207e-06	4.01931e-07	Current study
Dimethoate	DTXSID7020479	0.00145075	0.000186158	not active		Current study	not active		not active		Tox21	0.000983574	6.39947e-05	not active		Current study
Dimethylaminophenazone	DTXSID7020504	not active		not active		Tox21	not active		not active		Tox21	not active		not active		Tox21
Diphenhydramine	DTXSID4022949	not active		not active		Tox21	3.601e-05	1.09e-06	not active		Current Study	0.000168617	1e-05	not active		Current Study
Diphenylphosphate	DTXSID1048207	not active		not active		Tox21	not active		not active		Tox21	not active		not active		Tox21
Diuron	DTXSID0020446	5.90451e-05	3.88586e-06	1.9442e-06	4.0494e-08	Current study	not active		not active		Tox21	6.41548e-05	4.58504e-06	3.51519e-05	3.32885e-06	Current study
Dodecyl sulfate	DTXSID1026031	not active		not active		Tox21	7.11948e-05		not active		Tox21	5.42955e-05		not active		Tox21
Dodecylbenzenesulfonic acid	DTXSID6027923	not active		not active		Tox21	2.84536e-05		not active		Tox21	3.07649e-05		not active		Tox21
Dodemorph	DTXSID5041019
Domperidone	DTXSID1045116	1.92257e-05		not active		Tox21	3.10764e-05		not active		Tox21	not active		not active		Tox21
Duloxetine	DTXSID6048385	2.72665e-06	9.00748e-08	not active		Current study	3.07655e-06	2.34069e-07	not active		Current study	4.80199e-06	3.76536e-07	not active		Current study
Ebastin	DTXSID6046472	2.68785e-05		not active		Tox21	not active		not active		Tox21	not active		not active		Tox21
Efavirenz	DTXSID9046029	2.00185e-05		not active		Tox21	not active		not active		Tox21	not active		not active		Tox21
Enalapril	DTXSID5022982	not active		not active		Tox21	not active		not active		Tox21	not active		not active		Tox21
Enrofloxacin	DTXSID1045619	not active		not active		Tox21	not active		not active		Tox21	not active		not active		Tox21
Epoxiconazole	DTXSID1040372	4.7423e-05	4.40591e-06	1.33102e-05	1.05103e-06	Current study	2.64521e-05		not active		Tox21	5.34245e-05	2.58446e-06	not active		Current study
Erythromycin	DTXSID4022991	0.000209842	3.8406e-05	not active		Current study	not active		not active		Tox21	0.000128023	1.07337e-05	not active		Current study
Ethion	DTXSID2024086	not active		3.60615e-05		Tox21	not active		not active		Tox21	0.00925		not active		Escher et al. 2013
Ethofumesate	DTXSID8034580	2.42106e-05	1.84861e-06	not active		Current study	not active		not active		Tox21	0.000126576	1.06879e-05	5.56483e-05	2.04632e-06	Current study
Ethyl 4-(dimethylamino)benzoate	DTXSID2044763	not active		2.97633e-05		Tox21	not active		not active		Tox21	not active		not active		Tox21
Ethyl azinphos	DTXSID5037498	not active		not active		Tox21	not active		not active		Tox21	not active		not active		Tox21
Ethylenethiourea	DTXSID5020601	not active		not active		Tox21	not active		not active		Tox21	not active		not active		Tox21
Etofenprox	DTXSID9032610	not active		not active		Tox21	not active		not active		Tox21	not active		not active		Tox21
Fenofibrate	DTXSID2029874	not active		not active		Tox21	not active		not active		Tox21	not active		4.59339e-05		Tox21
Fenoxycarb	DTXSID7032393	not active		not active		Tox21	not active		not active		Tox21	5.05025e-05		not active		Tox21
Fenpropidin	DTXSID9058157
Fenpropimorph	DTXSID4034601	not active		not active		Tox21	not active		not active		Tox21	2.97252e-05		not active		Tox21
Fenthion	DTXSID8020620	not active		1.13149e-05		Tox21	not active		not active		Tox21	not active		not active		Tox21
Fenuron	DTXSID7037551	not active		not active		Tox21	not active		not active		Tox21	not active		not active		Tox21
Finasteride	DTXSID3020625	not active		not active		Tox21	not active		not active		Tox21	not active		3.3876e-05		Tox21
Fipronil	DTXSID4034609	3.67679e-06	1.35714e-07	not active		Current study	1.84854e-05		not active		Tox21	2.76733e-05	2.83787e-06	not active		Current study
Fipronil desulfinyl	DTXSID0043719
Fipronil sulfide	DTXSID50869644
Fipronil Sulfone	DTXSID6074750
Fluconazole	DTXSID3020627	not active		not active		Tox21	not active		not active		Tox21	not active		not active		Tox21
Flufenacet	DTXSID2032552	not active		not active		Tox21	not active		not active		Tox21	0.000181107	2.74632e-05	5.26371e-05	3.65174e-06	Current study
Flufenoxuron	DTXSID1041978	5.32285e-05		not active		Tox21	not active		2.7074e-05		Tox21	not active		4.97254e-05		Tox21
Flumequine	DTXSID5045623	not active		not active		Tox21	not active		not active		Tox21	not active		not active		Tox21
Fluoxastrobin	DTXSID2034625	2.1359e-05		not active		Tox21	3.10515e-05		not active		Tox21	not active		6.86839e-05		Tox21
Flurtamone	DTXSID5058228
Flusilazole	DTXSID3024235	3.90216e-05		not active		Tox21	not active		not active		Tox21	not active		not active		Tox21
Flutamide	DTXSID7032004	3.56447e-05		not active		Tox21	not active		not active		Tox21	6.79806e-05		not active		Tox21
Fluvoxamine	DTXSID2044002	1.62097e-05		not active		Tox21	2.14511e-05		not active		Tox21	2.68494e-05		not active		Tox21
Furosemide	DTXSID6020648	not active		not active		Tox21	not active		not active		Tox21	not active		not active		Tox21
Gabapentin	DTXSID0020074	not active		not active		Tox21	not active		not active		Tox21	not active		not active		Tox21
Gemfibrozil	DTXSID0020652	not active		not active		Tox21	not active		not active		Tox21	not active		not active		Tox21
Genistein	DTXSID5022308	3.21527e-05	2.16632e-06	1.71662e-05	1.04702e-06	Current study	2.26437e-05		not active		Escher et al. 2019	not active		1.57356e-05	1.19843e-06	Current study
Glibenclamide	DTXSID0037237	not active		not active		Tox21	not active		not active		Tox21	not active		5.44618e-05		Tox21
Glimepiride	DTXSID5040675	not active		not active		Tox21	2.98538e-05		not active		Tox21	not active		2.92614e-05		Tox21
Guanylurea	DTXSID3043811
Hexadecylpyridinium	DTXSID8047979
Hexadecyltrimethylammonium	DTXSID3047978	2.3741e-06	1.0426e-07	not active		Current study						2.22667e-06	5.56788e-08	not active		Current study
Hexazinone	DTXSID4024145	not active		not active		Tox21	not active		not active		Tox21	0.00141		not active		Escher et al. 2013
Hydrochlorothiazide	DTXSID2020713	not active		not active		Tox21	not active		not active		Tox21	not active		not active		Tox21
Hydroxychloroquine	DTXSID8023135
Icaridin	DTXSID0034227	not active		not active		Tox21	not active		not active		Tox21	not active		not active		Tox21
Ifosfamide	DTXSID7020760	not active		not active		Tox21	not active		not active		Tox21	not active		not active		Tox21
Imazalil	DTXSID8024151	2.56742e-05		not active		Tox21	5.7189e-05		not active		Tox21	5.19837e-05		not active		Tox21
Imidacloprid	DTXSID5032442	0.000199199	2.50343e-05	not active		Current study	not active		not active		Tox21	0.00059805	7.0138e-05	not active		Current study
Imidacloprid-guanidine	DTXSID90436011
Imidacloprid-urea	DTXSID1037563
Iminostilbene	DTXSID90871625	1.42112e-05	1.31414e-06	8.56216e-06	3.08887e-07	Current study	7.75038e-05	2.30518e-05	not active		Current study	not active		4.67464e-05	1.40554e-06	Current study
Indometacin	DTXSID9020740	6.97351e-05		not active		Tox21	4.46666e-05	2.80432e-06	6.22244e-07	1.1085e-07	Current study	not active		not active		Tox21
Irgarol	DTXSID3032416	7.95096e-05		not active		Tox21	not active		not active		Tox21	not active		3.17907e-05		Tox21
ISO E Super	DTXSID7031290	not active		not active		Tox21	not active		not active		Tox21	not active		not active		Tox21
Isophorone diamine	DTXSID6027503	not active		not active		Tox21	not active		not active		Tox21	not active		not active		Tox21
Isoproturon	DTXSID1042077	8.63879e-05	7.16435e-06	8.73968e-06	2.33638e-07	Current study	not active		not active		Tox21	5.5533e-05	3.90424e-06	4.26476e-05	3.60125e-06	Current study
Ketamine	DTXSID8023187	not active		not active		Tox21	not active		not active		Tox21
Ketoconazole	DTXSID7029879	1.53131e-05		not active		Tox21	1.06e-05		not active		Tox21	1.37849e-05		not active		Tox21
Ketoprofen	DTXSID6020771	not active		not active		Tox21	not active		not active		Tox21	not active		7.33006e-05		Tox21
Lauramidopropylbetaine	DTXSID4041282
Lauric isopropanolamide	DTXSID00861815
Lauryl diethanolamide	DTXSID5025491	not active		not active		Tox21	not active		not active		Tox21
Lenacil	DTXSID9042093	7.90664e-05	6.07145e-06	not active		Current study	3.26422e-05	5.61184e-06	not active		Current study	8.52464e-05	6.4843e-06	not active		Current study
Lidocaine	DTXSID1045166	not active		not active		Tox21	not active		not active		Tox21	not active		not active		Tox21
Lincomycin	DTXSID3023215
Linuron	DTXSID2024163	not active		3.30984e-06		Tox21	4.41946e-05		not active		Tox21	not active		5.13737e-05		Tox21
Loperamide	DTXSID6045165	1.08571e-05		not active		Tox21	1.22699e-05		not active		Tox21	2.08468e-05		not active		Tox21
Lorazepam	DTXSID7023225	not active		not active		Tox21	not active		not active		Tox21
Losartan	DTXSID7023227	not active		not active		Tox21	0.000176007	4.51634e-05	7.92106e-06	7.09575e-07	Current study	not active		not active		Tox21
L-Thyroxine	DTXSID8023214	not active		2.39025e-05		Tox21	not active		not active		Tox21	not active		not active		Tox21
MCPA	DTXSID4024195	0.0014476	0.000118314	0.00119232	6.51533e-05	Current study	0.000543981	3.27282e-05	3.09957e-05	1.22244e-06	Current study	0.000435939	2.70621e-05	not active		Current study
Mebendazole	DTXSID4040682	not active		7.10175e-06		Tox21	3.66619e-05		not active		Tox21	not active		2.31647e-05		Tox21
Mebeverine	DTXSID6023238
Mecoprop	DTXSID9024194	not active		not active		Tox21	not active		not active		Tox21	not active		not active		Tox21
Mefenamic acid	DTXSID5023243	not active		not active		Tox21	not active		not active		Tox21	not active		2.05417e-05		Tox21
Melamine	DTXSID6020802	not active		not active		Tox21	not active		not active		Tox21	not active		not active		Tox21
Melperon	DTXSID0023298	not active		not active		Tox21	not active		not active		Tox21	not active		not active		Tox21
Memantine	DTXSID5045174	not active		not active		Tox21	not active		not active		Tox21	not active		not active		Tox21
Mepiquat	DTXSID9042122
Metalaxyl	DTXSID6024175	not active		not active		Tox21	not active		not active		Tox21	not active		not active		Tox21
Metamitron	DTXSID7047568	0.000587786	3.21895e-05	0.000310164	1.2487e-05	Current study	not active		not active		Tox21	0.000550661	3.59931e-05	not active		Current study
Metazachlor	DTXSID4058156	0.000188058	6.47161e-05	not active		Current study						0.000118708	5.61131e-06	5.21621e-06	2.37044e-07	Current study
Metazachlor ESA	DTXSID40891454	0.00455	0.000696294	not active		Current study	not active		not active		Current study	not active		not active		Current study
Metconazole	DTXSID4034497	7.31012e-05		not active		Tox21	2.57441e-05		not active		Tox21	2.92957e-05		1.94729e-05		Tox21
Metformin	DTXSID2023270	not active		not active		Tox21	not active		not active		Tox21	not active		not active		Tox21
Methimazol	DTXSID4020820	not active		not active		Tox21	not active		not active		Tox21	not active		not active		Tox21
Methiocarb	DTXSID3032626	5.04297e-05	9.17416e-06	2.25957e-05	4.23186e-06	Current study						5.93507e-05	2.19804e-06	not active		Current study
Methotrexate	DTXSID4020822	7.40132e-05		not active		Tox21	1.51984e-05		not active		Tox21	not active		1.51075e-05		Tox21
Methylchloroisothiazolinone	DTXSID9034286	not active		not active		Tox21	not active		not active		Tox21	not active		not active		Tox21
Methylparaben	DTXSID4022529	not active		8.04616e-05		Tox21	not active		not active		Tox21	not active		not active		Tox21
Metolachlor	DTXSID4022448	8.01404e-05	7.52266e-06	not active		Current study	6.92957e-05	6.39277e-06	not active		Current study	8.81881e-05	7.12541e-06	1.85206e-05	1.08529e-06	Current study
Metolachlor ESA	DTXSID1037567	0.000505842	0.000106777	not active		Current study	not active		not active		Current study	0.000191037	1.09667e-05	not active		Current study
Metolachlor OA	DTXSID6037568	0.00141864	0.00018457	not active		Current study	not active		not active		Current study	0.000992753	0.000219385	not active		Current study
Metoprolol	DTXSID2023309	0.000166		not active		UFZ 2019 (Julia)	0.000230675	4.8e-05	not active		Current Study	0.000788892	0.000109	not active		Current Study
Metoprolol acid	DTXSID70881080	not active		not active		Current study	not active		not active		Current study	not active		not active		Current study
Metribuzin	DTXSID6024204	0.00106553	0.000211062	not active		Current study	not active		not active		Tox21	0.00101543	0.000122805	not active		Current study
Miconazole	DTXSID6023319	not active		1.21963e-05		Tox21	not active		not active		Tox21
Mirtazapine	DTXSID0023325	3.90427e-05		not active		Tox21	not active		not active		Tox21
Monensin	DTXSID4048561
Montelukast	DTXSID9023334
m-Xylene-4-sulfonic acid	DTXSID1047023
Myclobutanil	DTXSID8024315	not active		not active		Tox21	not active		not active		Tox21	not active		not active		Tox21
Mycophenolic acid	DTXSID4041070	1.94775e-05		not active		Tox21	3.42012e-05		not active		Tox21	1.55062e-05		not active		Tox21
N Acetyl mesalazine	DTXSID80199002
N Butylbenzenesulfonamide	DTXSID7027540	not active		not active		Tox21	6.87909e-05		not active		Tox21	not active		not active		Tox21
N Ethyl o toluenesulfonamide	DTXSID5052416	0.000512505	8.0532e-05	not active		Current study	0.000827952	0.000117838	not active		Current study	0.00533903	0.00197883	not active		Current study
N,N-Dimethyldodecylamine N-oxide	DTXSID1020514	1.6019e-05	1.38104e-06	not active		Current study	3.28719e-05	1.27745e-05	not active		Current study	2.67237e-05	1.78333e-06	2.58625e-05	2.329e-06	Current study
N-Acetyl-4-aminoantipyrine	DTXSID40232106
Naproxen	DTXSID4040686	not active		not active		Tox21	not active		5.25867e-06	2.51863e-07	Current study	0.000410711	0.000116	not active		Current Study
N-Cyclohexyl-2-benzothiazole-amine	DTXSID50891506
N-Cyclohexyl-2-benzothiazole-sulfenamide	DTXSID80167226
N-Formyl-4-aminoantipyrine	DTXSID10168241	0.00196696	0.000197315	not active		Current study	not active		not active		Current study	not active		not active		Current study
Nitrendipin	DTXSID0023373	2.4633e-05		not active		Tox21	not active		not active		Tox21	not active		not active		Tox21
Nitrofurantoin	DTXSID7020972	1.0987e-05		not active		Tox21	6.74553e-05		not active		Tox21	2.82208e-05		not active		Tox21
N-Methyl-2-pyrrolidone	DTXSID6020856	not active		not active		Tox21	not active		not active		Tox21	not active		not active		Tox21
Norfloxacin	DTXSID7037680	not active		not active		Tox21	not active		not active		Tox21	not active		not active		Escher et al. 2013
Octyl-methoxycinnamate	DTXSID1025302	not active		not active		Tox21	not active		not active		Tox21	not active		not active		Tox21
Ofloxacin	DTXSID3041085	not active		not active		Tox21	not active		not active		Tox21	not active		not active		Tox21
Ondansetron	DTXSID8023393	not active		not active		Tox21	not active		not active		Tox21	not active		not active		Tox21
Orlistat	DTXSID8023395	not active		not active		Tox21	not active		not active		Tox21	2.30352e-05		not active		Tox21
Oryzalin	DTXSID8024238	2.07424e-05		not active		Tox21	4.08306e-05		not active		Tox21	3.26127e-05		not active		Tox21
Oxadiazone	DTXSID3024239	7.49532e-05		6.31641e-05		Tox21	not active		not active		Tox21	not active		7.03564e-05		Tox21
Oxazepam	DTXSID1021087	not active		not active		Current study	not active		7.32601e-06	4.91213e-07	Current study	not active		not active		Current study
Oxybutynin	DTXSID0023406
Oxypurinol	DTXSID4035209	not active		not active		Tox21	not active		not active		Tox21	not active		not active		Tox21
Paroxetine	DTXSID3023425	1.14274e-05		not active		Tox21	1.32986e-05		not active		Tox21	1.91508e-05		not active		Tox21
Pendimethalin	DTXSID7024245	not active		not active		Tox21	not active		not active		Tox21	not active		not active		Tox21
Pentoxifylline	DTXSID7023437
Perfluorobutanoic acid	DTXSID4059916
Perfluorodecanoic acid	DTXSID3031860	not active		not active		Tox21	not active		not active		Tox21	not active		8.39591e-05		Tox21
Perfluoroheptanoic acid	DTXSID1037303	not active		not active		Tox21	not active		not active		Tox21	0.000298418	2.56919e-05	not active		Current study
Perfluorohexanoic acid	DTXSID3031862	not active		not active		Tox21	not active		not active		Tox21	8.7719e-05		not active		Tox21
Perfluorooctanesulfonamide	DTXSID3038939	not active		not active		Tox21	1.08694e-05		not active		Tox21	1.53256e-05		not active		Tox21
Perfluorooctanesulfonic acid	DTXSID3031864	0.000174125	3.65199e-05	not active		Current study	4.42129e-05		not active		Tox21	8.50651e-05	5.48133e-06	not active		Current study
Perfluorooctanoic acid	DTXSID8031865	0.000198153		not active		Neale et al. 2017	not active		not active		Tox21	not active		not active		Neale et al. 2017
Perfluorotetradecanoic acid	DTXSID3059921
Pethoxamid	DTXSID4057928	2.61091e-05	2.58461e-06	not active		Current study	4.13092e-05	1.32978e-05	not active		Current study	1.865e-05	8.64962e-07	2.89633e-06	1.29304e-07	Current study
Phenazone	DTXSID6021117	not active		not active		Tox21	not active		not active		Tox21	not active		8.14245e-05		Tox21
Phenylbenzimidazole sulfonic acid	DTXSID3038852	not active		not active		Tox21	1.23535e-05		not active		Tox21	1.96614e-05		not active		Tox21
Phthalamic acid	DTXSID0058980
Picolinafen	DTXSID8044339
Picoxystrobin	DTXSID9047542	1.43814e-07	4.06061e-09	not active		Current study	not active		not active		Tox21	7.72213e-05	7.94169e-06	not active		Current study
Pindolol	DTXSID8023476	7.18845e-05	6.51556e-06	not active		Current study	3.22555e-05		not active		Tox21	not active		not active		Tox21
Pioglitazone	DTXSID3037129
Piperonyl butoxide	DTXSID1021166	not active		3.52943e-05		Tox21	not active		not active		Tox21	0.00141		not active		Escher et al. 2013
Pirimicarb	DTXSID1032569	0.000495491	0.000104023	not active		Current study	not active		not active		Tox21	0.000315986	2.51015e-05	not active		Current study
Pirimiphos-methyl	DTXSID0024266	not active		4.06797e-05		Tox21	not active		not active		Tox21	not active		4.14212e-05		Tox21
Pravastatin	DTXSID6023498
Primidone	DTXSID7023510	not active		not active		Tox21	not active		not active		Tox21	not active		not active		Tox21
Prochloraz	DTXSID4024270	4.9003e-05		not active		Tox21	4.46199e-05		not active		Tox21	not active		not active		Tox21
Promethazin	DTXSID7023518	2.53268e-05		not active		Tox21	1.20352e-05		not active		Tox21	not active		not active		Tox21
Propachlor	DTXSID4024274	4.55044e-05		not active		Tox21	3.43202e-05		not active		Tox21	not active		not active		Tox21
Propamocarb	DTXSID1040295	not active		not active		Tox21	not active		not active		Tox21	not active		not active		Tox21
Propanil	DTXSID8022111	not active		3.66173e-05		Tox21	not active		not active		Tox21	not active		not active		Tox21
Propiconazole	DTXSID8024280	not active		not active		Neale et al. 2017	not active		not active		Tox21	not active		not active		Neale et al. 2017
Propoxycarbazone	DTXSID8037704
Propranolol	DTXSID6023525						1.8399e-05	8.14e-07	not active		Current Study	0.00014715	1.66e-05	5.84317e-05	3.88e-06	Current Study
Propylparaben	DTXSID4022527	0.000231895	3.36471e-05	7.82515e-05	2.78182e-06	Current study	3.47671e-05	1.98888e-06	not active		Current study	0.000121766	6.78774e-06	8.3696e-05	6.24428e-06	Current study
Propyphenazone	DTXSID6023529	not active		not active		Tox21	not active		not active		Tox21	not active		not active		Tox21
Propyzamide	DTXSID2020420	not active		not active		Tox21	not active		not active		Tox21	not active		7.08491e-05		Tox21
Prosulfocarb	DTXSID3058119	7.93632e-05	1.81082e-05	4.6108e-05	4.58652e-06	Current study	5.68072e-05	7.82917e-06	1.6162e-05	9.33175e-07	Current study	5.20966e-05	7.54318e-06	not active		Current study
Prothioconazole-desthio	DTXSID3044338	2.13376e-05	1.13942e-06	not active		Current study	7.17149e-05	3.40726e-06			Current study	0.000110964	1.55194e-05	not active		Current study
p-Toluenesulfonamide	DTXSID8029105	not active		not active		Tox21	not active		not active		Tox21	not active		not active		Tox21
Pyraclostrobin	DTXSID7032638	9.22706e-08	1.08876e-08	not active		Current study	1.98886e-05		not active		Tox21	3.85521e-05	4.26529e-06	not active		Current study
Pyrazophos	DTXSID7042352	not active		not active		Tox21	not active		not active		Tox21	not active		4.08689e-05		Tox21
Quinmerac	DTXSID1042364	not active		7.98497e-05		Tox21	not active		not active		Tox21	not active		not active		Tox21
Quinoxyfen	DTXSID2034881	1.8e-05		No effect		Escher et al. 2019	1.87661e-05	3.54027e-06	5.09578e-07	2.60204e-08	Current study	2.1e-05		1.5e-05		Escher et al. 2019
Raloxifene	DTXSID3023550	1.02404e-05		not active		Tox21	not active		not active		Tox21	2.63335e-05		not active		Tox21
Ranitidine	DTXSID8045191	not active		not active		Tox21	not active		not active		Tox21	0.00318		0.002043	0.000161	Escher et al. 2013
Risperidone	DTXSID8045193	not active		not active		Tox21	not active		not active		Tox21	not active		2.08102e-05		Tox21
Ropinirole	DTXSID8045195	not active		not active		Tox21	not active		not active		Tox21	not active		not active		Tox21
Roxithromycin	DTXSID8041117	2.80367e-05		not active		Tox21	not active		not active		Tox21	3.12692e-05		not active		Tox21
Saccharin	DTXSID5021251	not active		not active		Tox21	not active		not active		Tox21	not active		not active		Tox21
Scopolamine-N-butyl	DTXSID1022718	not active		not active		Tox21	not active		not active		Tox21	not active		not active		Tox21
Sertraline	DTXSID6023577
Simazine	DTXSID4021268	not active		not active		Tox21	not active		not active		Tox21	not active		not active		Tox21
Simetryn	DTXSID8037596	not active		not active		Tox21	not active		not active		Tox21	not active		7.99797e-05		Tox21
Sotalol	DTXSID0023589	not active		not active		Tox21	not active		not active		Tox21
Spiroxamine	DTXSID1034212	1.52366e-05	1.02974e-06	not active		Current study	not active		not active		Tox21	3.6808e-05	2.67457e-06	not active		Current study
Sucralose	DTXSID1040245	not active		not active		Tox21	not active		not active		Tox21	not active		not active		Tox21
Sulcotrione	DTXSID9058230
Sulfadimethoxine	DTXSID1023607	not active		not active		Tox21	not active		not active		Tox21	not active		not active		Tox21
Sulfamethazine	DTXSID6021290	not active		not active		Tox21	not active		not active		Tox21	not active		not active		Tox21
Sulfamethoxazole	DTXSID8026064	0.00235349	8.38595e-05	not active		Current study	not active		not active		Tox21	0.00243487	8.7328e-05	not active		Current study
Sulfapyridine	DTXSID3026067	not active		not active		Tox21	not active		not active		Tox21	not active		not active		Tox21
Sulfathiazole	DTXSID8026068	not active		not active		Tox21	not active		not active		Tox21	not active		not active		Tox21
Tacrolimus	DTXSID5046354	2.21349e-05		not active		Tox21	not active		not active		Tox21
Tamoxifen	DTXSID1034187	not active		not active		Tox21	1.80997e-05		not active		Tox21	not active		not active		Tox21
TDCPP	DTXSID9026261	9.4189e-05		not active		Current study	5.91123e-05		not active		Tox21	not active		not active		Current study
Tebuconazole	DTXSID9032113	2.38041e-05	1.44027e-06	not active		Current study	6.01608e-05		not active		Tox21	4.67117e-05	3.7253e-06	not active		Current study
Temazepam	DTXSID8021309	not active		not active		Tox21	not active		not active		Tox21	not active		9.30487e-05		Tox21
Terbinafine	DTXSID2023640	not active		not active		Tox21	not active		not active		Tox21	not active		not active		Tox21
Terbuthylazine	DTXSID4027608	9.24214e-05	1.677e-05	not active		Current study	not active		not active		Tox21	not active		not active		Current study
Terbuthylazine-2-hydroxy	DTXSID20216888
Terbutryn	DTXSID3024318	3.71537e-05	2.26427e-06	not active		Current study	not active		not active		Tox21	7.05035e-05	5.85454e-06	not active		Current study
Tetrabromobisphenol A	DTXSID1026081	not active		not active		Tox21	2.08506e-05		not active		Tox21	4.10715e-05		not active		Tox21
Tetracain	DTXSID1043883
Tetrachlorosalicylanilide	DTXSID4040767	6.04655e-05		3.64836e-05		Tox21	6.00252e-08		not active		Tox21	7.42209e-06		not active		Tox21
Tetradecylsulfate	DTXSID8041292
Tetraglyme	DTXSID7044396	not active		not active		Tox21	not active		not active		Tox21	not active		not active		Tox21
Theophyllin	DTXSID5021336	not active		not active		Tox21	not active		not active		Tox21	not active		not active		Tox21
Thiabendazole	DTXSID0021337	not active		2.67655e-05		Tox21	not active		not active		Tox21	5.00475e-05		not active		Tox21
Thiacloprid	DTXSID7034961	0.000134234	7.64892e-06	not active		Current study	not active		not active		Tox21	0.000339236	3.08878e-05	not active		Current study
Thiacloprid amide	DTXSID60583566	0.000345829	4.2541e-05	not active		Current study	0.00108519	0.000172641	0.000190549	2.15747e-05	Current study	0.00398883	0.000371835	0.000827952	7.1265e-05	Current study
Thiamethoxam	DTXSID2034962	not active		not active		Current study	not active		not active		Tox21	not active		not active		Current study
TMDD	DTXSID7027041	not active		not active		Tox21	not active		not active		Tox21	not active		not active		Tox21
Tramadol	DTXSID90858931
Tri(butoxyethyl)phosphate	DTXSID5021758	not active		not active		Tox21	not active		not active		Tox21	0.000150437	2.87282e-05	not active		Current study
Triadimenol	DTXSID0032493	not active		4.3823e-05		Tox21	not active		not active		Tox21	not active		not active		Tox21
Triallate	DTXSID5024344	not active		not active		Tox21	not active		not active		Tox21	not active		not active		Tox21
Triclocarban	DTXSID4026214	5.94292e-06		not active		Neale et al. 2017	9.26516e-06		not active		Tox21	2.09894e-05		4.8119e-06	3.95199e-07	Neale et al. 2017
Triclosan	DTXSID5032498	1.24165e-05		not active		Neale et al. 2017	6.72367e-06		not active		Tox21	6.1e-05		4.6e-05		Escher et al. 2019
Tricresylphosphate	DTXSID4021391	not active		5.25134e-05		Tox21	not active		not active		Tox21	not active		7.15377e-05		Tox21
Triethylcitrate	DTXSID0040701	not active		not active		Tox21	not active		not active		Tox21	not active		not active		Current study
Triethylphosphate	DTXSID8026228	not active		not active		Tox21	not active		not active		Tox21	not active		not active		Tox21
Trifloxystrobin	DTXSID4032580	4.4131e-05		not active		Tox21	2.38526e-05		not active		Tox21	4.43163e-05		not active		Tox21
Triglyme	DTXSID8026224	not active		not active		Tox21	not active		not active		Tox21	not active		not active		Tox21
Tri-isobutylphosphate	DTXSID8040698	not active		not active		Tox21	not active		not active		Tox21	not active		not active		Tox21
Trimethoprim	DTXSID3023712	0.000156878	1.28713e-05	not active		Current study	not active		not active		Tox21	not active		0.000197239	7.59233e-06	Current study
Trimethyloctylammonium	DTXSID10165674
Triphenylphosphate	DTXSID1021952	not active		not active		Neale et al. 2017	not active		1.60175e-06	9.79496e-08	Current study	not active		not active		Neale et al. 2017
Triphenylphosphine oxide	DTXSID2022121	not active		not active		Tox21	not active		not active		Tox21	0.00149343	0.000224371	0.0010469	0.000129394	Current study
Tris(1-chloro-2-propyl)phosphate	DTXSID5026259	not active		not active		Tox21	5.17809e-05		not active		Tox21	not active		not active		Tox21
Tris(2-chloroethyl)phosphate	DTXSID5021411	not active		not active		Tox21	not active		not active		Tox21	not active		not active		Tox21
Valsartan	DTXSID6023735	not active		not active		Tox21	not active		not active		Tox21
Vardenafil	DTXSID3048318
Verapamil	DTXSID9041152	1.54565e-05		not active		Tox21	not active		not active		Tox21	4.59647e-05		not active		Tox21
Ziprasidone	DTXSID4023753	not active		not active		Tox21	not active		not active		Tox21	not active		not active		Tox21
References
Escher, B.I., van Daele, C., Dutt, M., Tang, J.Y.M., Altenburger, R., 2013. Most oxidative stress response in water samples comes from unknown chemicals: The need For effect-based water quality trigger values. Environmental Science & Technology. 47, 7002-7011.
Neale, P.A., Altenburger, R., Ait-Aissa, S., Brion, F., Busch, W., Umbuzeiro, G.D., Denison, M.S., Du Pasquier, D., Hilscherova, K., Hollert, H., Morales, D.A., Novak, J., Schlichting, R., Seiler, T.B., Serra, H., Shao, Y., Tindall, A.J., Tollefsen, K.E., Williams, T.D., Escher, B.I., 2017. Development of a bioanalytical test battery for water quality monitoring: Fingerprinting identified micropo…

## Sheet: Table S6
Table S6: IC10 and EC values for all water extracts in units of relative enrichment factor (REF).
			Activation of AhR					Binding to PPARγ					Activation of ER					Oxidative Stress Response
Site ID	Sample ID	Sample Data	IC10 (REF)	SE	EC10 (REF)	SE	BaP-BEQbio,iceberg (ngBaP/L)	IC10 (REF)	SE	EC10 (REF)	SE	Rosiglitazone-EQbio,iceberg (ngrosiglitazone/L)	IC10 (REF)	SE	EC10 (REF)	SE	EEQbio,iceberg (ngE2/L)	IC10 (REF)	SE	ECIR1.5 (REF)	SE	Dichlorvos-EQbio,iceberg (µgDichlorvos/L)
1	a	2018-04-15	>100		48.1464	1.50142	4.39	>100		41.5455	3.89737	3.99	>100		>100			>100		79.2393	5.07081	21.48
2	a	2018-06-01	15.4727	2.19534	0.912409	0.06083	231.72	11.609	0.750799	1.51976	0.166503	109.13	11.6754	0.518953	0.176897	0.0260761	18.34	N/A		5.75573	0.274104	295.65
	b	2018-06-10	23.245	8.21842	2.60417	0.133192	81.19	25.3165	1.20429	2.60485	0.343128	63.67	19.1755	2.24664	1.15902	0.215872	2.8	12.7584	1.11452	Cytotoxic
	c	2018-07-07	27.1297	5.16759	1.28634	0.0919003	164.36	17.5994	1.37091	1.29921	0.213524	127.66	22.0313	2.6521	1.19861	0.232021	2.71	13.0378	1.07073	7.06015	0.616991	241.03
3	a	2018-05-24	16.5975	0.968854	7.35294	0.354022	28.75	14.6994	0.849596	2.05677	0.173907	80.64	21.2089	2.39348	0.36062	0.0509654	9	26.6312	3.12269	10.5686	0.939356	161.01
	b	2018-05-31	29.5247	2.77725	2.55232	0.139277	82.84	26.8889	1.34553	0.968054	0.162873	171.33	22.2124	1.15009	N/A			24.7647	1.74359	10.4559	0.729419	162.75
	c	2018-06-11	29.3945	8.9082	2.30203	0.118122	91.84	30.248	2.98363	1.12625	0.131284	147.26	22.8415	3.09753	1.41804	0.0916939	2.29	23.7304	3.93405	12.3031	1.3726	138.31
	d	2018-07-03	89.9281	69.6538	1.17523	0.156623	179.9	22.1631	1.25699	1.04145	0.10485	159.25	32.144	5.59705	1.98926	0.15975	1.63	13.8523	1.36413	9.93049	0.819093	171.36
4	a	2018-05-15	29.0698	11.0786	3.21337	0.275904	65.8	23.4467	1.45133	2.86287	0.339643	57.93	28.3126	2.4545	6.6313	0.4758	0.49	24.2189	2.59669	6.91467	0.429741	246.1
	b	2018-05-28	12.0265	1.67199	2.88268	0.334221	73.34	8.69565	0.528544	2.24065	0.164321	74.02	20.7168	0.984552	8.92857	0.763074	0.36	26.001	2.3547	7.68167	0.277102	221.53
5	a	2018-05-15	17.6398	4.07	2.62329	0.163096	80.6	26.5604	1.68745	4.41112	0.441501	37.6	30.9981	2.67895	6.13497	1.21984	0.53	33.9443	5.83829	22.0167	3.3408	77.29
	b	2018-05-28	12.0992	1.66886	2.27324	0.207842	93.01	10.9242	0.55862	1.68663	0.205786	98.34	17.0882	1.25825	7.32601	0.336352	0.44	28.4495	2.51958	13.048	1.20265	130.42
	c	2018-06-06	14.2288	1.24775	4.91159	0.248716	43.05	12.4425	0.532408	2.91375	0.372369	56.92	16.3934	1.18248	4.90918	0.341016	0.66	13.4608	1.19587	Cytotoxic
	d	2018-07-02	35.9454	10.7513	1.55376	0.183356	136.07	27.2405	2.03618	2.13083	0.202459	77.84	21.5424	2.01827	1.32415	0.063525	2.45	24.3843	2.71254	Cytotoxic
6	a	2018-05-27	8.82613	1.45986	2.39808	0.339067	88.17	6.23441	0.379778	1.51722	0.187218	109.31	6.45995	0.517046	Cytotoxic			6.22278	0.562257	Cytotoxic
	b	2018-06-11	6.50195	0.699234	2.6448	0.18138	79.94	11.9161	0.781533	0.584112	0.0648255	283.94	9.14077	0.832361	1.68407	0.16489	1.93	6.48088	0.513682	Cytotoxic
	c	2018-07-02	14.3823	1.50649	1.36426	0.120401	154.98	20.3046	1.50027	1.72354	0.240084	96.23	13.5245	0.688479	2.75862	0.203339	1.18	11.6537	2.06699	Cytotoxic
7	a	2018-05-23	19.5618	2.32048	5.64016	0.343563	37.49	28.169	1.65047	2.61301	0.337159	63.47	19.8728	1.6508	0.0876424	0.0267843	37.02	21.7108	1.52202	8.1182	1.00176	209.62
8	a	2018-05-13	22.805	5.47632	5.10204	0.157122	41.44	23.5183	1.59186	4.47828	0.423963	37.04	24.5098	4.31324	6.08643	0.349071	0.53	14.0588	1.52644	5.46329	0.263315	311.48
	b	2018-05-22	49.2611	17.3457	5.82072	0.356426	36.32	31.2402	1.67669	7.59301	2.02134	21.84	27.4876	1.9199	8.64304	5.33747	0.38	24.1138	1.94678	5.0221	0.466193	338.84
	c	2018-05-29	15.8881	3.78902	0.834028	0.0521981	253.5	17.5932	1.26966	3.13775	0.221621	52.86	24.6488	1.58027	0.342583	0.0273926	9.47	N/A		6.0241	0.338003	282.48
9	a	2018-04-15	>100		10.3702	1.05412	20.39	61.0128	16.5133	5.23286	0.321201	31.69	14.4697	1.05817	7.32064	0.422947	0.44	88.8099	31.5804	12.2639	0.476479	138.76
	b	2018-05-31	27.8474	7.85559	3.85208	0.211746	54.89	23.7079	1.45575	1.64636	0.218928	100.74	23.6351	1.52614	1.61342	0.294935	2.01	27.2405	5.99054	4.75285	0.269991	358.04
10	a	2018-05-15	63.1712	23.7201	8.98473	0.232166	23.53	45.6204	6.26032	12.2986	1.46567	13.49	87.108	19.0606	21.0393	2.50454	0.15	55.6174	8.60863	17.2058	0.597999	98.9
	b	2018-05-31	69.3001	23.1625	5.96659	0.236029	35.44	36.062	2.72188	9.5511	1.90201	17.37	23.0256	1.38588	Cytotoxic			38.9864	9.90238	10.2522	0.904557	165.98
	c	2018-06-10	34.1763	4.16984	1.27649	0.15952	165.63	31.6857	2.33325	10.2764	0.909471	16.14	28.4091	1.41238	2.331	0.128232	1.39	46.4253	12.7637	17.1233	1.08838	99.38
11	a	2018-04-15	85.6164	15.2174	7.64526	0.230994	27.65	41.5282	5.60838	6.21118	0.45793	26.7	38.7898	3.20941	Cytotoxic			>100		13.8007	0.327515	123.31
	b	2018-05-10	49.3097	8.29365	4.79386	0.440089	44.1	28.8184	4.49883	1.35044	0.171153	122.82	15.5135	1.66543	2.60349	0.129598	1.25	36.1795	8.30923	6.12595	0.233795	277.79
	c	2018-05-15	37.8931	6.7013	4.64468	0.417007	45.52	48.4966	12.6745	3.9185	0.308935	42.33	16.7926	2.13242	11.302	1.0487	0.29	29.7974	2.46388	7.22439	0.225364	235.55
	d	2018-05-31	51.2033	51.7801	3.40716	0.127347	62.05	7.3046	0.444839	1.44446	0.248915	114.82	3.09598	0.23771	0.761035	0.197962	4.26	20.1572	4.44507	2.4975	0.129491	681.36
12	a	2018-04-15	>100		9.70874	0.963333	21.78	62.0732	11.1585	5.55864	0.294494	29.84	60.024	10.4195	30.8737	7.06979	0.11	>100		12.8568	0.374232	132.36
	b	2018-05-10	41.6667	3.27257	4.65116	0.145203	45.46	33.557	3.38611	5.38503	0.313764	30.8	24.9128	1.50631	2.81373	0.140607	1.15	51.5464	10.9204	12.5188	0.399636	135.93
	c	2018-05-15	33.3	3.07274	2.30203	0.0920492	91.84	33.4113	2.71823	2.89939	0.343404	57.2	41.1015	7.3807	6.41026	0.315459	0.51	43.8596	9.35095	9.51113	0.381024	178.92
	d	2018-05-31	>100		3.65631	0.2909	57.83	25.4001	3.88065	3.72856	0.687462	44.48	24.2777	1.13638	>6.3			26.5463	3.11269	4.98008	0.38675	341.7
13	a	2018-05-29	37.1609	12.4491	2.43309	0.154688	86.9	21.7865	1.189	3.16857	0.533717	52.34	21.3538	2.61052	0.259673	0.0405254	12.49	47.6644	14.6628	6.1222	0.348426	277.96
14	a	2018-05-10	79.3021	14.741	17.2652	1.33424	12.25	>100		12.8601	0.901165	12.9	84.4595	15.6721	10.6963	0.585672	0.3	>100		22.5734	0.562653	75.39
	b	2018-05-31	66.1376	27.2511	7.25163	0.318725	29.16	39.557	2.76805	8.26446	0.697357	20.07	57.8704	6.94244	Cytotoxic			58.4454	14.1348	14.1965	1.28744	119.87
15	a	2018-04-15	>100		89.4454	5.95556	2.36	>100		69.8812	15.0457	2.37	>100		>100			>100		92.4044	6.96064	18.42
	b	2018-05-10	47.3037	5.78206	3.15557	0.102663	67	37.0096	4.50087	3.05623	0.172147	54.27	30.7503	2.82918	4.14594	0.359074	0.78	48.3325	12.5538	6.46245	0.189605	263.32
	c	2018-05-15	30.5717	1.22062	4.79157	0.18241	44.12	31.0849	3.36165	5.49451	1.07837	30.19	41.425	8.21465	0.938967	0.101214	3.46	61.8047	13.2739	11.2943	0.377328	150.67
	d	2018-05-31	35.1865	7.36787	4.38596	0.162473	48.21	29.6121	1.58276	3.06843	0.54646	54.05	29.9043	2.22673	11.2752	3.24056	0.29	46.6636	14.3736	4.91159	0.256773	346.47
16	a	2018-04-15	>100		25.3357	1.64518	8.35	>100		35.6888	2.8467	4.65	>100		>100			>100		52.4714	2.08972	32.43
17	a	2018-05-13	25.6148	4.38088	2.72851	0.155745	77.49	13.9743	1.12599	2.44141	0.284493	67.93	13.1735	1.06936	5.76701	0.477591	0.56	27.6396	8.63259	7.71367	0.241811	220.61
	b	2018-05-27	10.9421	0.801592	0.753012	0.0962812	280.78	11.396	0.781033	3.52609	0.600281	47.04	14.0984	1.14469	Cytotoxic			54.5256	12.3084	6.68003	0.434626	254.74
	c	2018-06-01	44.0723	26.5327	1.09866	0.19687	192.44	6.9541	0.592404	1.46908	0.117643	112.9	6.64894	0.913345	0.734214	0.113097	4.42	10.9697	1.12814	5.37577	0.403428	316.55
18	a	2018-05-16	20.3335	3.48621	2.93083	0.222733	72.14	13.2223	0.954912	1.53492	0.280361	108.05	11.0011	0.499709	Cytotoxic			10.1133	0.436012	Cytotoxic
	b	2018-05-22	>100		7.98722	0.433619	26.47	24.5399	1.28932	4.90436	0.741067	33.82	21.8627	2.1423	1.33067	0.166073	2.44	20.6228	2.10183	Cytotoxic
	c	2018-06-04	53.8503	27.2934	16.7757	1.23461	12.6	17.0911	1.4173	Cytotoxic			29.5508	2.5857	15.1837	2.71813	0.21	70.373	16.8628	29.6033	1.51031	57.48
19	a	2018-06-11	28.8351	5.86928	0.422833	0.0424442	500.03	38.2848	3.98092	4.95295	0.524733	33.49	26.0349	2.29305	Cytotoxic			30.3122	5.10594	2.30947	0.0779352	736.84
20	a	2018-04-14	59.1716	8.36455	7.96813	0.732687	26.53	37.1058	4.97176	5.42005	0.296414	30.6	39.8565	4.67984	14.5751	0.691474	0.22	>100		16.0565	0.474219	105.98
	b	2018-07-23	12.9988	0.69852	5.23834	0.209205	40.36	16.284	0.918278	2.886	0.459012	57.47	18.1521	1.72526	3.11624	1.57414	1.04	16.8805	2.34572	7.66871	0.399314	221.9
	c	2018-09-07	31.1624	4.20192	9.98004	0.442727	21.19	N/A					N/A					4.37254	0.589825	2.0842	0.197039	816.48
21	a	2018-04-14	33.3667	1.93387	4.51875	0.123679	46.79	26.9324	2.03099	3.71609	0.358628	44.63	29.6912	3.41343	6.41026	0.222304	0.51	75.4148	18.666	8.35003	0.234967	203.8
	b	2018-05-13	32.2269	7.59404	3.23415	0.111919	65.37	23.3481	1.38028	4.05844	0.46761	40.87	34.5781	4.29836	Cytotoxic			33.1126	6.64664	8.59254	0.777006	198.04
	c	2018-06-01	26.1165	1.69085	3.36587	0.189762	62.82	N/A					N/A					30.8356	4.41949	6.42343	0.181959	264.92
	d	2018-06-08	27.2628	7.55896	2.32666	0.0870469	90.87	11.919	0.73119	0.294898	0.0443956	562.41	5.32481	0.297997	>1.5			6.16143	0.363915	Cytotoxic
	e	2018-06-13	25.4323	5.43186	0.579039	0.0984735	365.14	11.9674	0.701204	1.52882	0.135165	108.49	8.93655	0.805008	0.636537	0.0612632	5.1	9.27644	1.2512	Cytotoxic
	f	2018-07-05	12.4085	1.09073	0.578369	0.052284	365.56	11.5128	3.56676	0.209864	0.0543047		6.09756	0.236875	0.81367	0.182728	3.99	N/A		3.53357	0.1795	481.58
22	a	2018-04-14	64.0205	9.77931	12.7259	0.420903	16.61	51.2295	5.9654	10.3295	0.544484	16.06	>100		10.5452	0.698342	0.31	>100		23.9578	0.961068	71.03
	b	2018-05-13	38.1388	10.3158	9.01713	0.256935	23.45	28.1532	1.59075	5.84112	1.26922	28.39	>100		45.6413	6.28895	0.07	57.1102	28.18	17.7117	0.686382	96.08
	c	2018-05-14	50.3525	6.05447	10.2859	0.739441	20.55	68.2128	7.10046	13.6893	2.22064	12.12	94.2507	17.1801	18.3688	1.86489	0.18	>100		19.8413	0.873961	85.77
	d	2018-07-17	21.2811	2.40075	5.98802	0.377568	35.31	36.075	16.7101	6.09385	0.688853	27.22	22.1533	1.47672	0.518941	0.15684	6.25	N/A		7.05418	0.413915	241.23
	e	2018-08-20	34.4828	11.6017	3.72024	0.162207	56.83	N/A					N/A					>3.8		1.15314	0.062763	1475.71
23	a	2018-04-14	80.2568	10.0224	10.7735	0.387671	19.62	39.2311	4.92505	6.2383	0.637062	26.59	45.7875	4.49699	11.7302	1.24512	0.28	>100		23.663	0.679542	71.91
	b	2018-05-13	21.7865	6.49798	3.62319	0.145584	58.35	10.1153	0.428207	2.98775	0.381257	55.51	26.5322	2.90172	6.13497	0.561557	0.53	6.94927	0.841736	Cytotoxic
	c	2018-05-14	31.211	3.67927	2.08247	0.19953	101.53	31.8674	5.2239	4.22119	0.348885	39.29	36.8189	7.9738	6.1237	0.35396	0.53	31.4861	6.27839	10.48	0.424603	162.38
	d	2018-06-11	27.2628	3.85009	1.62522	0.152115	130.09	26.455	1.26186	2.43487	0.278643	68.12	21.2089	2.36829	10.6712	1.7104	0.3	17.6491	2.55299	10.7805	0.80819	157.85
	e	2018-07-06	29.577	5.0721	2.87853	0.19273	73.45	23.1589	0.785728	3.08928	0.532727	53.69	21.8007	1.31698	3.56506	2.57498	0.91	N/A		8.62218	0.399513	197.36
	f	2018-07-17	28.7604	2.6676	3.03767	0.16554	69.6	33.8181	4.5918	6.01323	0.815384	27.58	32.0205	4.87741	>6.3			N/A		16.5289	0.997746	102.95
24	a	2018-04-14	21.7533	2.30499	4.74158	0.549925	44.59	20.2388	0.810208	1.56961	0.132127	105.67	16.9808	1.56573	0.895255	0.0639502	3.62	25.582	5.32909	7.98212	0.439756	213.19
	b	2018-05-13	49.505	32.7664	4.61042	0.125325	45.86	22.4417	1.39253	4.20521	0.912132	39.44	41.3052	5.98337	11.0302	2.75938	0.29	14.4844	1.56697	8.60733	0.817022	197.7
	c	2018-06-13	86.9565	57.2401	0.502765	0.0841228	420.53	37.2717	5.84289	1.57431	0.223085	105.35	23.4962	1.94661	5.67537	0.573335	0.57	92.5069	90.1964	9.78474	0.282628	173.91
	d	2018-07-23	10.2187	0.854898	1.67084	0.106867	126.54	26.3644	2.05674	4.11692	0.448471	40.29	18.3217	2.20848	0.303767	0.0486562	10.68	36.8868	4.16218	4.41696	0.123495	385.26
25	a	2018-04-14	>100		9.38967	0.670414	22.52	73.8552	13.9038	8.726	0.668917	19.01	>100		16.1368	1.83112	0.2	>100		16.4204	0.482041	103.63
	b	2018-06-08	45.9348	15.6963	3.04599	0.286043	69.41	25.9067	0.832237	2.49938	0.323901	66.36	27.4499	2.89418	0.587544	0.188415	5.52	35.0754	4.61603	Cytotoxic
	c	2018-06-13	83.0565	51.4205	7.54148	0.302569	28.04	39.8248	5.60973	1.72058	0.270017	96.39	27.6855	3.1403	10.0634	3.63769	0.32	40.4531	8.69447	19.7394	1.43	86.21
26	a	2018-04-14	47.1032	5.04312	5.05561	0.172601	41.82	28.0978	2.30135	3.56633	0.283373	46.51	24.8201	1.42427	1.95733	0.0875033	1.66	42.517	5.80632	14.1363	0.358782	120.38
	b	2018-05-14	53.4188	26.7465	4.4603	0.134346	47.4	26.5816	2.37906	3.0175	0.366216	54.96	>100		>25			26.3574	2.78163	10.2712	0.517989	165.68
	c	2018-07-17	47.5511	8.1626	4.93827	0.352873	42.81	37.8358	8.50625	6.82594	0.96728	24.3	>50		1.11907	0.336622	2.9	N/A		3.33556	0.127926	510.17
	d	2018-08-20	>50		3.46141	0.159591	61.08	N/A					N/A					3.76648	0.701232	1.16686	0.060399	1458.36
27	a	2018-04-14	45.1264	4.81606	2.89687	0.239504	72.98	45.9137	25.1071	2.94985	0.153323	56.22	49.8008	14.5137	2.18866	0.173694	1.48	56.6893	16.8333	9.3932	0.337047	181.16
	b	2018-05-14	8.43882	0.922929	2.06101	0.122378	102.58	14.4991	0.908793	2.36295	0.238417	70.19	13.9704	0.990301	0.551572	0.0320964	5.88	23.1965	3.3124	5.02513	0.241408	338.64
	c	2018-06-10	>100		4.30478	0.291865	49.11	51.1509	4.36156	7.0373	0.868643	23.57	98.912	36.0133	Cytotoxic			60.1685	15.7625	29.5508	2.00673	57.59
	d	2018-07-17	59.4884	9.85575	9.0009	0.329979	23.49	29.18	1.94988	16.5673	3.73834	10.01	24.2072	2.12655	3.82555	2.10742	0.85	N/A		3.0175	0.279169	563.94
	e	2018-08-20	12.4595	2.91229	2.84333	0.197667	74.36	N/A					N/A					0.823723	0.0804725	0.569995	0.0642317	2985.46
	f	2018-09-07	>50		4.20875	0.201404	50.24	N/A					N/A					>3.8		0.946253	0.0498914	1798.36
28	a	2018-04-14	61.9963	9.55888	9.80392	1.78105	21.57	21.5703	1.27161	9.25069	0.956732	17.93	24.6427	2.28695	Cytotoxic			49.8753	10.3333	11.6306	0.426645	146.31
29	a	2018-05-10	31.4367	2.43113	8.92857	0.334901	23.68	25.6279	1.49091	3.54108	0.379186	46.84	16.0772	1.25697	8.75657	0.42855	0.37	70.7714	20.2948	14.6156	0.542585	116.43
30	a	2018-06-10	0.809061	0.0683382	0.4649	0.0700484	454.78	1.03885	0.0516729	0.264061	0.032849	628.09	1.18078	0.095993	Cytotoxic			0.286205	0.0266873	Cytotoxic
31	a	2018-04-15	67.0691	26.0404	5.67859	0.58108	37.23	24.9875	2.25212	1.58353	0.117906	104.74	18.8147	1.78058	4.93097	0.452492	0.66	13.7268	1.63309	Cytotoxic
	b	2018-06-03	5.6243	1.25582	1.03745	0.0877082	203.79	6.06061	0.466116	0.635728	0.0863668	260.89	4.87567	0.252223	0.247219	0.0195147	13.12	N/A		Cytotoxic
	c	2018-06-10	7.46269	0.730675	1.78317	0.149668	118.57	18.3217	0.934214	0.615764	0.0415944	269.35	9.93049	0.632514	0.602773	0.0567893	5.38	6.26959	1.2547	Cytotoxic
	d	2018-06-26	4.97018	0.385856	1.46499	0.0536117	144.32	6.90131	0.352448	0.376364	0.0366307	440.68	6.07533	0.318531	0.201816	0.0202753	16.08	3.67242	0.243974	Cytotoxic
32	a	2018-05-16	19.972	2.90466	4.07332	0.342955	51.91	25.8398	0.891373	4.86145	1.27716	34.12	22.6296	1.38727	*			47.8011	9.3523	13.9821	0.598619	121.71
	b	2018-05-25	>100		6.21504	0.336516	34.02	26.0078	1.60579	3.10078	0.395842	53.49	23.4962	1.92287	2.99491	0.666253	1.08	22.7998	1.52467	Cytotoxic
	c	2018-05-31	29.5683	6.52741	8.94454	0.353141	23.64	24.888	1.37138	5.53097	0.587666	29.99	27.3299	2.44766	8.60585	2.31588	0.38	28.4981	2.0734	14.9388	0.67307	113.91
33	a	2018-04-15	90.5797	15.8597	7.26744	0.282089	29.09	74.129	19.3153	7.60456	0.596221	21.81	67.6133	20.7366	12.8156	1.94295	0.25	>100		15.9642	0.418781	106.59
	b	2018-05-20	6.36132	0.623992	Cytotoxic			22.3514	1.58917	7.45156	1.18936	22.26	25.8264	2.48326	2.92483	0.350997	1.11	56.0224	11.3991	15.8529	1.23697	107.34
	c	2018-05-25	49.7265	14.1044	5.71429	0.275951	37	44.3262	5.18711	10.0614	0.952687	16.48	35.7654	3.30536	1.69405	0.239802	1.92	34.3761	5.21727	11.7316	0.807888	145.05
34	a	2018-06-08	28.6287	7.65344	3.47102	0.166623	60.91	22.7015	1.38528	4.363	0.565934	38.01	20.9908	2.40354	Cytotoxic			12.9416	0.742465	Cytotoxic
35	a	2018-05-17	46.8165	56	7.27802	0.242495	29.05	2.80269	0.223713	0.984252	0.0781202	168.51	1.45688	0.101094	0.246975	0.0206412	13.14	5.73723	0.399928	Cytotoxic
36	a	2018-05-16	57.241	39.7771	8.88889	0.315101	23.79	26.0756	2.06565	3.59842	0.580486	46.09	48.9476	7.69553	0.626174	0.0594414	5.18	14.0252	1.34902	Cytotoxic
	b	2018-05-17	26.0213	6.0967	8.77963	0.478448	24.08	21.2811	1.07198	2.89771	0.329068	57.24	20.4165	1.55104	0.924214	0.19663	3.51	24.5098	2.06591	13.5099	0.647568	125.96
	c	2018-06-07	48.0307	18.6286	6.0241	0.608942	35.1	19.9681	0.929423	4.40917	0.43839	37.62	25.4388	2.74643	0.643501	0.0976846	5.04	23.2612	4.07653	Cytotoxic
	d	2018-06-12	43.4216	8.67678	5.67537	0.600391	37.25	35.3857	3.58991	4.30108	0.377385	38.56	32.9164	6.82706	2.03128	0.143795	1.6	27.465	3.31375	22.3714	1.34729	76.07
37	a	2018-04-15	>100		7.83699	0.398114	26.98	58.9275	11.4973	5.81058	0.491924	28.54	70.6215	11.6755	12.8386	2.0851	0.25	>100		14.3062	0.510028	118.95
	b	2018-05-16	27.7162	4.19891	3.49895	0.14532	60.43	21.9877	1.15498	3.01296	0.365113	55.05	15.6568	1.1563	0.13598	0.0303432	23.86	21.2766	1.46944	7.63359	0.648331	222.92
	c	2018-06-07	26.448	3.71224	4.1806	0.297291	50.57	25.2589	2.01931	2.72702	0.255598	60.82	26.824	2.53922	0.249128	0.028165	13.02	N/A		16.4204	0.668678	103.63
	d	2018-06-12	39.5413	10.2832	3.07882	0.23129	68.67	38.625	3.79984	5.24109	0.623822	31.65	41.511	5.25909	22.7687	1.30795	0.14	61.1247	19.9589	19.5618	0.916864	86.99
38	a	2018-05-11	39.4322	5.20579	10.6304	0.44298	19.89	22.2965	1.08823	3.20924	0.257481	51.68	17.1321	1.18284	12.486	4.34335	0.26	22.6757	2.6054	Cytotoxic
	b	2018-05-18	47.4834	19.7893	22.9095	2.20015	9.23	34.9284	3.37938	4.88998	0.417262	33.92	30.1568	2.52095	0.71582	0.0810613	4.53	31.3972	4.20929	Cytotoxic
	c	2018-05-25	12.4657	0.334719	Cytotoxic			11.9332	0.801146	3.63372	0.570014	45.64	20.8073	1.24428	2.70563	0.23418	1.2	27.1592	1.75627	22.8728	2.22241	74.4
	d	2018-06-03	18.6811	4.7741	1.66806	0.106678	126.75	10.174	0.589695	1.02333	0.0970343	162.07	10.7181	0.763594	0.478011	0.10328	6.79	N/A		6.19732	0.160617	274.59
	e	2018-06-14	20.2881	2.05309	3.27976	0.333678	64.46	11.3882	0.432911	2.15517	0.218908	76.96	10.6633	0.396489	Cytotoxic			5.35906	0.974739	Cytotoxic
39	a	2018-05-24	>100		43.3463	2.40124	4.88	>100		49.3827	7.09892	3.36	>100		>100			>100		28.4738	2.54902	59.76
40	a	2018-04-15	36.2319	5.23262	5.75705	0.272573	36.72	24.3132	1.30699	2.24014	0.179151	74.04	26.9978	2.66407	7.24638	1.57687	0.45	27.9096	2.3937	20.016	0.772435	85.02
	b	2018-05-11	29.9491	2.44867	3.48189	0.237744	60.72	12.7502	0.897864	1.75039	0.15301	94.75	28.5063	10.3039	1.22399	0.147493	2.65	24.2072	4.927	7.11946	0.238836	239.02
41	a	2018-04-15	>100		10.4134	0.245289	20.3	93.8086	16.7729	14.8987	0.906751	11.13	>100		22.5683	1.81117	0.14	>100		23.8892	0.768151	71.23
	b	2018-05-16	52.6593	14.378	13.6277	0.680456	15.51	51.1771	5.67295	20.1167	2.98209	8.24	74.9625	16.4929	0.165782	0.0282809	19.57	>100		12.219	0.173968	139.27
42	a	2018-05-24	10.2438	2.38938	Cytotoxic			6.8306	0.346709	2.07771	0.257285	79.83	8.62069	0.631317	1.4892	0.0931445	2.18	13.2556	1.91173	Cytotoxic
	b	2018-05-16	15.2695	1.3227	Cytotoxic			18.1225	2.67141	2.32072	0.441848	71.47	20.5465	2.48315	1.56323	0.139877	2.08	27.8164	3.33642	20.8943	2.7111	81.44
43	a	2018-05-11	35.5366	3.85169	7.23589	0.420331	29.22	21.0881	1.77039	1.79791	0.164566	92.25	29.9312	3.82986	2.30681	0.0924318	1.41	29.2398	5.95824	7.44602	0.398415	228.54
	b	2018-05-24	70.9723	35.9445	10.2934	0.35399	20.54	28.7687	1.65114	4.12712	0.624092	40.19	27.2702	1.73349	0.2442	0.0500625	13.29	33.5233	9.69737	10.9987	1.44028	154.72
44	a	2018-05-11	25.0438	2.41281	1.43062	0.0672737	147.79	17.1585	1.88868	1.9857	0.144196	83.52	17.5009	1.33385	3.11333	0.0720562	1.04	29.146	4.16335	4.59982	0.227156	369.95
	b	2018-05-15	12.9416	1.53903	2.15239	0.103635	98.23	7.27802	0.394359	2.24517	0.288636	73.87	N/A					4.47828	0.403908	2.57599	0.311614	660.6
	c	2018-05-24	15.5909	3.13811	2.3245	0.0594363	90.96	9.99001	0.515369	0.97371	0.157955	170.33	11.812	1.97284	1.08968	0.609851	2.98	12.9601	1.74178	2.48756	0.112349	684.08
	d	2018-05-27	7.82473	0.78186	2.21484	0.129506	95.46	11.9432	1.06951	1.30141	0.233386	127.44	11.4482	0.711531	6.42674	0.712475	0.5	14.828	1.61428	5.07717	0.312013	335.17
	e	2018-06-07	10.1874	1.35646	2.85714	0.0986939	74	11.3045	0.437307	1.97707	0.250827	83.89	12.1403	0.823014	Cytotoxic			29.6824	4.17791	3.32889	0.0997117	511.19
	Blank 1		>100		>100			>100		96.9932	19.9725		>100		>100			>100		>100
	Blank 2		>100		>100			>100		>100			>100		>100			>100		>100
	Blank 3		>100		86.2813	4.86644		>100		71.3776	8.45221		>100		>100			>100		>100
	Blank 4		39.3082	6.62553	Cytotoxic			53.2481	6.975	Cytotoxic			>100		>100			>100		>100
	Blank 5		>100		>100			>100		>100			>100		>100			>100		>100
	Blank 6		>100		>100			>100		>100			>100		>100			>100		>100
	Blank 7		>100		>100			>100		>100			>100		>100			>100		>100
	Blank 8		>100		>100			>100		>100			>100		>100			>100		>100
	Blank 9		>100		>100			>100		>100			>100		50.1002	14.3674		>100		>100
	Blank 10		>100		>100			>100		>100			>100		>100			>100		>100
	Blank 11		9.35454	2.4327	Cytotoxic			33.67	3.05184	Cytotoxic			86.5801	13.433	Cytotoxic			>100		68.7663	4.93498
	Blank 12		12.07	1.34394	1.0203	0.124506		32.1027	2.44043	Cytotoxic			>100		>100			>100		93.1272	7.63716
	Blank 13		>100		>100			>100		>100			>100		>100			>100		>100
	Blank 14		>100		>100			>100		>100			>100		51.1509	39.9788		>100		>100
	Blank 15		>100		>100			>100		>100			>100		>100			>100		>100
	Blank 16		>100		>100			>100		>100			>100		>100			>100		>100
	Blank 17		>100		>100			>100		>100			>100		>100			>100		>100
N/A: Not available
*EC10 could not be derived as effect did not drop below 30%

## Sheet: Table S7
Table S7: Benzo[a]pyrene equivalent concentrations (B[a]P-EQ) for, both, bioanalysis (BaP-BEQbio,iceberg) and chemical analysis (BaP-BEQchem) and toxic units for cytotoxicity (TUcytotoxicity) for both bioanalysis (TUcytotoxicity(bio, iceberg)) and chemical analysis (TUcytotoxicity(chem)) in the AhR CALUX assay.
Site ID	Sample ID	BaP-BEQbio,iceberg (M)	SE	BaP-BEQchem (M)	% BaP-BEQbio,iceberg explained	BaP-BEQchem,tip (M)	SE	BaP-BEQchem,tip /BaP-BEQchem	number of chemicals in tip mixture (of 17)	BaP-BEQbio,tip (M)	SE	IPQ	TUcytotoxicity(bio, iceberg)	TUcytotoxicity(chem)	% TUcytotoxicity(bio, iceberg) explained	TUcytotoxicity(bio,tip)	TUcytotoxicity(chem,tip)
1	a	1.74099e-11	1.2648e-12	2.35389e-16	1.35204e-05								<1.00E-02	7.8259e-08	-
2	a	9.18692e-10	8.59367e-11	2.5543e-13	0.000278037	2.30077e-13	1.63463e-14	0.900742	11	4.16077e-13	3.43525e-14	0.808428	0.06463	0.0005628	0.00870802		5.6982e-05
	b	3.21878e-10	2.67783e-11	5.80339e-14	0.000180298								0.04302	2.13334e-05	0.000495895		2.02764e-05
	c	6.51635e-10	6.32101e-11	3.82422e-14	5.86865e-05								0.03686	1.49776e-05	0.000406337		1.3401e-05
3	a	1.13998e-10	9.27772e-12	9.07324e-14	0.00079591	8.63469e-14	6.43814e-15	0.951666	13	1.19682e-13	9.87107e-15	0.386062	0.06025	0.000617809	0.0102541	1.3491e-07	4.50554e-05
	b	3.28416e-10	2.80273e-11	7.95939e-14	0.000242357	7.4046e-14	5.44081e-15	0.930298	10	1.01248e-13	8.12456e-15	0.367369	0.03387	0.000344111	0.0101598	6.74916e-06	2.57198e-05
	c	3.64124e-10	3.03302e-11	1.86847e-13	0.000513142	1.84669e-13	1.37691e-14	0.988341	12	2.23872e-13	1.70319e-14	0.212288	0.03402	0.000730018	0.0214585	5.75599e-05	6.12033e-05
	d	7.13244e-10	1.05951e-10	2.28785e-13	0.000320767	2.27307e-13	1.66951e-14	0.993538	13	2.47332e-13	2.05056e-14	0.088097	0.01112	0.000527676	0.0474529	0.000109476	9.65115e-05
4	a	2.60855e-10	2.81886e-11	1.59642e-13	0.000611996	8.71037e-14	6.58946e-15	0.545618	14	9.34351e-14	7.70449e-15	0.0726886	0.0344	0.000869391	0.025273	7.14883e-05	5.52442e-05
	b	2.9078e-10	3.87378e-11	4.65947e-14	0.000160241	3.97428e-14	3.18672e-15	0.852946	10	5.51951e-14	4.34968e-15	0.388809	0.08315	0.000513193	0.0061719	4.23032e-05	2.68052e-05
5	a	3.19531e-10	2.8883e-11	5.39307e-14	0.000168781	3.06115e-14	2.35668e-15	0.567608	9	3.31049e-14	3.08312e-15	0.0814525	0.05669	0.000369921	0.00652533	3.49507e-05	2.33653e-05
	b	3.68734e-10	4.14965e-11	2.46903e-14	6.69595e-05	2.07723e-14	1.63671e-15	0.841313	8	2.00006e-14	2.22765e-15	-0.0385828	0.08265	6.2574e-05	0.000757097	1.82832e-05	8.70304e-06
	c	1.70662e-10	1.4145e-11	2.58624e-14	0.000151542	2.43297e-14	2.06321e-15	0.940736	8				0.07028	0.000142624	0.00202937	5.34109e-05	2.03927e-05
	d	5.3948e-10	7.28423e-11	2.03831e-14	3.77829e-05	1.98812e-14	1.53901e-15	0.975377	7	1.96356e-14	1.49444e-15	-0.0125076	0.02782	7.93846e-05	0.00285351	9.93545e-06	7.56013e-06
6	a	3.49539e-10	5.4484e-11	2.95409e-14	8.45139e-05	2.51238e-14	1.93465e-15	0.850477	7				0.1133	0.000161915	0.00142909	5.01857e-05	1.09631e-05
	b	3.16932e-10	3.0081e-11	1.08919e-12	0.00343666	1.08283e-12	8.04349e-14	0.994163	9	1.47583e-12	1.14761e-13	0.362939	0.1538	0.000596544	0.0038787	0.00078914	0.00040955
	c	6.14417e-10	6.75693e-11	6.79509e-13	0.00110594	6.77131e-13	4.91881e-14	0.996501	10	7.94325e-13	6.71651e-14	0.173074	0.06953	0.000373086	0.00536583	0.000512955	0.000185399
7	a	1.48617e-10	1.33058e-11	5.66239e-14	0.000381006	5.03279e-14	3.88246e-15	0.88881	11	6.4594e-14	5.34853e-15	0.283461	0.05112	0.000663166	0.0129727	3.51724e-05	2.6767e-05
8	a	1.64292e-10	1.19083e-11	7.80915e-14	0.000475322	7.7419e-14	6.09143e-15	0.991388	8	9.10856e-14	9.26546e-15	0.176528	0.04385	0.000453155	0.0103342	9.77135e-05	5.29284e-05
	b	1.44007e-10	1.29245e-11	9.65158e-13	0.00670217	8.43481e-13	7.04157e-14	0.873931	13	1.1159e-12	9.02644e-14	0.322972	0.0203	0.0248117	1.22225	0.000729411	0.000390057
	c	1.00503e-09	9.11328e-11	2.50733e-12	0.00249478	2.50346e-12	1.87774e-13	0.998458	9	1.68352e-12	1.62859e-13	-0.487038	0.06294	0.00360173	0.0572248	0.00241889	0.00180473
9	a	8.08298e-11	9.77935e-12	9.78246e-15	0.000121025	9.44225e-15	6.77818e-16	0.965222	8	9.76191e-15	8.00365e-16	0.0338538	<1.00E-02	0.00046315	-	1.76683e-05	1.43373e-05
	b	2.17603e-10	1.86263e-11	2.14229e-13	0.000984496	1.96235e-13	1.60832e-14	0.916005	10	2.88802e-13	2.05533e-14	0.471716	0.03591	0.00200041	0.0557061	7.13493e-05	0.000123808
10	a	9.32942e-11	6.57909e-12	5.03661e-14	0.000539863	3.77164e-14	2.86275e-15	0.748846	12	7.23619e-14	5.6838e-15	0.918577	0.01583	0.000259742	0.0164082	1.88366e-05	2.00907e-05
	b	1.40486e-10	1.07637e-11	4.50407e-14	0.000320606	4.03896e-14	3.00752e-15	0.896735	12	5.35965e-14	4.35383e-15	0.326988	0.01443	7.6152e-05	0.00527734	1.57566e-05	1.36887e-05
	c	6.56664e-10	9.26858e-11	1.0343e-13	0.000157508	2.70011e-14	2.35305e-15	0.261057	12				0.02926	0.000109852	0.00375434	6.29277e-05	3.08364e-05
11	a	1.0964e-10	7.92006e-12	2.40784e-14	0.000219614								0.01168	0.0009628	0.0824315		2.6931e-05
	b	1.74853e-10	1.97306e-11	1.13441e-12	0.00648777	1.1273e-12	8.66582e-14	0.993734	12	1.56294e-12	1.18975e-13	0.386444	0.02028	0.00629029	0.310172	0.000830009	0.000684932
	c	1.80469e-10	2.00687e-11	6.81702e-14	0.000377738								0.02639	0.00060968	0.0231027		4.266e-05
	d	2.46018e-10	1.85778e-11	2.86768e-13	0.00116564	2.80231e-13	2.22731e-14	0.977203	10	3.15531e-13	2.2878e-14	0.125967	0.01953	0.00100224	0.0513179	0.000200305	0.000170129
12	a	8.6337e-11	1.02703e-11	2.78487e-14	0.000322558								<1.00E-02	0.000484306	-		2.22208e-05
	b	1.80218e-10	1.30952e-11	9.52679e-14	0.000528626	8.43911e-14	6.33066e-15	0.88583	11	7.33849e-14	6.62783e-15	-0.14998	0.024	0.000666575	0.027774	0.000117006	4.17677e-05
	c	3.64124e-10	2.79789e-11	4.19688e-14	0.00011526	3.75748e-14	2.93385e-15	0.895303	11	3.9174e-14	3.21777e-15	0.0425607	0.03003	0.000389674	0.0129762	6.06958e-05	2.42078e-05
	d	2.29254e-10	2.36424e-11	1.02739e-13	0.000448145	1.00891e-13	7.4775e-15	0.982008	10	1.19237e-13	1.18221e-14	0.181839	<1.00E-02	0.000574442	-	0.000133907	4.52973e-05
13	a	3.4451e-10	3.14757e-11	2.58408e-13	0.000750076	1.94152e-13	1.75823e-14	0.751337	11	2.63677e-13	2.1736e-14	0.358099	0.02691	0.00206332	0.0766749	0.000121572	9.40762e-05
14	a	4.85499e-11	4.92186e-12	4.35715e-14	0.000897458	2.96568e-14	2.15791e-15	0.680647	6	4.29536e-14	3.8021e-15	0.448357	0.01261	0.000263083	0.020863	2.77999e-05	1.36849e-05
	b	1.15591e-10	9.12884e-12	1.20531e-13	0.00104274	1.14051e-13	8.39694e-15	0.946239	11	1.2923e-13	1.13046e-14	0.133088	0.01512	0.000207789	0.0137426	5.60242e-05	5.89551e-05
15	a	9.37133e-12	8.76039e-13	2.84833e-14	0.00303941								<1.00E-02	0.00025379	-		1.60287e-05
	b	2.65633e-10	1.94544e-11	4.71073e-13	0.0017734	4.5879e-13	3.57169e-14	0.973927	13	1.2178e-13	1.61989e-14	-2.76738	0.02114	0.00189926	0.0898422	0.000147466	0.000251243
	c	1.74937e-10	1.32705e-11	9.68179e-14	0.000553444	9.27784e-14	7.38393e-15	0.958278	11	1.02354e-13	8.31795e-15	0.103212	0.03271	0.00184521	0.0564111	0.000129981	4.01927e-05
	d	1.91115e-10	1.44004e-11	1.41022e-13	0.000737893	1.3486e-13	1.02904e-14	0.956303	10				0.02842	0.000667925	0.0235019	0.00015647	7.74881e-05
16	a	3.30847e-11	3.05419e-12	5.44855e-15	0.000164685								<1.00E-02	0.00029875	-		1.19064e-05
17	a	3.07209e-10	2.67175e-11	7.2977e-14	0.000237549	6.3768e-14	4.75426e-15	0.873809	10	1.08909e-13	1.08111e-14	0.707888	0.03904	0.000769495	0.0197104	0.000154116	4.78906e-05
	b	1.11316e-09	1.59977e-10	2.06259e-13	0.000185291	2.04327e-13	1.49692e-14	0.990635	10	2.27681e-13	1.83311e-14	0.114295	0.09139	0.000868675	0.00950514	0.000217191	0.000120097
	c	7.62951e-10	1.45591e-10	1.10802e-13	0.000145228	1.0899e-13	8.15386e-15	0.983642	9	2.1916e-13	1.55376e-14	1.01084	0.02269	7.90695e-05	0.00348477	3.00493e-05	1.4277e-05
18	a	2.86002e-10	2.87155e-11	5.54871e-13	0.0019401	4.67107e-13	3.738e-14	0.84183	12	5.63456e-13	1.26566e-13	0.20627	0.04918	0.00241262	0.0490569	0.000789016	0.000137314
	b	1.04946e-10	8.93741e-12	1.59526e-13	0.00152008	1.54123e-13	1.32916e-14	0.966133	12	1.90535e-13	1.84999e-14	0.236249	<1.00E-02	0.00120762	-	0.000179468	5.35301e-05
	c	4.99665e-11	4.92659e-12	6.59227e-14	0.00131934	6.05303e-14	4.86416e-15	0.918202	10	8.28074e-14	6.67081e-15	0.368031	0.01857	0.000506518	0.0272761	2.88343e-05	2.18166e-05
19	a	1.9824e-09	2.37736e-10	8.01319e-15	4.04217e-06	7.4378e-15	5.3252e-16	0.928194	4				0.03468	0.000566715	0.0163413	5.93276e-06	2.66741e-06
20	a	1.05197e-10	1.18833e-11	6.86491e-14	0.000652577								0.0169	0.00124404	0.073612		7.73985e-05
	b	1.60017e-10	1.22914e-11	5.99338e-14	0.000374547	5.90591e-14	4.19891e-15	0.985406	7				0.07693	0.00111568	0.0145025	0.000144353	2.25789e-05
	c	8.39899e-11	6.65233e-12	1.84273e-14	0.000219399								0.03209	0.000121497	0.00378613		6.23962e-06
21	a	1.85499e-10	1.3188e-11	5.96067e-14	0.000321332	5.90328e-14	5.11896e-15	0.990373	8	8.53038e-14	8.32097e-15	0.445024	0.02997	0.000616173	0.0205596	7.50519e-05	4.36469e-05
	b	2.59179e-10	1.92262e-11	1.02751e-13	0.000396448	1.0054e-13	7.36047e-15	0.978488	13	9.81814e-14	8.55077e-15	-0.0240261	0.03103	0.000722398	0.0232806	8.25213e-05	5.85293e-05
	c	2.49036e-10	2.15439e-11	2.75564e-13	0.00110652	2.29791e-13	1.66178e-14	0.833893	12	2.48169e-13	2.54587e-14	0.0799791	0.03829	0.00075269	0.0196576	0.000202054	7.54101e-05
	d	3.60268e-10	2.72117e-11	1.69727e-13	0.000471113	1.6811e-13	1.23172e-14	0.990472	9	2.07583e-13	2.12449e-14	0.234806	0.03668	0.000222965	0.00607865	0.000172101	8.7771e-05
	e	1.44761e-09	2.63874e-10	1.63725e-13	0.0001131	1.4931e-13	1.07264e-14	0.91196	9				0.03932	0.000274387	0.00697831	0.000136709	4.12313e-05
	f	1.44929e-09	1.61888e-10	4.21881e-13	0.000291095	3.91391e-13	2.86534e-14	0.927728	12	4.03239e-13	3.13112e-14	0.0302713	0.08059	0.00071159	0.00882975	0.000119655	0.000143102
22	a	6.58676e-11	4.83992e-12	3.94666e-14	0.000599181	3.91765e-14	2.91587e-15	0.99265	7	3.9999e-14	4.42504e-15	0.020995	0.01562	0.00103948	0.0665478	0.000182996	4.7068e-05
	b	9.29589e-11	6.64981e-12	4.79213e-14	0.000515511	4.75487e-14	3.53672e-15	0.992224	12				0.02622	0.000314354	0.0119891	8.85502e-05	2.59154e-05
	c	8.1492e-11	7.93169e-12	4.41072e-14	0.000541246	4.26025e-14	3.17332e-15	0.965885	11	9.20939e-14	1.03827e-14	1.1617	0.01986	0.000522097	0.0262889	1.03876e-05	2.64375e-05
	d	1.39983e-10	1.27386e-11	2.55063e-13	0.0018221	2.54979e-13	1.88381e-14	0.99967	8	3.92462e-13	3.28587e-14	0.539192	0.04699	0.000764187	0.0162628	4.64819e-05	9.17703e-05
	e	2.25314e-10	1.77504e-11	8.85507e-14	0.00039301	8.73911e-14	6.30626e-15	0.986904	10	1.00491e-13	8.48003e-15	0.149896	0.029	0.000324763	0.0111987	1.76983e-05	1.95076e-05
23	a	7.78039e-11	5.82239e-12	8.60502e-13	0.0110599	8.59677e-13	5.95553e-14	0.999041	7	1.5641e-12	1.99479e-13	0.819405	0.01246	0.000876031	0.0703075	0.00264862	7.34454e-05
	b	2.3135e-10	1.78002e-11	8.35528e-13	0.00361154	7.59942e-13	5.98345e-14	0.909535	14	1.15622e-12	1.04044e-13	0.521458	0.0459	0.00747738	0.162906	0.000893081	0.000326701
	c	4.02515e-10	4.67432e-11	1.9947e-13	0.00049556	1.92382e-13	1.37992e-14	0.964464	10	3.71522e-13	4.344e-14	0.931171	0.03204	0.00141252	0.0440862	0.000524759	4.3016e-05
	d	5.15759e-10	5.89538e-11	7.38559e-14	0.000143199								0.03668	0.000342937	0.00934944		2.52953e-05
	e	2.91199e-10	2.72986e-11	1.58271e-13	0.000543514	1.48606e-13	1.3307e-14	0.938936	8	3.29361e-13	2.685e-14	1.21634	0.03381	0.00414337	0.122549	0.000255987	7.50068e-05
	f	2.75943e-10	2.35364e-11	1.57858e-13	0.000572068	1.56153e-13	1.09758e-14	0.989197	9	2.3698e-13	2.49844e-14	0.517617	0.03477	0.0019672	0.0565774	5.97631e-05	1.18567e-05
24	a	1.76781e-10	2.35567e-11	1.66095e-13	0.000939551	1.61203e-13	1.32402e-14	0.97055	11	1.74414e-13	2.48069e-14	0.0819514	0.04597	0.00361333	0.0786019	0.000432977	0.000151979
	b	1.81811e-10	1.29127e-11	1.68448e-13	0.0009265	1.53072e-13	1.11516e-14	0.908723	14	1.71399e-13	1.47871e-14	0.119729	0.0202	0.00110758	0.0548306	0.000156537	7.20241e-05
	c	1.66723e-09	2.99644e-10	1.29722e-13	7.78072e-05	1.24184e-13	8.7675e-15	0.957306	9	1.37941e-13	1.37508e-14	0.110784	0.0115	0.000583305	0.0507221	7.87163e-05	2.35315e-05
	d	5.01676e-10	4.5969e-11	1.82141e-13	0.000363065	1.80821e-13	1.27454e-14	0.992752	9	1.92959e-13	2.47999e-14	0.0671299	0.09786	0.00125593	0.012834	0.000304805	5.20885e-05
25	a	8.92707e-11	8.65657e-12	7.30585e-14	0.000818392	7.26954e-14	5.86735e-15	0.99503	6	6.8408e-14	6.69198e-15	-0.0626734	<1.00E-02	0.00107313	-	0.000136975	6.54698e-05
	b	2.75189e-10	3.15257e-11	5.93211e-14	0.000215565								0.02177	0.000146715	0.00673931		2.02763e-05
	c	1.11148e-10	8.54831e-12	4.36214e-14	0.000392461								0.01204	0.00063392	0.0526512		1.00123e-05
26	a	1.65801e-10	1.22635e-11	5.47023e-14	0.000329928	5.00769e-14	3.61817e-15	0.915444	7	5.62173e-14	5.49766e-15	0.122619	0.02123	0.000368489	0.017357	1.14298e-05	2.50734e-05
	b	1.8793e-10	1.35682e-11	9.96878e-14	0.000530453	9.784e-14	7.11702e-15	0.981464	11	1.15125e-13	8.87965e-15	0.176663	0.01872	0.000946634	0.0505681	7.77272e-05	4.38832e-05
	c	1.6974e-10	1.64669e-11	4.72844e-12	0.027857	4.72801e-12	3.25814e-13	0.999909	9	9.29585e-12	7.74646e-13	0.966122	0.02103	0.00130319	0.0619681	0.00509827	0.000222023
	d	2.42163e-10	1.942e-11	1.02244e-12	0.00422214	6.43502e-13	4.44836e-14	0.629376	10	7.67549e-13	1.02042e-13	0.192768	<1.00E-02	0.000831074	-	0.000235088	3.80243e-05
27	a	2.89355e-10	3.05413e-11	2.19777e-13	0.000759541	2.16814e-13	1.57639e-14	0.986518	9	3.05381e-13	3.1182e-14	0.408497	0.02216	0.00152653	0.0688866	0.000185619	8.28814e-05
	b	4.06706e-10	3.59906e-11	1.77864e-13	0.000437329	1.7461e-13	1.22943e-14	0.981704	11	2.42773e-13	2.2141e-14	0.390373	0.1185	0.000639675	0.0053981	0.000207341	4.04115e-05
	c	1.94719e-10	1.8372e-11	4.01189e-14	0.000206035	4.01142e-14	3.01149e-15	0.999882	3	2.59753e-14	2.82649e-15	-0.544318	<1.00E-02	7.81384e-05	-	2.19339e-05	2.63454e-05
	d	9.31266e-11	6.99958e-12	5.38867e-13	0.0057864	5.38825e-13	4.0223e-14	0.999922	4	7.70252e-13	7.86447e-14	0.429503	0.01681	0.000490067	0.0291533	0.000713544	0.00022454
	e	2.94803e-10	2.81815e-11	8.09441e-14	0.00027457	7.72498e-14	5.45731e-15	0.95436	9	9.32735e-14	8.72424e-15	0.207427	0.08026	0.000323369	0.00402902	1.00384e-05	1.44265e-05
	f	1.99162e-10	1.61742e-11	9.44984e-14	0.000474481	9.26028e-14	6.56072e-15	0.97994	11	1.22745e-13	9.9249e-15	0.325495	<1.00E-02	0.000210511	-	4.58721e-05	1.61009e-05
28	a	8.54987e-11	1.65143e-11	6.02462e-15	7.04644e-05								0.01613	0.00040419	0.0250582		1.77631e-05
29	a	9.3881e-11	7.09547e-12	7.03899e-14	0.000749778	6.44045e-14	5.36167e-15	0.914968	10	8.49263e-14	6.77391e-15	0.318639	0.03181	0.00446662	0.140416	9.14768e-05	5.36753e-05
30	a	1.80302e-09	2.9631e-10	2.40481e-13	0.000133377	2.06439e-13	1.66926e-14	0.858441	9	3.65653e-13	3.11586e-14	0.771238	1.236	0.00226419	0.00183187	0.000107226	0.000121847
31	a	1.47611e-10	1.79433e-11	4.51544e-14	0.000305901	4.22534e-14	3.27099e-15	0.935752	7				0.01491	0.00017636	0.0118283	5.30441e-05	2.27659e-05
	b	8.07963e-10	8.64659e-11	1.67294e-13	0.000207056								0.1778	0.000458384	0.00257809		6.57281e-05
	c	4.70075e-10	5.00806e-11	2.53864e-13	0.000540049	2.51416e-13	1.93438e-14	0.990358	11				0.134	0.00289654	0.021616	0.000330507	0.000183112
	d	5.72171e-10	4.29873e-11	2.25805e-13	0.000394645	2.20541e-13	1.62721e-14	0.97669	13	3.08929e-13	2.37457e-14	0.400777	0.2012	0.000370847	0.00184318	0.000108156	8.05818e-05
32	a	2.05784e-10	2.19661e-11	6.5513e-14	0.000318358	6.1517e-14	4.83775e-15	0.939005	10	6.01367e-14	5.65468e-15	-0.0229531	0.05007	0.000334169	0.00667404	5.94985e-05	3.2851e-05
	b	1.3487e-10	1.14735e-11	4.36708e-14	0.000323799								<1.00E-02	5.22143e-05	-		1.52498e-05
	c	9.37133e-11	7.17632e-12	6.90256e-14	0.000736562	6.77313e-14	5.45783e-15	0.981248	9	5.80074e-14	8.44492e-15	-0.167631	0.03382	0.00126785	0.037488	0.000126457	4.50176e-05
33	a	1.15339e-10	8.79305e-12	2.218e-14	0.000192302								0.01104	0.000177742	0.0160998		1.16421e-05
	b	Cytotoxic		4.09582e-14		3.85523e-14	3.25335e-15	0.94126	9	6.19094e-14	4.98672e-15	0.605855	0.1572	0.000213549	0.00135845	2.13037e-05	1.45146e-05
	c	1.46689e-10	1.19508e-11	3.19682e-14	0.000217932	2.86852e-14	2.48601e-15	0.897305	7	4.53783e-14	3.93859e-15	0.581939	0.02011	0.000298772	0.0148569	2.70192e-05	8.38688e-06
34	a	2.41492e-10	1.96334e-11	1.68682e-14	6.985e-05	1.57632e-14	1.26662e-15	0.93449	9				0.03493	0.000260384	0.00745444	3.21181e-05	1.93311e-05
35	a	1.15172e-10	8.47548e-12	2.00723e-14	0.000174282	1.50523e-14	1.14716e-15	0.749903	10	2.75369e-14	2.36776e-15	0.829413	0.02136	6.10205e-05	0.00285677	2.19368e-05	9.54463e-06
36	a	9.43001e-11	7.03276e-12	2.55995e-13	0.00271469	2.5463e-13	1.85802e-14	0.994667	12	3.06351e-13	2.26452e-14	0.20312	0.01747	0.000438528	0.0251018	0.000138917	5.21758e-05
	b	9.54736e-11	8.14332e-12	1.11581e-13	0.00116871	1.11466e-13	8.41332e-15	0.998977	8	1.60205e-13	1.40605e-14	0.437251	0.03843	0.000113706	0.00295879	7.25725e-05	1.30432e-05
	c	1.39145e-10	1.67688e-11	2.24241e-13	0.00161156	2.19309e-13	1.55209e-14	0.978008	10	2.22183e-13	3.588e-14	0.013101	0.02082	0.00108476	0.052102	0.000360649	7.97518e-05
	d	1.47695e-10	1.83859e-11	4.97914e-14	0.000337124	4.94173e-14	3.71158e-15	0.992485	8	5.7358e-14	5.38976e-15	0.160688	0.02303	6.30649e-05	0.00273838	2.02011e-05	9.0242e-06
37	a	1.06957e-10	8.87546e-12	3.67032e-13	0.00343158	3.64486e-13	2.76915e-14	0.993062	9	2.931e-13	2.34366e-14	-0.243555	<1.00E-02	0.000107762	-	6.65964e-05	1.17976e-05
	b	2.39564e-10	1.86033e-11	1.34151e-12	0.00559978	1.33346e-12	1.01448e-13	0.994	10	1.10063e-12	7.84941e-14	-0.211539	0.03608	0.000214292	0.00593936	0.000326342	4.00858e-05
	c	2.00503e-10	1.94004e-11	1.66331e-12	0.0082957	1.65058e-12	1.25451e-13	0.992348	9	1.61375e-12	1.32696e-13	-0.0228228	0.03781	0.000264646	0.00699936	0.000125163	4.86949e-05
	d	2.72255e-10	2.71557e-11	1.01088e-12	0.00371299	1.00284e-12	7.6267e-14	0.99205	9	7.973e-13	5.82151e-14	-0.2578	0.02529	0.000158218	0.00625617	7.30282e-05	4.51379e-05
38	a	7.88516e-11	6.12906e-12	2.20367e-15	2.7947e-05	2.19125e-15	2.1952e-16	0.994365	3	3.90558e-15	4.14262e-16	0.782353	0.02536	2.53207e-05	0.000998449	1.63752e-06	8.38949e-07
	b	3.65884e-11	4.25566e-12	1.58061e-14	0.000431998	1.26459e-14	9.60518e-16	0.800066	7	1.65398e-14	1.71885e-15	0.307912	0.02106	1.50597e-05	0.000715085	8.02908e-06	5.62247e-06
	c	Cytotoxic		1.43668e-14		1.13012e-14	8.54979e-16	0.786619	7	1.31146e-14	1.57793e-15	0.160461	0.08022	1.82576e-05	0.000227595	6.14446e-06	4.65791e-06
	d	5.02515e-10	4.60435e-11	7.60628e-14	0.000151364	6.62927e-14	5.14957e-15	0.871553	11	7.70361e-14	7.13734e-15	0.162059	0.05353	0.00100658	0.018804	0.000110178	5.23712e-05
	e	2.55574e-10	3.09403e-11	5.81691e-15	2.27602e-05	5.71538e-15	4.40703e-16	0.982545	7	7.46047e-15	5.48311e-16	0.305334	0.04929	4.44913e-05	0.000902644	4.10022e-06	2.37597e-06
39	a	1.93378e-11	1.66059e-12	1.19051e-15	6.15637e-05								<1.00E-02	1.96909e-06	-		4.49391e-07
40	a	1.45599e-10	1.17809e-11	1.44841e-14	9.94794e-05	1.43176e-14	1.06333e-15	0.988501	7	1.34775e-14	1.23329e-15	-0.0623336	0.0276	6.75424e-05	0.00244719	7.37196e-06	3.89551e-06
	b	2.40738e-10	2.27971e-11	2.40715e-13	0.000999908	2.38446e-13	1.91074e-14	0.990573	12	2.87951e-13	3.90407e-14	0.207613	0.03339	0.00128588	0.038511	0.000167864	0.000161878
41	a	8.04946e-11	5.61167e-12	2.70422e-14	0.000335951	2.59249e-14	2.04268e-15	0.958681	7	3.07386e-14	2.85279e-15	0.18568	<1.00E-02	0.000404482	-	3.48318e-05	2.31053e-05
	b	6.15088e-11	5.07159e-12	1.67469e-14	0.000272268	1.60052e-14	1.41831e-15	0.955715	7	1.84917e-14	3.686e-15	0.155352	0.01899	3.94823e-05	0.00207911	2.14985e-05	8.95926e-06
42	a	Cytotoxic		2.46596e-14		2.2711e-14	1.73511e-15	0.920981	7	3.68646e-14	4.36421e-15	0.623204	0.09762	0.000274249	0.00280936	2.20713e-05	9.07702e-06
	b	Cytotoxic		2.16117e-14									0.06549	0.000361479	0.00551961		1.42659e-05
43	a	1.15842e-10	1.01518e-11	1.90286e-14	0.000164263	1.80356e-14	1.43599e-15	0.947816	9	2.00587e-14	2.06361e-15	0.11217	0.02814	0.000489522	0.0173959	2.92587e-05	2.34954e-05
	b	8.14334e-11	6.03267e-12	1.03635e-14	0.000127264	9.21345e-15	7.51458e-16	0.889025	8	1.04178e-14	8.72041e-16	0.130713	0.01409	0.000195455	0.0138719	1.56184e-05	1.13102e-05
44	a	5.85918e-10	4.72985e-11	1.31362e-13	0.000224199								0.03993	0.00118086	0.0295734		0.000109127
	b	3.89438e-10	3.16948e-11	2.16933e-13	0.000557041	1.90371e-13	1.51147e-14	0.877557	13	2.1367e-13	2.34872e-14	0.122387	0.07727	0.00135798	0.0175744	0.000206355	0.000107695
	c	3.60604e-10	2.53941e-11	7.51767e-13	0.00208475	7.48878e-13	5.78582e-14	0.996157	10	1.0326e-12	8.61151e-14	0.378858	0.06414	0.00682525	0.106412	0.000582722	0.000475707
	d	3.78458e-10	3.32618e-11	5.7418e-13	0.00151716	5.04154e-13	4.74332e-14	0.878042	11	5.26418e-13	5.47009e-14	0.0441616	0.1278	0.026335	0.206064	0.000496918	0.000183177
	e	2.93378e-10	2.17546e-11	1.55939e-13	0.000531529								0.09816	7.22213e-05	0.000735751		5.40197e-05

## Sheet: Table S8
Table S8: Rosiglitazone equivalent concentrations (Rosiglitazone-EQ) for, both, bioanalysis (Rosiglitazone-BEQbio,iceberg) and chemical analysis (Rosiglitazone-BEQchem) and toxic units for cytotoxicity (TUcytotoxicity) for both bioanalysis (TUcytotoxicity(bio, iceberg)) and chemical analysis (TUcytotoxicity(chem)) in the PPARγ GeneBLAzer assay.
Site ID	Sample ID	Rosiglitazone-BEQbio,iceberg (M)	SE	Rosiglitazone-BEQchem (M)	% Rosiglitazone-BEQbio,iceberg explained	Rosiglitazone-BEQchem,tip (M)	SE	Rosiglitazone-BEQchem,tip /Rosiglitazone-BEQchem	number of chemicals in tip mixture (of 17)	Rosiglitazone-BEQbio,tip (M)	SE	IPQ	TUcytotoxicity(bio, iceberg)	TUcytotoxicity(chem)	% TUcytotoxicity(bio, iceberg) explained	TUcytotoxicity(bio,tip)	TUcytotoxicity(chem,tip)
1	a	1.11699e-11	1.15975e-12	-	-								<1.00E-02	-	-
2	a	3.05351e-10	3.61079e-11	3.54784e-13	0.00116189	3.54784e-13	2.40446e-14	1					0.08614	0.000149445	0.00173491		3.03295e-05
	b	1.78152e-10	2.47702e-11	5.04617e-14	0.00028325	5.04617e-14	2.94033e-15	1					0.0395	7.44882e-05	0.00188578		1.02052e-05
	c	3.57187e-10	6.0817e-11	3.28267e-14	9.19035e-05	3.28267e-14	1.91276e-15	1					0.05682	2.2205e-05	0.000390795		6.63873e-06
3	a	2.25626e-10	2.15579e-11	1.48047e-13	0.000656161	1.48047e-13	1.0667e-14	1	3	2.25212e-13	2.08738e-14	0.52122	0.06803	0.000133887	0.00196806	no cytotoxicty	1.9979e-05
	b	4.79373e-10	8.34265e-11	2.03666e-13	0.00042486	2.03666e-13	1.46701e-14	1	4	1.04941e-13	1.16287e-14	-0.940766	0.03719	0.00011611	0.00312208	no cytotoxicty	2.02904e-05
	c	4.12038e-10	5.14105e-11	2.40442e-13	0.000583542	2.40442e-13	1.67656e-14	1	4	2.92564e-13	2.66351e-14	0.216776	0.03306	0.000382305	0.011564	no cytotoxicty	2.16758e-05
	d	4.4559e-10	4.90469e-11	2.18887e-13	0.00049123	2.18887e-13	1.8673e-14	1					0.04512	0.000407241	0.00902574		3.66183e-05
4	a	1.62096e-10	2.05388e-11	5.34055e-14	0.000329468	5.34055e-14	6.63916e-15	1					0.04265	0.000239458	0.00561448		1.91518e-05
	b	2.0711e-10	1.77658e-11	2.32465e-14	0.000112243	2.32465e-14	2.655e-15	1	2	9.64725e-14	7.0641e-15	3.14998	0.115	0.000116379	0.00101199	5.93386e-06	1.27695e-05
5	a	1.05202e-10	1.15232e-11	3.38618e-14	0.000321874	3.38618e-14	3.37275e-15	1	4	2.16901e-13	2.05037e-14	5.40547	0.03765	0.000112424	0.00298603	5.03942e-06	7.35993e-06
	b	2.75141e-10	3.57329e-11	1.49248e-14	5.42444e-05	1.49248e-14	1.48483e-15	1					0.09154	3.81348e-05	0.000416592		4.81265e-06
	c	1.59265e-10	2.15521e-11	4.07528e-14	0.00025588	4.07528e-14	4.51753e-15	1	4	1.99559e-13	1.30404e-14	3.8968	0.08037	0.000115639	0.00143884	no cytotoxicty	1.08586e-05
	d	2.17783e-10	2.28492e-11	3.20464e-14	0.000147148	3.20464e-14	2.34617e-15	1	4	6.86976e-14	3.85235e-15	1.14369	0.03671	5.35334e-05	0.00145828	no cytotoxicty	3.3231e-06
6	a	3.05862e-10	4.01209e-11	1.09681e-14	3.58597e-05	1.09681e-14	1.08089e-15	1					0.1604	5.16895e-05	0.000322253		4.2587e-06
	b	7.9447e-10	9.49942e-11	4.49361e-14	5.65611e-05	4.49361e-14	4.96813e-15	1					0.08392	0.00272594	0.0324826		1.54574e-05
	c	2.69247e-10	3.93723e-11	2.74224e-14	0.000101848	2.74224e-14	2.15366e-15	1					0.04925	0.00113617	0.0230695		6.99987e-06
7	a	1.77596e-10	2.42396e-11	9.9337e-14	0.000559344	9.9337e-14	7.36288e-15	1	5	2.13636e-13	1.62172e-14	1.15062	0.0355	6.51692e-05	0.00183575	no cytotoxicty	1.25804e-05
8	a	1.03624e-10	1.08398e-11	1.27451e-13	0.00122993	1.27451e-13	7.6689e-15	1					0.04252	0.000244949	0.00576078		1.80679e-05
	b	6.11166e-11	1.64956e-11	6.75289e-13	0.0110492	6.75289e-13	4.13544e-14	1					0.03201	0.00209491	0.0654454		0.000117607
	c	1.47896e-10	1.23461e-11	1.75999e-13	0.00119002	1.75999e-13	2.70998e-14	1					0.05684	0.000601428	0.0105811		7.35657e-05
9	a	8.86818e-11	6.72325e-12	1.49407e-14	0.000168476	1.49407e-14	1.2482e-15	1	4	3.0377e-14	1.93357e-15	1.03317	0.01639	8.56145e-05	0.00522358	no cytotoxicty	3.1138e-06
	b	2.8187e-10	3.95249e-11	7.10299e-13	0.00251996	7.10299e-13	4.34037e-14	1					0.04218	0.000370766	0.0087901		0.000102337
10	a	3.77327e-11	4.79996e-12	1.25485e-13	0.00332562	1.25485e-13	8.0125e-15	1	2	1.2031e-13	7.61439e-15	-0.0430088	0.02192	4.97093e-05	0.00226776	no cytotoxicty	2.31561e-05
	b	4.8587e-11	9.91424e-12	1.96588e-14	0.00040461	1.96588e-14	1.53289e-15	1	2	4.57874e-14	2.97621e-15	1.32911	0.02773	3.11516e-05	0.00112339	no cytotoxicty	5.25573e-06
	c	4.51576e-11	4.47319e-12	3.55152e-14	0.000786471	3.55152e-14	3.38474e-15	1	3	1.32129e-13	7.53344e-15	2.72036	0.03156	6.72057e-05	0.00212946	no cytotoxicty	8.67642e-06
11	a	7.47136e-11	6.43387e-12	4.33644e-14	0.000580408	4.33644e-14	3.0529e-15	1	3	1.1688e-14	2.03092e-15	-2.71017	0.02408	0.000205753	0.00854457	no cytotoxicty	8.48917e-06
	b	3.43636e-10	4.61582e-11	1.44094e-13	0.000419322	1.44094e-13	8.56303e-15	1					0.0347	0.00186105	0.0536325		3.49136e-05
	c	1.18428e-10	1.07213e-11	7.60366e-14	0.000642049	7.60366e-14	4.65919e-15	1	3	8.65188e-14	5.75128e-15	0.137858	0.02062	8.39607e-05	0.00407181	no cytotoxicty	1.62774e-05
	d	3.21268e-10	5.71782e-11	4.18317e-13	0.00130208	4.18317e-13	2.66375e-14	1					0.1369	0.000241643	0.0017651		6.4349e-05
12	a	8.34843e-11	5.77599e-12	6.14278e-14	0.000735801	6.14278e-14	4.56996e-15	1	3	2.80342e-14	1.00648e-14	-1.19118	0.01611	6.36327e-05	0.00394989	no cytotoxicty	1.20605e-05
	b	8.61758e-11	6.31786e-12	7.86565e-14	0.000912744	7.84015e-14	3.17757e-15	0.996758	2	9.36694e-14	6.16781e-15	0.194739	0.0298	8.31597e-05	0.00279059	no cytotoxicty	1.24717e-05
	c	1.60054e-10	2.02505e-11	9.46876e-14	0.000591597	9.46876e-14	6.2515e-15	1					0.02993	5.32406e-05	0.00177884		1.10021e-05
	d	1.24461e-10	2.36065e-11	1.94646e-13	0.00156391	1.94646e-13	1.40517e-14	1	3	1.74763e-13	1.568e-14	-0.113772	0.03937	0.000121544	0.00308723	no cytotoxicty	1.98285e-05
13	a	1.46457e-10	2.55157e-11	7.01133e-14	0.000478729	7.01133e-14	6.42704e-15	1	2	2.19211e-13	1.59441e-14	2.12652	0.0459	0.00078138	0.0170235	6.06467e-06	1.68212e-05
14	a	3.60853e-11	2.99538e-12	4.05146e-14	0.00112275	4.05146e-14	2.86917e-15	1					<1.00E-02	4.41343e-05	-		1.24552e-05
	b	5.61512e-11	5.35647e-12	5.61856e-14	0.00100061	5.61856e-14	5.22577e-15	1	3	1.80666e-13	1.16093e-14	2.21552	0.02528	7.693e-05	0.00304312	no cytotoxicty	1.09829e-05
15	a	6.64069e-12	1.45998e-12	4.65121e-14	0.00700411	4.65121e-14	3.34084e-15	1	5	5.87188e-15	1.04524e-14	-6.92117	<1.00E-02	4.15181e-05	-	no cytotoxicty	9.52519e-06
	b	1.5184e-10	1.08994e-11	1.61029e-13	0.00106052	1.61029e-13	1.0367e-14	1					0.02702	0.000381948	0.0141358		4.41506e-05
	c	8.44588e-11	1.69969e-11	3.67764e-14	0.000435436	3.67764e-14	2.29984e-15	1	3	1.18586e-14	4.34086e-15	-2.10124	0.03217	7.55741e-05	0.00234921	no cytotoxicty	1.01732e-05
	d	1.51237e-10	2.7762e-11	8.09094e-14	0.000534984	8.09094e-14	5.24591e-15	1	4	8.56944e-14	1.32364e-14	0.0591394	0.03377	0.000597973	0.0177072	no cytotoxicty	2.0626e-05
16	a	1.30029e-11	1.18764e-12	3.73158e-14	0.00286979	3.73158e-14	2.87993e-15	1	2	2.52468e-14	3.04178e-15	-0.478042	<1.00E-02	2.00699e-05		no cytotoxicty	7.21665e-06
17	a	1.90079e-10	2.37095e-11	6.16554e-14	0.000324368	6.16554e-14	4.09557e-15	1					0.07156	0.000107545	0.00150286		1.4096e-05
	b	1.31607e-10	2.31575e-11	8.83931e-14	0.000671643	8.83931e-14	6.12246e-15	1	3	1.01335e-13	1.10821e-14	0.146411	0.08775	9.56615e-05	0.00109016	no cytotoxicty	1.95305e-05
	c	3.15885e-10	2.89387e-11	4.58285e-13	0.0014508	4.28478e-13	2.94661e-14	0.934959	4	3.88372e-13	3.67085e-14	-0.103266	0.1438	0.000137739	0.000957853	no cytotoxicty	2.24673e-05
18	a	3.02335e-10	5.68381e-11	7.10678e-14	0.000235063	7.10678e-14	5.24183e-15	1	3	1.33903e-13	1.0041e-14	0.884152	0.07563	0.000181671	0.0024021	no cytotoxicty	2.73335e-05
	b	9.46217e-11	1.49047e-11	5.64455e-14	0.000596539	5.64455e-14	3.82721e-15	1	3	4.93398e-14	5.13023e-15	-0.144016	0.04075	8.31949e-05	0.00204159	3.5e-06	1.68596e-05
	c	#VALUE!	#VALUE!	2.65271e-15	-	2.65271e-15	2.9123e-16	1	2	1.51559e-14	1.47371e-15	4.71336	0.05851	5.45176e-05	0.000931765	no cytotoxicty	1.78337e-06
19	a	9.36936e-11	1.07662e-11	8.08451e-14	0.000862867	8.08451e-14	1.28666e-14	1					0.02612	0.000254059	0.00972662		3.51004e-05
20	a	8.5619e-11	6.03646e-12	8.7202e-14	0.00101849	8.7202e-14	6.30278e-15	1	2	9.45521e-14	5.65218e-15	0.0842875	0.02695	3.00659e-05	0.00111562	no cytotoxicty	1.42924e-05
	b	1.60797e-10	2.65563e-11	3.71039e-14	0.00023075	3.71039e-14	2.62143e-15	1	2	3.75957e-14	2.46411e-15	0.0132565	0.06141	0.000135312	0.00220342	1.39e-06	7.59341e-06
	c	#DIV/0!		1.60137e-14	-	1.60137e-14	9.80914e-16	1					N/A	4.39486e-05	-		3.34834e-06
21	a	1.24878e-10	1.3271e-11	6.12429e-14	0.00049042	6.12429e-14	4.47695e-15	1	3	1.1119e-13	1.08994e-14	0.815566	0.03713	4.24022e-05	0.00114199	no cytotoxicty	8.19443e-06
	b	1.14344e-10	1.4123e-11	8.0965e-14	0.000708081	8.0965e-14	5.94442e-15	1					0.04283	0.000166849	0.00389562		1.40103e-05
	c	#DIV/0!		1.86005e-13	-	1.86005e-13	1.27268e-14	1	4	1.42545e-13	1.70403e-14	-0.30489	N/A	0.000273105	-	2.34e-05	1.8897e-05
	d	1.57363e-09	2.47034e-10	2.13257e-13	0.00013552	2.13257e-13	1.40834e-14	1					0.0839	0.000417798	0.00497972		1.16779e-05
	e	3.03541e-10	3.00438e-11	3.4983e-13	0.0011525	3.4983e-13	2.39228e-14	1					0.08356	0.000213875	0.00255953		2.29571e-05
	f	2.21124e-09	5.80583e-10	3.69613e-13	0.000167151	3.69613e-13	2.41289e-14	1	5	2.60729e-13	3.32384e-14	-0.417614	0.08686	0.000844763	0.00972557	no cytotoxicty	3.62276e-05
22	a	4.49256e-11	3.09904e-12	1.90574e-14	0.0004242	1.90574e-14	1.41883e-15	1	2	2.83529e-14	1.64206e-15	0.487763	0.01952	1.60154e-05	0.000820462	no cytotoxicty	2.80381e-06
	b	7.9447e-11	1.76213e-11	4.41909e-14	0.000556231	4.41909e-14	4.12188e-15	1	2	1.14906e-13	8.00867e-15	1.60022	0.03552	4.40815e-05	0.00124103	7.93e-06	1.1021e-05
	c	3.38995e-11	5.70223e-12	7.61503e-14	0.00224635	7.61503e-14	5.61043e-15	1	4	1.30594e-13	1.12183e-14	0.714956	0.01466	8.85114e-05	0.00603761	no cytotoxicty	7.92357e-06
	d	7.61521e-11	9.25121e-12	3.22407e-14	0.000423372	3.22407e-14	2.12056e-15	1					0.02772	0.000528247	0.0190565	9.16e-06	6.39678e-06
	e	#DIV/0!		1.26649e-13	-	1.26649e-13	8.30757e-15	1					N/A	9.44285e-05	-		1.10951e-05
23	a	7.43887e-11	8.28647e-12	5.46097e-14	0.000734113	5.46097e-14	4.04063e-15	1	1	7.02894e-14	4.99478e-15	0.287122	0.02549	1.20415e-05	0.000472402	no cytotoxicty	4.61549e-06
	b	1.55321e-10	2.09904e-11	1.12844e-12	0.00726523	1.12707e-12	7.96086e-14	0.998786	6	1.50553e-12	1.05222e-13	0.335786	0.09886	0.00120766	0.0122159	no cytotoxicty	0.000117071
	c	1.09936e-10	1.03194e-11	1.13605e-13	0.00103338	1.13605e-13	8.03422e-15	1	4	1.83215e-13	1.52863e-14	0.612732	0.03138	0.000126947	0.00404547	no cytotoxicty	1.35683e-05
	d	1.90589e-10	2.34015e-11	2.52508e-13	0.00132488	2.52508e-13	1.67004e-14	1					0.0378	0.00470243	0.124403		2.44545e-05
	e	1.50216e-10	2.67523e-11	2.56609e-13	0.00170827	2.56609e-13	1.84648e-14	1					0.04318	0.000276237	0.00639733		2.24174e-05
	f	7.71731e-11	1.10136e-11	3.36843e-14	0.000436478	3.36843e-14	2.36028e-15	1	3	7.66057e-14	6.11307e-15	1.27422	0.02957	8.50926e-05	0.00287767	no cytotoxicty	5.24894e-06
24	a	2.95652e-10	2.81506e-11	9.16289e-13	0.00309921	9.16289e-13	6.42718e-14	1	5	7.3432e-13	8.74379e-14	-0.247807	0.04941	0.000748422	0.0151472	9.24e-05	5.99573e-05
	b	1.10353e-10	2.44347e-11	3.87015e-13	0.00350706	3.87015e-13	3.09122e-14	1					0.04456	0.000174639	0.00391919		4.6467e-05
	c	2.94771e-10	4.37809e-11	4.98669e-13	0.00169172	4.98669e-13	3.40117e-14	1	5	5.04009e-13	5.20611e-14	0.0107092	0.02683	0.000249056	0.00928276	no cytotoxicty	2.84303e-05
	d	1.1272e-10	1.32639e-11	4.9585e-13	0.00439895	4.9585e-13	3.35757e-14	1	4	4.38768e-13	3.47108e-14	-0.130097	0.03793	0.000199777	0.005267	no cytotoxicty	3.30573e-05
25	a	5.31812e-11	4.71379e-12	1.18538e-13	0.00222895	1.18538e-13	8.42287e-15	1	3	1.40234e-13	9.66831e-15	0.18303	0.01354	4.57258e-05	0.00337709	no cytotoxicty	1.4972e-05
	b	1.8567e-10	2.54403e-11	5.75386e-14	0.000309897	5.75386e-14	3.53593e-15	1					0.0386	5.2686e-05	0.00136492		1.19586e-05
	c	2.69711e-10	4.39954e-11	3.0382e-14	0.000112646	3.0382e-14	2.17835e-15	1					0.02511	0.000241719	0.00962641		6.65649e-06
26	a	1.30122e-10	1.18501e-11	1.26513e-12	0.00972266	1.26503e-12	8.73475e-14	0.999919	2	1.21834e-12	2.31232e-13	-0.0383259	0.03559	0.000373604	0.0104974	no cytotoxicty	6.05341e-05
	b	1.53789e-10	1.98794e-11	2.55369e-12	0.0166051	2.54536e-12	1.74704e-13	0.996738	6	2.07413e-12	2.8215e-13	-0.227195	0.03762	0.000495358	0.0131674	no cytotoxicty	0.000121416
	c	6.79847e-11	1.00977e-11	3.80601e-13	0.00559833	3.80601e-13	2.54243e-14	1	3	5.05353e-13	4.16156e-14	0.327778	0.02643	0.000214474	0.0081148	6.13e-05	5.57882e-05
	d	#DIV/0!		2.16216e-13	-	2.15487e-13	1.2776e-14	0.996628	2	2.51771e-13	2.14262e-14	0.168379	N/A	0.000533486	-	no cytotoxicty	1.8094e-05
27	a	1.57316e-10	1.07638e-11	5.05752e-13	0.00321488	5.05752e-13	3.4783e-14	1	4	4.83081e-13	2.99514e-14	-0.0469308	0.02178	0.000215713	0.00990417	no cytotoxicty	1.95572e-05
	b	1.9639e-10	2.16567e-11	2.44411e-13	0.00124452	2.44411e-13	1.66579e-14	1					0.06897	0.000120071	0.00174092		1.90489e-05
	c	6.59428e-11	8.65233e-12	9.71503e-15	0.000147325	9.71503e-15	1.05972e-15	1					0.01955	1.71533e-05	0.000877407		3.09813e-06
	d	2.80106e-11	6.44221e-12	4.69705e-14	0.00167688	4.69705e-14	3.78172e-15	1	1	1.38833e-13	1.49535e-14	1.95574	0.03427	0.00144176	0.0420707	5.28e-06	6.26467e-06
	e	#DIV/0!		1.44335e-13	-	1.44335e-13	1.02002e-14	1					N/A	0.000176804	-		1.45658e-05
	f	#DIV/0!		1.94334e-13	-	1.94334e-13	1.31828e-14	1	4	2.49003e-13	1.97877e-14	0.281317	N/A	0.000100106	-	no cytotoxicty	1.1257e-05
28	a	5.01648e-11	5.64799e-12	2.10425e-14	0.000419468	2.10425e-14	1.24584e-15	1					0.04636	1.79205e-05	0.00038655	1.15e-05	2.93927e-06
29	a	1.3105e-10	1.51965e-11	1.32633e-13	0.00101208	1.32633e-13	8.6026e-15	1					0.03902	0.000189551	0.0048578		2.67116e-05
30	a	1.75739e-09	2.32183e-10	1.67655e-13	9.53998e-05	1.67655e-13	2.06092e-14	1					0.9626	0.00131392	0.00136497		4.71912e-05
31	a	2.93054e-10	2.54196e-11	8.14495e-14	0.000277934	8.14495e-14	5.78595e-15	1	4	8.62164e-14	1.04828e-14	0.0585258	0.04002	2.70631e-05	0.000676241	no cytotoxicty	9.54195e-06
	b	7.29965e-10	1.04353e-10	5.66721e-13	0.000776367	5.66721e-13	3.85195e-14	1	4	4.13506e-13	4.76197e-14	-0.370528	0.165	0.000314218	0.00190435	no cytotoxicty	4.22448e-05
	c	7.53632e-10	6.09598e-11	1.46854e-12	0.00194861	1.46854e-12	1.17595e-13	1					0.05458	0.00243502	0.0446138		0.000167607
	d	1.23301e-09	1.31953e-10	1.25233e-12	0.00101567	1.25233e-12	8.53065e-14	1					0.1449	0.000555827	0.00383594		7.02795e-05
32	a	9.5457e-11	2.54349e-11	6.87158e-14	0.000719861	6.87158e-14	4.89537e-15	1					0.0387	4.4305e-05	0.00114483		5.55786e-06
	b	1.49659e-10	2.02327e-11	6.61815e-14	0.000442215	6.61815e-14	4.42506e-15	1					0.03845	4.62596e-05	0.00120311		8.00353e-06
	c	8.39019e-11	9.66477e-12	1.40735e-13	0.00167738	1.40735e-13	1.85738e-14	1					0.04018	0.000807939	0.020108		4.57529e-05
33	a	6.10238e-11	5.50129e-12	2.31127e-13	0.0037875	2.31127e-13	1.57532e-14	1	3	1.61768e-13	1.35536e-14	-0.428761	0.01349	3.7184e-05	0.00275641	no cytotoxicty	1.04588e-05
	b	6.22768e-11	1.03192e-11	6.67906e-13	0.0107248	6.67906e-13	4.57116e-14	1	3	2.56013e-13	5.1556e-14	-1.60887	0.04474	0.00012531	0.00280086	no cytotoxicty	2.61553e-05
	c	4.61229e-11	4.82545e-12	5.45318e-13	0.0118232	5.45318e-13	3.71604e-14	1					0.02256	7.91372e-05	0.00350785		1.37685e-05
34	a	1.06362e-10	1.45857e-11	1.40399e-13	0.00132001	1.40399e-13	9.77313e-15	1					0.04405	0.000102348	0.00232344		8.54449e-06
35	a	4.71484e-10	4.29014e-11	1.36213e-13	0.000288902	1.36213e-13	9.33502e-15	1	2	8.61962e-14	1.57346e-14	-0.580265	0.3568	6.64454e-05	0.000186226	no cytotoxicty	8.1488e-06
36	a	1.28962e-10	2.15807e-11	4.42492e-13	0.00343118	4.42492e-13	3.03383e-14	1	6	4.7783e-13	6.49541e-14	0.0798597	0.03835	0.000108331	0.0028248	no cytotoxicty	2.55733e-05
	b	1.60147e-10	1.95328e-11	3.48383e-13	0.00217539	3.48383e-13	2.38351e-14	1	2	1.96434e-13	3.8404e-14	-0.773531	0.04699	6.84289e-05	0.00145624	9.62e-06	1.77499e-05
	c	1.05249e-10	1.14647e-11	4.09514e-14	0.000389092	4.09514e-14	4.65956e-15	1					0.05008	7.81948e-05	0.0015614		1.66661e-05
	d	1.07894e-10	1.06146e-11	3.29284e-13	0.00305193	3.29284e-13	2.25506e-14	1	3	3.98031e-13	6.34973e-14	0.208777	0.02826	0.000354584	0.0125472	no cytotoxicty	1.57279e-05
37	a	7.98646e-11	7.63837e-12	2.60559e-13	0.00326251	2.60457e-13	2.92882e-14	0.999609	4	2.37281e-13	5.01202e-14	-0.09767	0.01697	0.000128257	0.00755789	no cytotoxicty	1.23636e-05
	b	1.54021e-10	1.9883e-11	1.85929e-12	0.0120716	1.85664e-12	1.68919e-13	0.998574	5	8.90645e-13	3.37056e-13	-1.0846	0.04548	0.000437062	0.00960998	no cytotoxicty	8.28351e-05
	c	1.70171e-10	1.76559e-11	1.08891e-12	0.00639896	1.08891e-12	1.26131e-13	1					0.03959	0.000428857	0.0108325		4.96278e-05
	d	8.85425e-11	1.12512e-11	1.34893e-12	0.0152349	1.34893e-12	1.23556e-13	1	6	1.16007e-12	3.18766e-13	-0.162803	0.02589	0.000355008	0.0137121	no cytotoxicty	5.92419e-05
38	a	1.44601e-10	1.32663e-11	2.09781e-15	1.45076e-05	2.09781e-15	1.30955e-16	1	1	2.80319e-15	5.37218e-16	0.336248	0.04485	2.12594e-05	0.000474011	2.32e-07	8.97865e-07
	b	9.49001e-11	9.13272e-12	5.91215e-15	6.22987e-05	5.91215e-15	4.35741e-16	1	3	1.17896e-14	1.14773e-15	0.994122	0.02863	8.60205e-06	0.000300456	no cytotoxicty	9.9051e-07
	c	1.27709e-10	2.08238e-11	1.72484e-14	0.00013506	1.72484e-14	1.15935e-15	1					0.0838	1.68294e-05	0.000200828		1.8438e-06
	d	4.53479e-10	4.74989e-11	2.56339e-14	5.65273e-05	2.56339e-14	2.03715e-15	1	3	1.00348e-14	3.31759e-15	-1.5545	0.09829	0.000141888	0.00144356	7.59e-06	9.13072e-06
	e	2.15324e-10	2.38777e-11	5.023e-15	2.33277e-05	5.023e-15	5.28517e-16	1	2	1.82806e-14	1.52987e-15	2.63939	0.08781	2.10599e-05	0.000239834	no cytotoxicty	2.18257e-06
39	a	9.3972e-12	1.41411e-12	9.67626e-16	0.00010297	9.67626e-16	5.63821e-17	1					<1.00E-02	1.34898e-06	-		2.13555e-07
40	a	2.07156e-10	1.89586e-11	3.45961e-14	0.000167005	3.45961e-14	2.62191e-15	1	3	3.00133e-14	8.36037e-15	-0.152693	0.04113	1.3149e-05	0.000319694	no cytotoxicty	3.52184e-06
	b	2.65117e-10	2.60048e-11	5.22547e-13	0.001971	5.22547e-13	3.541e-14	1	4	5.43433e-13	5.39537e-14	0.0399703	0.07843	0.000203082	0.00258934	no cytotoxicty	4.79825e-05
41	a	3.11477e-11	2.3483e-12	5.64986e-14	0.0018139	5.64986e-14	4.28858e-15	1	3	3.25682e-14	4.14059e-15	-0.734778	0.01066	2.36749e-05	0.00222091	no cytotoxicty	1.06811e-05
	b	2.30684e-11	3.57039e-12	1.66048e-14	0.000719808	1.66048e-14	1.14434e-15	1	2	1.32957e-14	1.40736e-15	-0.248891	0.01954	0.000103915	0.00531807	no cytotoxicty	1.81975e-06
42	a	2.23352e-10	2.93894e-11	5.60048e-14	0.000250747	5.60048e-14	3.74406e-15	1					0.1464	3.08294e-05	0.000210584		5.25981e-06
	b	1.99963e-10	3.90974e-11	1.03366e-13	0.000516927	1.03366e-13	7.07278e-15	1					0.05518	3.99108e-05	0.000723284		9.16171e-06
43	a	2.5811e-10	2.6269e-11	1.12416e-14	4.35536e-05	1.12416e-14	7.05701e-16	1	2	2.414e-14	8.60194e-15	1.14738	0.04742	2.51542e-05	0.000530455	6.11447e-06	3.91842e-06
	b	1.12442e-10	1.7724e-11	6.3976e-15	5.68971e-05	6.3976e-15	5.05734e-16	1	1	9.94637e-15	1.39585e-15	0.554702	0.03476	1.38754e-05	0.000399176	3.96553e-06	2.61897e-06
44	a	2.337e-10	1.99033e-11	8.48683e-13	0.0036315	8.48683e-13	5.03845e-14	1					0.05828	0.000174626	0.00299633		0.000109377
	b	2.06692e-10	2.81187e-11	2.80313e-13	0.00135619	2.80313e-13	1.72363e-14	1					0.1374	0.000236228	0.00171927		4.88861e-05
	c	4.76589e-10	8.0168e-11	1.27779e-13	0.000268112	1.27779e-13	1.98567e-14	1					0.1001	0.00287908	0.028762		5.82094e-05
	d	3.56583e-10	6.58864e-11	2.33878e-13	0.000655887	2.33878e-13	1.57413e-14	1	2	5.397e-13	3.88615e-14	1.30761	0.08373	0.000824345	0.00984528	no cytotoxicty	7.82075e-05
	e	2.34721e-10	3.15572e-11	1.79279e-13	0.000763797	1.79279e-13	1.07214e-14	1					0.08846	5.72276e-05	0.000646931		2.84287e-05

## Sheet: Table S9
Table S9: Dichlorvos equivalent concentrations (Dichlorvos-EQ) for, both, bioanalysis (Dichlorvos-BEQbio,iceberg) and chemical analysis (Dichlorvos-BEQchem) and toxic units for cytotoxicity (TUcytotoxicity) for both bioanalysis (TUcytotoxicity(bio, iceberg)) and chemical analysis (TUcytotoxicity(chem)) in the AREc32 assay.
Site ID	Sample ID	Dichlorvos-BEQbio,iceberg (M)	SE	Dichlorvos-BEQchem (M)	% Dichlorvos-BEQbio,iceberg explained	Dichlorvos-BEQchem,tip (M)	SE	Dichlorvos-BEQchem,tip /Dichlorvos-BEQchem	number of chemicals in tip mixture (of 16)	Dichlorvos-BEQbio,tip (M)	SE	IPQ	TUcytotoxicity(bio, iceberg)	TUcytotoxicity(chem)	% TUcytotoxicity (bio, iceberg) explained	TUcytotoxicity(bio,tip)	TUcytotoxicity(chem,tip)
1	a	9.7174e-08	7.28037e-09	-	-								<1.00E-02	1.53295e-07	-
2	a	1.3378e-06	8.23143e-08	2.35073e-09	0.00175716	1.82658e-09	1.30961e-10	0.777029					N/A	0.000213949	-		3.25916e-05
	b	Cytotoxic		8.65048e-10	-	8.65048e-10	5.4645e-11	1					0.07838	3.61e-05	0.000460577		3.2263e-06
	c	1.09063e-06	1.04354e-07	5.62738e-10	0.000515976	5.62738e-10	3.55481e-11	1					0.0767	1.82139e-06	2.37469e-05		2.0988e-06
3	a	7.28574e-07	7.07053e-08	5.14021e-09	0.00705516	5.0432e-09	1.13228e-10	0.981127	10	9.04274e-09	6.16016e-10	0.793057	0.03755	0.000160378	0.00427105	3.42862e-05	9.95607e-05
	b	7.36428e-07	5.88435e-08	1.27439e-09	0.0017305	1.12343e-09	6.18919e-11	0.881548					0.04038	0.000115664	0.0028644		1.69448e-05
	c	6.25856e-07	7.39589e-08	3.69348e-09	0.00590148	3.62999e-09	1.30498e-10	0.982811	8	7.07346e-09	3.10821e-10	0.948615	0.04214	0.000223734	0.00530931	1.4649e-05	0.000111628
	d	7.7539e-07	7.07322e-08	2.78664e-09	0.00359385	2.48943e-09	1.64596e-10	0.893345	10	6.02603e-09	2.7135e-10	1.42065	0.07219	0.000290666	0.0040264		7.34187e-05
4	a	1.11357e-06	8.16825e-08	5.21537e-09	0.00468345	4.92155e-09	3.30575e-10	0.943663	12	6.41291e-09	3.48197e-10	0.303026	0.04129	0.000293895	0.00711783		0.000102305
	b	1.00239e-06	5.32231e-08	1.32674e-09	0.00132358	1.17288e-09	7.6081e-11	0.884035	11	2.06582e-09	9.63606e-11	0.761313	0.03846	0.000237899	0.00618562	3.63896e-05	3.51148e-05
5	a	3.49734e-07	5.47898e-08	2.08033e-09	0.00594833	1.96605e-09	1.43036e-10	0.945063					0.02946	0.000158172	0.00536906		5.24252e-05
	b	5.90128e-07	5.90526e-08	7.393e-10	0.00125278	6.5259e-10	5.38354e-11	0.882713					0.03515	9.09729e-05	0.00258813		2.29128e-05
	c	Cytotoxic		5.71868e-10	-	5.33187e-10	4.74104e-11	0.93236					0.07429	0.000146252	0.00196866		2.18107e-05
	d	Cytotoxic		6.228e-10	-	6.17189e-10	5.16099e-11	0.990992					0.04101	0.000102729	0.00250496		2.16966e-05
6	a	Cytotoxic		6.14144e-10	-	5.51109e-10	3.75961e-11	0.89736					0.1607	7.34831e-05	0.000457269		1.16114e-05
	b	Cytotoxic		1.00181e-08	-	9.92247e-09	8.12849e-10	0.990455					0.1543	0.000889808	0.00576674		0.000782974
	c	Cytotoxic		4.41885e-09	-	4.28602e-09	3.5196e-10	0.96994	8	6.50905e-09	3.64822e-10	0.51867	0.08581	0.000550769	0.00641847	0.00014772	0.000326846
7	a	9.48486e-07	1.22735e-07	8.26852e-10	0.000871759	7.54799e-10	4.60412e-11	0.912859					0.04606	8.79563e-05	0.0019096		1.46833e-05
8	a	1.40941e-06	8.73483e-08	5.44735e-10	0.000386499	5.38831e-10	3.41693e-11	0.989162					0.07113	0.000392451	0.00551738		1.7917e-05
	b	1.53322e-06	1.54354e-07	1.22241e-07	0.0797279	1.21838e-07	2.30478e-10	0.996703					0.04147	0.00365146	0.0880507		0.00248648
			8.73126e-08	8												0.000375728	0.000143347
9	a	6.27858e-07	3.45462e-08	6.36397e-10	0.0010136	6.10063e-10	3.3929e-11	0.958621					0.01126	8.60601e-05	0.00764299		1.51008e-05
	b	1.62008e-06	1.11596e-07	6.35826e-09	0.00392466	6.20928e-09	1.68081e-10	0.97657	11	9.90168e-09	6.52494e-10	0.594657	0.03671	0.000966041	0.0263155	3.24361e-05	0.000140364
10	a	4.47524e-07	2.33654e-08	7.46157e-10	0.0016673	6.90133e-10	5.31971e-11	0.924917					0.01798	0.000138957	0.00772842		2.61789e-05
	b	7.51058e-07	7.24394e-08	3.62292e-10	0.000482375	3.31782e-10	2.90651e-11	0.915786					0.02565	9.3365e-05	0.00363996		1.30008e-05
	c	4.4968e-07	3.35247e-08	4.02294e-10	0.000894622	3.7362e-10	2.29546e-11	0.928724	8	5.16757e-10	2.2492e-11	0.383109	0.02154	7.36184e-05	0.00341776	1.02008e-05	6.63185e-06
11	a	5.57942e-07	2.54531e-08	9.90487e-10	0.00177525	8.59174e-10	5.60602e-11	0.867426					<1.00E-02	0.000272589	-		2.3727e-05
	b	1.25695e-06	6.85527e-08	1.12588e-08	0.00895727	1.11158e-08	6.12722e-10	0.987299	11	1.37347e-08	7.2529e-10	0.235599	0.02764	0.00244291	0.088383	9.99925e-05	0.000574951
	c	1.06583e-06	5.31966e-08	1.22841e-09	0.00115254	1.21363e-09	7.56102e-11	0.987968					0.03356	0.000151741	0.00452149		2.67056e-05
	d	3.08308e-06	1.99954e-07	2.10704e-09	0.000683419	2.00193e-09	1.28053e-10	0.950119					0.04961	0.000286278	0.00577057		3.58842e-05
12	a	5.98906e-07	2.91269e-08	5.90574e-10	0.000986087	5.57278e-10	3.59286e-11	0.943622					<1.00E-02	6.59093e-05	-		1.73638e-05
	b	6.15076e-07	3.09807e-08	1.12808e-09	0.00183405	1.04855e-09	6.84687e-11	0.929494					0.0194	0.000134812	0.00694906		2.34208e-05
	c	8.09578e-07	4.52411e-08	7.32312e-10	0.00090456	6.85363e-10	4.47142e-11	0.935889					0.0228	8.44693e-05	0.0037048		1.58322e-05
	d	1.54616e-06	1.34338e-07	9.23247e-10	0.000597122	8.15534e-10	5.86984e-11	0.883333					0.03767	0.000165112	0.00438311		2.20676e-05
13	a	1.25772e-06	8.67455e-08	1.59944e-08	0.012717	1.58751e-08	1.12033e-09	0.992544	11	2.15428e-08	1.991e-09	0.357016	0.02098	0.000669149	0.0318946	0.000390921	0.000438915
14	a	3.4111e-07	1.5777e-08	4.01047e-10	0.00117571	3.67973e-10	2.9106e-11	0.917531					<1.00E-02	8.95558e-05	-		2.21983e-05
	b	5.42388e-07	5.35349e-08	2.09645e-09	0.00386522	2.01991e-09	1.18087e-10	0.963493	9	2.26452e-09	1.58511e-10	0.121099	0.01711	8.21335e-05	0.00480032	3.86294e-05	2.86768e-05
15	a	8.33294e-08	7.06694e-09	5.728e-10	0.00687393	5.61752e-10	3.57389e-11	0.980713					<1.00E-02	3.46749e-05	-		9.7499e-06
	b	1.1915e-06	5.81125e-08	2.41137e-09	0.00202382	2.22233e-09	1.384e-10	0.921605					0.02069	0.00049173	0.0237665		6.17118e-05
	c	6.81758e-07	3.49902e-08	1.11796e-09	0.00163982	1.05837e-09	6.93016e-11	0.946701					0.01618	8.5364e-05	0.0052759		2.27519e-05
	d	1.56772e-06	1.02216e-07	1.74365e-09	0.00111222	1.56106e-09	1.06009e-10	0.895283					0.02143	0.000412044	0.0192275		2.93289e-05
16	a	1.46747e-07	8.17585e-09	3.26441e-10	0.00222452	3.26361e-10	2.07724e-11	0.999755					<1.00E-02	2.71925e-05	-		1.15768e-05
17	a	9.98228e-07	4.99182e-08	1.51936e-09	0.00152206	1.48319e-09	1.04446e-10	0.97619					0.03618	0.00021515	0.00594665		4.55667e-05
	b	1.15269e-06	8.74163e-08	2.14688e-09	0.0018625	2.06561e-09	1.35533e-10	0.962146					0.01834	0.000249243	0.0135902		4.33032e-05
	c	1.43235e-06	1.21115e-07	2.59183e-10	0.000180949	2.0876e-10	1.41808e-11	0.805453					0.09116	0.000109788	0.00120435		6.03886e-06
18	a	Cytotoxic		1.89482e-09	-	1.54703e-09	1.00938e-10	0.81645	11	1.80498e-09	9.78988e-11	0.166742	0.09888	0.000388052	0.00392447	9.83484e-05	3.98784e-05
	b	Cytotoxic		7.41089e-10	-	6.74023e-10	4.23908e-11	0.909503					0.04849	9.25984e-05	0.00190964		1.52131e-05
	c	2.60106e-07	1.66972e-08	5.0796e-10	0.0019529	4.70955e-10	2.75524e-11	0.92715					0.01421	5.83892e-05	0.00410902		1.53919e-05
19	a	3.3341e-06	1.71852e-07	1.26151e-09	0.000378365	1.01213e-09	7.04369e-11	0.80232	3	1.4385e-09	1.03097e-10	0.421262	0.03299	0.000177692	0.00538623	8.50579e-06	2.52063e-05
20	a	4.79556e-07	2.34455e-08	1.52489e-09	0.0031798	1.52103e-09	9.7029e-11	0.99747	5	1.81129e-09	9.78908e-11	0.190828	<1.00E-02	7.99619e-05	-	7.87024e-05	5.12492e-05
	b	1.00408e-06	6.52984e-08	6.2344e-10	0.000620907	5.35594e-10	3.415e-11	0.859094					0.05924	0.000352032	0.00594248		1.29779e-05
	c	3.69446e-06	3.77769e-07	2.82587e-10	7.64894e-05	2.73971e-10	1.72838e-11	0.96951					0.2287	8.48645e-05	0.000371074		1.05086e-06
21	a	9.22152e-07	4.4319e-08	8.09559e-10	0.000877902	7.69461e-10	5.35655e-11	0.950469	4	2.97236e-09	1.73352e-10	2.86291	0.01326	0.000505631	0.038132	3.96324e-06	1.50841e-05
	b	8.96126e-07	8.82362e-08	1.35943e-09	0.001517	1.22725e-09	7.70083e-11	0.902771					0.0302	0.000179982	0.00595965		4.17987e-05
	c	1.19874e-06	5.77438e-08	2.49797e-09	0.00208384	1.78517e-09	1.39138e-10	0.714649					0.03243	0.000326008	0.0100527		6.83183e-05
	d	Cytotoxic		1.5519e-09	-	1.53014e-09	1.1587e-10	0.985981	6	2.25796e-09	1.27933e-10	0.475649	0.1623	0.000173847	0.00107114	3.67359e-05	8.28121e-05
	e	Cytotoxic		1.2184e-09	-	1.15699e-09	8.23501e-11	0.949596					0.1078	0.00018829	0.00174666		3.89068e-05
	f	2.1791e-06	1.39504e-07	4.03661e-09	0.00185242	3.92155e-09	2.86162e-10	0.971495	7	7.47965e-09	4.6929e-10	0.907323	N/A	0.000473601	-	7.53428e-05	0.000163101
22	a	3.21398e-07	1.79729e-08	7.20031e-10	0.00224031	6.80991e-10	4.43565e-11	0.945781					<1.00E-02	5.65101e-05	-		4.09179e-05
	b	4.34742e-07	2.38901e-08	4.90272e-10	0.00112773	4.51075e-10	2.79052e-11	0.920051					0.01751	9.926e-05	0.00566876		1.00118e-05
	c	3.8808e-07	2.28215e-08	8.31949e-10	0.00214376	7.80665e-10	4.96844e-11	0.938357	9	8.77199e-10	4.09286e-11	0.123655	<1.00E-02	0.000115845	-	1.32468e-05	1.72463e-05
	d	1.09155e-06	7.68821e-08	2.1083e-09	0.00193147	2.00834e-09	1.58498e-10	0.95259	5	3.01651e-09	1.67175e-10	0.501988	N/A	0.00030592	-	0.000166287	0.00014544
	e	6.67744e-06	4.46958e-07	6.32903e-10	9.47823e-05	5.33016e-10	3.53212e-11	0.842176					<2.63E-01	0.000149258	-		2.52104e-06
23	a	3.25402e-07	1.57498e-08	1.00414e-09	0.00308584	5.63793e-10	3.64584e-11	0.56147					<1.00E-02	7.42157e-05	-		3.34883e-05
	b	Cytotoxic		7.4183e-09	-	6.72469e-09	3.94595e-10	0.9065	9	8.8928e-09	4.34782e-10	0.32241	0.1439	0.00194488	0.0135155	0.00013104	0.000268832
	c	7.34734e-07	4.12988e-08	1.13563e-09	0.00154563	9.03147e-10	5.58191e-11	0.795284	9	1.15463e-09	7.79267e-11	0.278449	0.03176	0.000209824	0.00660654	6.96962e-05	3.60686e-05
	d	7.14252e-07	6.03453e-08	2.23238e-09	0.00312548	2.19942e-09	1.50618e-10	0.985234					0.05666	0.00327563	0.057812		4.57789e-05
	e	8.93046e-07	5.40639e-08	1.57477e-09	0.00176336	1.39055e-09	8.78267e-11	0.88302					N/A	0.00108007	-		6.58474e-05
	f	4.6585e-07	3.34691e-08	2.95389e-10	0.000634086	2.01324e-10	1.26824e-11	0.681557					N/A	0.000430489	-		3.29656e-06
24	a	9.64656e-07	6.50922e-08	7.28964e-09	0.00755672	2.30722e-09	1.48486e-10	0.316507	6	3.19915e-09	1.68296e-10	0.386583	0.03909	0.000860885	0.0220232	3.21171e-05	0.000101296
	b	8.94586e-07	9.17903e-08	1.61475e-09	0.00180502	1.21113e-09	7.2072e-11	0.750044	10	2.37825e-09	1.12549e-10	0.963658	0.06904	0.000318762	0.00461706	3.01176e-05	3.58572e-05
	c	7.8694e-07	3.81668e-08	8.90205e-10	0.00113122	7.03474e-10	4.44532e-11	0.790239					0.01081	0.000394317	0.036477		4.73311e-06
	d	1.74328e-06	8.35991e-08	1.45758e-09	0.000836112	1.07115e-09	6.84621e-11	0.734881					0.02711	0.000555038	0.0204735		2.86002e-05
25	a	4.6893e-07	2.28757e-08	1.36449e-09	0.00290979	1.22663e-09	7.84073e-11	0.898966					<1.00E-02	8.23826e-05	-		4.34147e-05
	b	Cytotoxic		9.15869e-10	-	9.11769e-10	5.76132e-11	0.995523					0.02851	5.52327e-05	0.00193731		4.07208e-06
	c	3.90082e-07	3.20866e-08	4.49999e-10	0.0011536	3.93387e-10	2.48737e-11	0.874194					0.02472	0.000331186	0.0133975		3.54081e-06
26	a	5.44698e-07	2.53277e-08	6.59378e-10	0.00121054	4.48268e-10	2.86549e-11	0.679835					0.02352	0.000313598	0.0133333		1.04645e-05
	b	7.49672e-07	4.77753e-08	1.63108e-09	0.00217572	1.33513e-09	8.74459e-11	0.818557					0.03794	0.000453369	0.0119496		2.75798e-05
	c	2.30846e-06	1.26205e-07	3.78387e-09	0.00163913	1.35983e-09	9.30405e-11	0.359375					N/A	0.000467198	-		4.6167e-05
	d	6.5989e-06	4.27518e-07	1.20775e-09	0.000183023	4.94397e-10	3.17798e-11	0.409353					0.2655	0.000530496	0.0019981		2.68378e-06
27	a	8.19742e-07	4.34191e-08	1.94815e-09	0.00237655	1.26568e-09	8.17242e-11	0.649681					0.01764	0.000197929	0.0112205		5.40825e-05
	b	1.5323e-06	9.47777e-08	1.45047e-09	0.000946596	1.17502e-09	7.61443e-11	0.8101					0.04311	0.000130279	0.00302202		2.35484e-05
	c	2.60568e-07	2.04e-08	2.11776e-10	0.000812749	2.02175e-10	1.25111e-11	0.954663					0.01662	1.22634e-05	0.000737871		2.00197e-06
	d	2.55178e-06	2.56162e-07	4.78835e-09	0.00187647	4.77561e-09	3.98407e-10	0.997341	5	6.96736e-09	4.94395e-10	0.458945	N/A	0.000431969	-	0.000501856	0.000417609
	e	1.35089e-05	1.61071e-06	7.09248e-10	5.25024e-05	5.12478e-10	3.24568e-11	0.722565					1.214	0.000149184	0.000122886		2.24314e-06
	f	8.13736e-06	5.33473e-07	6.23578e-10	7.66315e-05	5.4684e-10	3.48773e-11	0.876939					<2.63E-01	0.000131631	-		2.18151e-06
28	a	6.62046e-07	3.54278e-08	2.98461e-10	0.000450816	2.90636e-10	1.89586e-11	0.973784					0.02005	2.85959e-05	0.00142623		1.5476e-05
29	a	5.26834e-07	2.83519e-08	7.00944e-10	0.00133048	5.13656e-10	3.35034e-11	0.732806	8	5.63654e-10	3.50568e-11	0.0973367	0.01413	0.000224518	0.0158894	3.03749e-05	1.97391e-05
30	a	Cytotoxic		1.27799e-08	-	1.25664e-08	8.26861e-10	0.983295	7	8.65794e-09	7.45571e-10	-0.451428	3.494	0.000875158	0.000250475	0.000314414	0.000417377
31	a	Cytotoxic		5.26695e-10	-	4.8114e-10	3.01245e-11	0.913507					0.07285	3.92963e-05	0.000539413		7.14821e-06
	b	Cytotoxic		2.21297e-09	-	1.86205e-09	1.3349e-10	0.841427					N/A	0.000256585	-		3.61068e-05
	c	Cytotoxic		4.22265e-09	-	3.01254e-09	1.94088e-10	0.713425					0.1595	0.00144214	0.00904161		1.64823e-05
	d	Cytotoxic		2.57746e-09	-	2.37003e-09	1.65454e-10	0.919521					0.2723	0.000366133	0.0013446		6.89557e-05
32	a	5.50704e-07	3.18787e-08	8.56082e-10	0.00155452	6.75106e-10	4.59354e-11	0.788599	7	1.93538e-09	1.33583e-10	1.86678	0.02092	5.52187e-05	0.00263952	1.30945e-05	1.35171e-05
	b	Cytotoxic		5.56683e-10	-	5.42051e-10	3.40484e-11	0.973715					0.04386	7.17023e-05	0.0016348		3.25331e-06
	c	5.15438e-07	3.07019e-08	1.02445e-09	0.00198754	7.27845e-10	4.65068e-11	0.710471	8	1.42561e-09	7.22697e-11	0.958667	0.03509	0.00048883	0.0139308	1.95196e-06	1.33079e-05
33	a	4.82328e-07	2.26545e-08	3.96802e-10	0.00082268	3.23021e-10	2.05945e-11	0.814062					<1.00E-02	3.48401e-05	-		6.09182e-06
	b	4.85716e-07	4.23613e-08	2.87078e-10	0.000591041	2.19952e-10	1.32337e-11	0.766176					0.01785	8.99354e-05	0.0050384		2.5752e-06
	c	6.56348e-07	5.19315e-08	2.67857e-10	0.000408102	2.30376e-10	1.24114e-11	0.860071	8	2.83083e-10	1.75107e-11	0.228786	0.02909	6.17605e-05	0.00212308	6.37635e-06	2.52334e-06
34	a	Cytotoxic		1.63774e-10	-	1.37938e-10	6.50813e-12	0.842248					0.07727	5.18242e-05	0.00067069		1.53718e-06
35	a	Cytotoxic		2.24112e-10	-	1.72818e-10	1.09178e-11	0.771124					0.1743	0.000100678	0.000577615		3.77267e-06
36	a	Cytotoxic		7.84191e-10	-	4.86229e-10	3.03837e-11	0.620038					0.0713	0.000132366	0.00185646		1.18829e-05
	b	5.69954e-07	3.52061e-08	1.02767e-10	0.000180308	8.53522e-11	5.38147e-12	0.83054					0.0408	7.38367e-05	0.00180972		3.11574e-07
	c	Cytotoxic		1.45775e-09	-	1.28011e-09	8.59087e-11	0.878137	10	2.35538e-09	1.14695e-10	0.839987	0.04299	0.00025934	0.00603257	3.97835e-05	4.65321e-05
	d	3.4419e-07	2.46879e-08	1.90773e-10	0.000554266	1.46302e-10	9.17124e-12	0.76689					0.03641	0.000233363	0.0064093		1.80083e-06
37	a	5.3823e-07	2.84242e-08	2.15846e-10	0.000401029	1.90781e-10	1.29093e-11	0.883876	6	1.5882e-10	8.93227e-12	-0.20124	<1.00E-02	0.000114105	-	#VALUE!	3.13126e-06
	b	1.0087e-06	9.42543e-08	8.76154e-10	0.000868597	5.97475e-10	3.81605e-11	0.681929					0.047	0.000333763	0.00710134		3.06609e-06
	c	4.6893e-07	2.64282e-08	8.13942e-10	0.00173574	6.6276e-10	4.56467e-11	0.814259					N/A	0.000327051	-		9.1115e-06
	d	3.93624e-07	2.3991e-08	7.44981e-10	0.00189262	5.44092e-10	3.76868e-11	0.730343	5	6.90077e-10	3.58375e-11	0.26831	0.01636	0.000259612	0.0158687	#VALUE!	7.64534e-06
38	a	Cytotoxic		1.18669e-11	-	1.15621e-11	7.18978e-13	0.97431					0.0441	1.63551e-05	0.000370864		0
	b	Cytotoxic		1.49942e-10	-	1.01173e-10	9.22119e-12	0.674746					0.03185	2.15446e-05	0.000676438		4.07333e-06
	c	3.36644e-07	3.52413e-08	1.80679e-10	0.000536705	1.25834e-10	1.04569e-11	0.696452					0.03682	2.00519e-05	0.000544593		4.0344e-06
	d	1.24247e-06	5.814e-08	1.51053e-09	0.00121575	1.32083e-09	8.49034e-11	0.874413	12	2.13903e-09	1.20501e-10	0.619461	N/A	0.000215277	-	0.000100375	4.95592e-05
	e	Cytotoxic		1.69584e-10	-	1.60351e-10	1.42024e-11	0.945554					0.1866	2.60209e-05	0.000139447		6.78362e-06
39	a	2.70424e-07	2.64021e-08	1.83236e-11	6.77588e-05	1.82557e-11	1.15157e-12	0.996295					<1.00E-02	1.84934e-06	-		6.35764e-08
40	a	3.84692e-07	2.10958e-08	1.11191e-10	0.000289039	1.09647e-10	6.96161e-12	0.986111					0.03583	1.15716e-05	0.00032296		2.45996e-06
	b	1.08154e-06	5.5606e-08	2.08547e-09	0.00192824	2.03137e-09	1.31889e-10	0.97406					0.04131	0.00027496	0.00665602		3.87338e-05
41	a	3.22322e-07	1.62825e-08	5.02919e-10	0.0015603	4.89077e-10	3.11885e-11	0.972477	8	4.90552e-10	2.32996e-11	0.00301552	<1.00E-02	3.93095e-05	-	7.25812e-06	1.60334e-05
	b	6.30168e-07	2.614e-08	1.82542e-10	0.000289671	1.54361e-10	1.18299e-11	0.84562	6	2.32736e-10	1.38813e-11	0.507737	<1.00E-02	7.59917e-05	-	3.51307e-06	2.59235e-07
42	a	Cytotoxic		4.95695e-10	-	4.46396e-10	3.4195e-11	0.900544					0.07544	5.25133e-05	0.000696094		1.04168e-05
	b	3.68522e-07	4.99261e-08	4.73549e-10	0.001285	4.56381e-10	2.95683e-11	0.963745	8	5.95043e-10	2.98915e-11	0.303828	0.03595	4.57314e-05	0.00127208	4.97201e-06	1.11907e-05
43	a	1.03411e-06	6.84466e-08	4.46944e-10	0.000432201	4.32035e-10	3.03621e-11	0.966644	5	8.4504e-10	4.57536e-11	0.955952	0.0342	4.39895e-05	0.00128624	3.90967e-05	2.10602e-05
	b	7.00084e-07	9.56478e-08	2.69298e-10	0.000384665	2.37257e-10	1.56292e-11	0.881019	7	4.72973e-10	2.62865e-11	0.993504	0.02983	2.7948e-05	0.000936909	1.80457e-05	9.77835e-06
44	a	1.67398e-06	1.05297e-07	2.00137e-09	0.00119558	1.78307e-09	1.1654e-10	0.890925					0.03431	0.000282968	0.00824738		4.41525e-05
	b	2.98914e-06	3.79884e-07	1.9494e-09	0.00065216	1.81406e-09	7.41428e-11	0.930572	12	3.49249e-09	2.08076e-10	0.925241	0.2233	0.000440668	0.00197343	5.41718e-05	4.55051e-05
	c	3.0954e-06	1.84631e-07	9.79935e-09	0.00316578	9.58872e-09	5.19942e-10	0.978506	9	6.20183e-09	4.53316e-10	-0.546112	0.07716	0.00296819	0.038468	0.000148118	0.000537146
	d	1.51659e-06	1.10353e-07	1.52729e-08	0.0100705	1.51848e-08	7.14911e-11	0.99423	11	1.96835e-08	1.47146e-09	0.296269	0.06744	0.000729925	0.0108233	0.000671988	0.000304632
	e	2.31308e-06	1.13675e-07	2.40978e-09	0.0010418	2.40978e-09	1.52225e-10	1					0.03369	3.36572e-05	0.000999025		8.98756e-06
